# Supplementary material for: Untargeted metabolomics for uncovering plasma biological markers of wet age-related macular degeneration
Source: Aging (Albany NY). 2021 May 4;13(10):13968–4000. doi: 10.18632/aging.203006 (PMC8202859; doi:10.18632/aging.203006)
Supplement: Supplementary File 2 [file aging-13-203006-s002.xlsx]

## Sheet: CNV and control 
Supplementary File 2. The OPLS results of PCV and CNV cases and controls.
The OPLS results of CNV and control
Index	Compounds	Class	VIP	P value	Fold_Change	Log2FC	Type
MEDN005	L-Threonine	Amino Acid metabolomics	1.16209	0.000110325	1.30446	0.383453	insig
MEDN007	L-Arginine	Amino Acid metabolomics	0.295709	0.354829	0.918513	-0.122627	insig
MEDN010	L-Citrulline	Amino Acid metabolomics	0.519581	0.0170284	1.13884	0.187568	insig
MEDN011	L-Glutamic Acid	Amino Acid metabolomics	0.367441	0.113172	1.23231	0.301362	insig
MEDN013	L-Isoleucine	Amino Acid metabolomics	0.0654272	0.802193	0.984231	-0.0229307	insig
MEDN017	L-Pyroglutamic Acid	Amino Acid metabolomics	0.460622	0.186829	1.1337	0.181043	insig
MEDN018	L-Serine	Amino Acid metabolomics	1.5439	1.14242e-06	1.31179	0.391538	insig
MEDN030	5-Hydroxy-L-Tryptophan	Amino Acid metabolomics	0.896738	0.00793753	1.47371	0.559454	insig
MEDN033	Asp-Phe	Amino Acid metabolomics	0.698901	0.0623683	5.94877	2.57259	insig
MEDN041	Hexanoyl Glycine	Amino Acid metabolomics	1.17014	0.000358652	1.95191	0.964886	insig
MEDN042	L-Asparagine Anhydrous	Amino Acid metabolomics	0.418711	0.262701	1.05348	0.0751585	insig
MEDN043	L-Carnosine	Amino Acid metabolomics	0.606684	0.817304	0.978288	-0.0316693	insig
MEDN045	L-Cysteine	Amino Acid metabolomics	1.12019	2.29099e-05	1.19731	0.259797	insig
MEDN046	L-Glutamine	Amino Acid metabolomics	0.898107	0.000780578	1.10345	0.142016	insig
MEDN047	L-Homocitrulline	Amino Acid metabolomics	0.435447	0.343423	1.12	0.163501	insig
MEDN051	Methionine Sulfoxide	Amino Acid metabolomics	0.244136	0.00239039	1.28362	0.360223	insig
MEDN055	N-Acetyl-L-Glutamic Acid	Amino Acid metabolomics	0.511501	0.00302517	2.09844	1.06931	insig
MEDN056	N-Acetyl-L-Leucine	Amino Acid metabolomics	0.848193	0.107566	1.69027	0.757254	insig
MEDN060	N-Isovaleroylglycine	Amino Acid metabolomics	0.657934	0.0759613	1.38409	0.468938	insig
MEDN061	N-Phenylacetylglycine	Amino Acid metabolomics	0.444911	0.322031	1.44431	0.530384	insig
MEDN065	O-Phospho-L-Serine	Amino Acid metabolomics	0.258084	0.0781564	1.39103	0.476153	insig
MEDN072	Trans-4-Hydroxy-L-Proline	Amino Acid metabolomics	0.743702	0.0153038	1.12547	0.170532	insig
MEDN084	Benzoic Acid	Benzene and substituted derivatives	0.366859	0.144269	0.930812	-0.103438	insig
MEDN086	Terephthalic Acid	Benzene and substituted derivatives	0.719434	0.00662421	1.0523	0.0735497	insig
MEDN087	(3,4-Dimethoxyphenyl) Acetic Acid	Benzene and substituted derivatives	1.51936	6.90965e-07	1.38347	0.468289	insig
MEDN090	2-Methoxybenzoic Acid	Benzoic Acid And Its Derivatives	1.53427	0.00222207	2.77885	1.47449	up
MEDN092	3,4-Dihydroxybenzeneacetic Acid	Benzene and substituted derivatives	0.0154268	0.249212	1.04795	0.0675676	insig
MEDN093	3-Hydroxyanthranilic Acid	Benzoic Acid And Its Derivatives	0.96141	0.00265077	1.53161	0.615048	insig
MEDN097	P–Hydroxyphenyl Acetic Acid	Benzene and substituted derivatives	0.79756	0.0061411	1.49705	0.582121	insig
MEDN105	Taurocholic Acid	Bile Acids	0.008474	0.895258	1.03454	0.0489906	insig
MEDN109	Hyodeoxycholic Acid	Bile Acids	0.628153	0.440189	1.27459	0.350038	insig
MEDN110	Glycoursodeoxycholic Acid	Bile Acids	0.250919	0.320878	1.24063	0.311072	insig
MEDN112	Glycocholic Acid	Bile Acids	0.353183	0.829282	0.954677	-0.0669152	insig
MEDN113	Glycochenodeoxycholic Acid	Bile Acids	0.0537141	0.643023	0.942726	-0.0850895	insig
MEDN115	Chenodeoxycholic Acid	Bile Acids	0.284755	0.0222646	2.025	1.01793	insig
MEDN124	Protocatechuic Acid	Phenols And Its Derivatives	0.458493	0.00343344	1.72433	0.786038	insig
MEDN139	1-Methylxanthine	Nucleotide metabolomics	0.871631	0.00347327	3.2308	1.69189	insig
MEDN140	2,6-Dihydroxypurine	Nucleotide metabolomics	0.97119	0.00818789	1.88423	0.913973	insig
MEDN147	5-Methylcytosine	Nucleotide metabolomics	0.462742	0.832693	0.98764	-0.0179432	insig
MEDN163	Hypoxanthine	Nucleotide metabolomics	0.9463	0.0402293	4.79722	2.2622	insig
MEDN168	Thymidine	Nucleotide metabolomics	0.233136	0.225807	1.17162	0.228501	insig
MEDN171	Uridine	Nucleotide metabolomics	0.644186	0.00868965	1.21317	0.278776	insig
MEDN172	Β-Nicotinamide Mononucleotide	Nucleotide metabolomics	0.437403	0.00231806	1.23113	0.299986	insig
MEDN178	Epinephrine	Hormones	0.847386	0.0016039	1.06119	0.0856849	insig
MEDN196	Pyrroloquinoline Quinone	Organic Acid And Its Derivatives	0.256176	0.0222883	1.67655	0.7455	insig
MEDN198	Citric Acid	Amino Acid metabolomics	0.398963	3.2174e-07	1.7385	0.797842	insig
MEDN201	Succinic Acid	Amino Acid metabolomics	1.27311	2.6131e-05	1.43966	0.525724	insig
MEDN202	A-Ketoglutaric Acid	Amino Acid metabolomics	1.07127	0.176284	2.58529	1.37033	insig
MEDN209	Tryptamine	Tryptamines And Its Derivatives	0.712874	0.0154839	1.55498	0.636893	insig
MEDN213	D-Sorbitol	Carbohydrate metabolomics	0.152949	0.206122	1.15585	0.208952	insig
MEDN220	D-Glucose	Carbohydrate metabolomics	0.859568	0.00228485	1.2352	0.304744	insig
MEDN224	D-Trehalose	Carbohydrate metabolomics	0.623647	0.0401807	0.887661	-0.171919	insig
MEDN226	D-Erythronolactone	Carbohydrate metabolomics	1.17943	2.59563e-05	1.07145	0.0995672	insig
MEDN228	D-Arabinose	Carbohydrate metabolomics	1.30492	2.12633e-06	1.75663	0.812807	insig
MEDN231	L-Fucose	Carbohydrate metabolomics	0.80879	0.00563051	1.65141	0.723696	insig
MEDN232	L-Rhamnose	Carbohydrate metabolomics	0.150965	0.0296531	1.54486	0.627475	insig
MEDN240	L-Gulonic-Γ-Lactone	Carbohydrate metabolomics	0.161945	0.0639584	1.12016	0.1637	insig
MEDN241	Vitamin D3	CoOthersEnzyme Factor & vitamin	1.72973	5.55787e-26	2.94892	1.56018	up
MEDN244	Orotic Acid	CoOthersEnzyme Factor & vitamin	0.471846	0.000137648	1.56504	0.646201	insig
MEDN245	Pantothenate	CoOthersEnzyme Factor & vitamin	1.17179	0.0147583	1.31712	0.397389	insig
MEDN273	1,3-Dimethyluric Acid	Organic Acid And Its Derivatives	0.787138	0.00152659	3.38049	1.75723	insig
MEDN274	1,7-Dimethyluric Acid	Organic Acid And Its Derivatives	0.795603	0.00167667	3.34378	1.74148	insig
MEDN279	2-Aminoethanesulfinic Acid	Organic Acid And Its Derivatives	0.349982	0.893944	1.01888	0.0269892	insig
MEDN280	2-Aminoethanesulfonic Acid	Organic Acid And Its Derivatives	0.352373	0.904651	1.01596	0.0228446	insig
MEDN283	2-Hydroxybutanoic Acid	Organic Acid And Its Derivatives	0.98418	0.00737853	1.22725	0.295425	insig
MEDN284	2-Hydroxyisocaproic Acid	Organic Acid And Its Derivatives	0.301176	0.172245	1.17875	0.23726	insig
MEDN285	2-Methylsuccinic Acid	Organic Acid And Its Derivatives	0.251582	0.106107	1.18535	0.245319	insig
MEDN286	3,4,5-Trimethoxycinnamic Acid	Organic Acid And Its Derivatives	0.401462	0.198102	2.18138	1.12524	insig
MEDN290	3-Hydroxy-3-Methyl Butyric Acid	Organic Acid And Its Derivatives	0.959746	0.0031809	1.20195	0.265376	insig
MEDN292	3-Hydroxybutyrate	Organic Acid And Its Derivatives	0.978371	0.00334345	1.8436	0.882526	insig
MEDN299	Adipic Acid	Organic Acid And Its Derivatives	1.29545	0.14182	2.52018	1.33353	insig
MEDN300	Azelaic Acid	Organic Acid And Its Derivatives	1.60075	1.31477e-07	1.3531	0.436266	insig
MEDN301	Caffeic Acid	Organic Acid And Its Derivatives	0.992516	0.226191	1.31389	0.393841	insig
MEDN305	Creatine	Organic Acid And Its Derivatives	0.184625	0.323243	0.915968	-0.126631	insig
MEDN311	Dodecanedioic Aicd	Organic Acid And Its Derivatives	0.846785	0.0235626	1.42805	0.514046	insig
MEDN314	Glutaric Acid	Organic Acid And Its Derivatives	0.45733	0.0307391	1.25715	0.330161	insig
MEDN316	Guanidinoethyl Sulfonate	Organic Acid And Its Derivatives	0.631703	0.0450719	0.955525	-0.0656343	insig
MEDN321	Kinic Acid	Organic Acid And Its Derivatives	0.221117	6.54604e-07	1.69848	0.764242	insig
MEDN322	Kinurenine	Organic Acid And Its Derivatives	1.05424	9.26e-05	1.21106	0.276269	insig
MEDN323	Kynurenic Acid	Organic Acid And Its Derivatives	1.06828	0.000549422	1.41496	0.500765	insig
MEDN324	L-3-Phenyllactic Acid	Organic Acid And Its Derivatives	0.702636	0.00993554	1.27883	0.354819	insig
MEDN325	L-Lactic Acid	Organic Acid And Its Derivatives	1.80325	5.98864e-11	1.69122	0.758068	insig
MEDN333	Malonicacid	Organic Acid And Its Derivatives	0.989224	0.00319151	1.84759	0.885641	insig
MEDN334	Mandelic Acid	Organic Acid And Its Derivatives	0.814159	0.00571113	1.50287	0.587719	insig
MEDN335	Methylmalonic Acid	Organic Acid And Its Derivatives	1.34626	1.94359e-05	1.44061	0.526678	insig
MEDN338	Phenyllactate (Pla)	Organic Acid And Its Derivatives	0.890463	0.00166114	1.33513	0.416978	insig
MEDN339	Phenylpyruvic Acid	Organic Acid And Its Derivatives	1.07153	0.0028319	1.35074	0.433746	insig
MEDN340	Pyrrole-2-Carboxylic Acid	Organic Acid And Its Derivatives	0.610671	0.0285452	1.22752	0.295742	insig
MEDN343	Shikimic Acid	Organic Acid And Its Derivatives	0.309999	0.0676341	1.35892	0.442464	insig
MEDN344	Subericacid	Organic Acid And Its Derivatives	1.78423	4.55601e-09	1.36597	0.449925	insig
MEDN346	Vanillic Acid	Organic Acid And Its Derivatives	0.559566	0.0133452	1.68587	0.753494	insig
MEDN351	12-Hete	Lipids	0.521526	0.0945052	7.34988	2.87772	insig
MEDN352	O-Phosphorylethanolamine	LipidsOthersPhospholipid	1.34832	1.95509e-07	0.476937	-1.06813	down
MEDN356	Lysops 22:6	LipidsOthersPhospholipid	1.99106	8.79919e-13	1.5492	0.631526	insig
MEDN360	Lysopg 18:1	LipidsOthersPhospholipid	1.81739	1.45196e-10	1.32844	0.409732	insig
MEDN362	Lysope 18:1	LipidsOthersPhospholipid	0.992879	0.000246241	1.36695	0.45096	insig
MEDN364	Lysope 18:0	LipidsOthersPhospholipid	1.6488	7.73774e-09	1.34953	0.432453	insig
MEDN366	Lysope 16:0	LipidsOthersPhospholipid	1.37384	5.48695e-07	1.27716	0.352942	insig
MEDN368	Lysope 14:0	LipidsOthersPhospholipid	0.683687	0.0610641	1.28834	0.365518	insig
MEDN370	Lysopa 18:0	LipidsOthersPhospholipid	1.9605	1.85754e-12	1.44272	0.528789	insig
MEDN372	Lysopa 16:0	LipidsOthersPhospholipid	2.21585	2.35013e-16	1.45789	0.54388	insig
MEDN374	9-Hpode	Lipids	0.262878	0.120606	0.781708	-0.355299	insig
MEDN375	13-HOTrE [13S-hydroxy-9Z,11E,15Z-octadecatrienoic acid]	Oxidized lipid	0.560962	0.0131115	1.19112	0.252321	insig
MEDN376	9,10-DiHOME [(±)9,10-dihydroxy-12Z-octadecenoic acid]	Oxidized lipid	0.188645	0.423699	1.07664	0.106533	insig
MEDN378	γ-Linolenic Acid(C18:3N6)	Lipids_Fatty Acids	1.26699	0.000580883	1.5563	0.638122	insig
MEDN380	Palmitoleic Acid (C16:1)	Lipids_Fatty Acids	0.417111	0.533187	1.09092	0.125548	insig
MEDN381	Hexadecanoic Acid (C16:0)	Lipids_Fatty Acids	0.554915	0.102701	1.06784	0.0946952	insig
MEDN383	Linoleic Acid (C18:2N6C)	Lipids_Fatty Acids	0.308693	0.100201	0.895686	-0.158936	insig
MEDN385	Dodecanoic Acid(C12:0)	Lipids_Fatty Acids	0.69074	0.0679795	1.47757	0.563223	insig
MEDN388	Elaidic Acid (C18:1N9T)	Lipids_Fatty Acids	0.967974	0.00533619	1.19486	0.256836	insig
MEDN390	EPA [5Z,8Z,11Z,14Z,17Z-eicosapentaenoic acid]	Oxidized lipid	1.18112	4.22318e-05	1.86321	0.897794	insig
MEDN391	DHA [4Z,7Z,10Z,13Z,16Z,19Z-docosahexaenoic acid]	Oxidized lipid	0.689174	0.0693923	1.2529	0.325272	insig
MEDN394	Cis-11,14-Eicosadienoic Acid (C20:2)	Lipids_Fatty Acids	0.749344	0.105782	1.19993	0.262953	insig
MEDN395	Cis-11,14,17-Eicosatrienoic Acid (C20:3)	Lipids_Fatty Acids	2.09024	2.27403e-15	1.19038	0.251425	insig
MEDN399	Arachidic Acid(C20:0)	Lipids_Fatty Acids	0.779859	0.0152842	1.2944	0.372279	insig
MEDN400	Α-Linolenic Acid(C18:3N3)	Lipids_Fatty Acids	1.16749	0.00321447	1.4722	0.557974	insig
MEDN403	Urocanic Acid	Organic Acid And Its Derivatives	0.575876	0.892207	1.10029	0.13788	insig
MEDN406	3-(3-Hydroxyphenyl)Propionate Acid	Organic Acid And Its Derivatives	0.0716369	0.869691	0.944528	-0.0823342	insig
MEDN414	4-(Aminomethyl)-5-(Hydroxymethyl)-2-Methylpyridin-3-Ol	Others	0.178858	0.829604	0.984918	-0.0219242	insig
MEDN429	3-Hydroxyhippuric Acid	Organic Acid And Its Derivatives	0.171284	0.0339207	1.65882	0.730155	insig
MEDN430	Thiamine Triphosphate	CoOthersEnzyme Factor & vitamin	1.28124	6.38458e-07	1.11955	0.162913	insig
MEDN432	5-Hydroxyhexanoic Acid	Organic Acid And Its Derivatives	1.10797	0.00105378	1.84277	0.881877	insig
MEDN434	Β-Pseudouridine	Nucleotide metabolomics	0.616852	0.0148366	1.11154	0.152566	insig
MEDN444	Hypoxanthine-9-β-D-Arabinofuranoside	Nucleotide metabolomics	0.534949	0.106826	68.8377	6.10513	insig
MEDN470	Oxoadipic Acid	Organic Acid And Its Derivatives	1.24307	0.00212805	1.58543	0.664877	insig
MEDN472	1-Methyluric Acid	Organic Acid And Its Derivatives	1.01142	0.000889114	2.5362	1.34267	up
MEDN478	Aminomalonic Acid	Organic Acid And Its Derivatives	1.11511	0.00014474	1.40545	0.491028	insig
MEDN481	2,4-Dihydroxybenzoic Acid	Benzene and substituted derivatives	0.888793	0.000463665	2.31061	1.20827	insig
MEDN483	3-Methyl-2-Oxobutanoic Acid	Organic Acid And Its Derivatives	1.38241	4.65623e-07	1.2762	0.351858	insig
MEDN486	Palmitaldehyde	Lipids_Fatty Acids	0.323225	0.222539	0.930378	-0.104111	insig
MEDN487	Allysine	Organic Acid And Its Derivatives	0.146753	0.034781	1.1663	0.221941	insig
MEDN490	Fumaric Acid	Amino Acid metabolomics	0.469234	0.0531262	1.0754	0.104873	insig
MEDN491	9-HOTrE [9S-hydroxy-10E,12Z,15Z-octadecatrienoic acid]	Oxidized lipid	0.117651	0.388199	1.05043	0.0709771	insig
MEDN494	8,15-Dihete	Lipids_Fatty Acids	0.247886	0.864685	0.973508	-0.0387349	insig
MEDN496	N-Acetylmethionine	Amino Acid metabolomics	1.20025	0.00029418	1.46661	0.552483	insig
MEDN498	Ribulose-5-Phosphate	Carbohydrate metabolomics	0.0370581	2.19886e-05	1.23866	0.308782	insig
MEDN499	Argininosuccinic acid	Organic Acid And Its Derivatives	0.858605	1.23002e-06	1.23249	0.301577	insig
MEDN502	2-Deoxyribose 1-Phosphate	Carbohydrate metabolomics	0.0206659	0.657367	1.01876	0.0268173	insig
MEDN506	N-Acetylglucosamine 1-Phosphate	Carbohydrate metabolomics	0.487538	0.00316645	1.23562	0.30523	insig
MEDN523	Indolelactic acid	Indole And Its Derivatives	0.991904	1.24638e-08	1.67669	0.74562	insig
MEDN524	Estrone	Hormones	1.2785	8.79537e-06	1.67718	0.746038	insig
MEDN528	(3-Methoxy-4-hydroxyphenyl)ethylene glycol sulfate	Organic Acid And Its Derivatives	1.08934	0.000104935	1.39048	0.475585	insig
MEDN530	Pimelic acid	Organic Acid And Its Derivatives	1.53021	6.74343e-06	1.6461	0.719056	insig
MEDN533	Xanthosine	Nucleotide metabolomics	0.969986	0.00487579	1.50489	0.58966	insig
MEDN538	UDP-glucose	Nucleotide metabolomics	1.39087	3.67588e-08	0.337288	-1.56795	down
MEDN540	1-Methylguanine	Nucleotide metabolomics	0.874582	3.89658e-05	1.31408	0.394057	insig
MEDN551	Indoleacrylic acid	Organic Acid And Its Derivatives	0.306897	0.0894613	0.714015	-0.485974	insig
MEDN553	2-Methylbenzoic acid	Benzene and substituted derivatives	1.00114	0.0416024	4.973	2.31412	up
MEDN555	Hydroxyphenyllactic acid	Carbohydrate metabolomics	0.964497	0.000258903	1.29466	0.37257	insig
MEDN560	MARMESIN	Carbohydrate metabolomics	0.871514	0.0057834	1.74422	0.802585	insig
MEDN562	INDOLE-3-CARBINOL	Indole And Its Derivatives	0.579716	0.0599393	1.22571	0.293621	insig
MEDN563	DL-Benzylsuccinic acid	Lipids_Fatty Acids	0.615727	0.0115907	1.48239	0.567929	insig
MEDN568	2-Methylguanosine	Nucleotide metabolomics	0.569919	0.0044971	1.16721	0.223063	insig
MEDN569	DL-o-Tyrosine	Organic Acid And Its Derivatives	0.0670856	0.58974	0.968497	-0.0461809	insig
MEDN570	L-Erythrulose	Carbohydrate metabolomics	1.09999	0.0010176	1.29671	0.374853	insig
MEDN575	3-Hydroxypicolinic acid	Pyridine And Pyridine Derivatives	0.650022	0.979914	1.01867	0.0266907	insig
MEDN576	1,2,3-Trihydroxybenzene	Benzene and substituted derivatives	0.901202	0.111611	2.06913	1.04903	insig
MEDN579	N-lactoyl-phenylalanine	Organic Acid And Its Derivatives	0.560745	0.0226472	1.2486	0.320317	insig
MEDN587	N-Acetylvaline	Organic Acid And Its Derivatives	0.366392	0.159696	1.23361	0.302882	insig
MEDN589	Cyclamic acid	Organic Acid And Its Derivatives	0.371466	0.0734025	3.4222	1.77492	insig
MEDN593	D-(+)-Malic acid	Amino Acid metabolomics	0.25256	5.65778e-07	1.85137	0.888592	insig
MEDN602	deoxyguanosine 5'-monophosphate (dGMP)	Nucleotide metabolomics	0.770863	0.360645	1.27583	0.351435	insig
MEDN604	Tetradecanedioic acid	Lipids_Fatty Acids	1.02985	0.000539907	1.37205	0.456329	insig
MEDN606	5-Methoxytryptophol	Indole And Its Derivatives	1.14559	1.54799e-05	1.27354	0.348843	insig
MEDN609	Uridine triphosphate (UTP)	Nucleotide metabolomics	0.992741	0.0198011	1.79378	0.843004	insig
MEDN611	6β-hydroxytestosterone	Hormones	0.258432	0.614383	0.976109	-0.0348851	insig
MEDN615	Carbamoyl phosphate	Organic Acid And Its Derivatives	1.05988	2.48016e-06	0.456446	-1.13148	down
MEDN620	Glucotropaeolin	Carbohydrate metabolomics	0.886246	0.000244933	0.890711	-0.166971	insig
MEDN621	Indoxylsulfuric acid	Organic Acid And Its Derivatives	0.648529	0.000706407	1.62131	0.697158	insig
MEDN622	Porphobilinogen	Organic Acid And Its Derivatives	0.39458	0.296497	0.935243	-0.0965866	insig
MEDN623	Salicyluric acid	Benzene and substituted derivatives	0.415454	0.441134	1.16918	0.225492	insig
MEDN625	Formononetin	Carbohydrate metabolomics	0.733695	0.0366522	1.23162	0.300561	insig
MEDN632	N-Oleoyl Glycine	Organic Acid And Its Derivatives	2.73951	6.60827e-36	1.40345	0.48898	insig
MEDN647	Hydroquinone	Phenols And Its Derivatives	0.899841	0.00249103	1.79887	0.847088	insig
MEDN649	Anthranilic acid	Benzene and substituted derivatives	0.822734	1.8285e-06	1.39379	0.479013	insig
MEDN651	Succinic anhydride	Organic Acid And Its Derivatives	0.144954	0.862139	0.992051	-0.0115139	insig
MEDN654	3-Methylsalicylic acid	Organic Acid And Its Derivatives	1.06253	0.000149227	0.895485	-0.159258	insig
MEDN656	Indoleacetaldehyde	Indole And Its Derivatives	0.7312	0.0158173	1.5843	0.663842	insig
MEDN657	D-Xylulose 5-phosphate	Carbohydrate metabolomics	0.852727	1.75358e-08	0.690835	-0.533587	insig
MEDN658	Hexadecanedioic acid	Lipids_Fatty Acids	0.630514	0.0144586	1.40469	0.490254	insig
MEDN659	Pyrophosphate	Organic Acid And Its Derivatives	0.249921	0.205572	1.14928	0.20073	insig
MEDN661	Vanillylmandelic acid	Benzene and substituted derivatives	1.5291	1.22175e-06	1.45225	0.538294	insig
MEDN662	Gamma-Glu-Leu	Organic Acid And Its Derivatives	1.26548	5.04021e-05	1.27035	0.345231	insig
MEDN675	Methylstearate	Fatty acyls	1.07871	0.000426888	0.855074	-0.225879	insig
MEDN678	Ethylsalicylate	Organic Acid And Its Derivatives	0.550602	0.15097	1.09007	0.12442	insig
MEDN679	Maltol	Heterocyclic compound	0.0660379	0.0288161	1.44446	0.530533	insig
MEDN682	Octadecanamide	Fatty acyls	0.0420525	0.579397	1.01594	0.0228162	insig
MEDN694	2-nonanol	Alcohol	0.195217	0.409923	1.02012	0.0287389	insig
MEDN698	1-Naphthol	Phenols And Its Derivatives	0.0188427	0.889504	1.00337	0.00485059	insig
MEDN704	Oxaloacetic acid	Organic Acid And Its Derivatives	0.400118	0.0410528	1.14778	0.198849	insig
MEDN706	Butyl??Acetate	Fatty acyls	0.544428	0.0379986	1.22009	0.286987	insig
MEDN719	2-n-Pentylfuran	Heterocyclic compound	0.285106	0.505387	0.969889	-0.0441091	insig
MEDN725	Sorbic acid	Organic Acid And Its Derivatives	0.681567	0.00660504	1.109	0.149258	insig
MEDN727	Methyl hexadecanoate	Fatty acyls	2.83407	3.52111e-40	1.50184	0.586734	insig
MEDN729	Phenoxyacetic acid	Benzene and substituted derivatives	0.246089	0.546962	1.34066	0.422944	insig
MEDN731	4-tert-Octylphenol	Phenols And Its Derivatives	0.966795	0.00188321	0.954273	-0.0675254	insig
MEDN732	RICINOLEIC ACID	Fatty acyls	0.0253372	0.489012	1.08021	0.111318	insig
MEDN733	PHENYL-BETA-D-GLUCOPYRANOSIDE	Carbohydrate metabolomics	0.0641563	0.990408	0.999521	-0.000690663	insig
MEDN734	Cis-3-Hexenylacetate	Fatty acyls	0.047677	0.764463	1.00632	0.00909092	insig
MEDN736	2-(Methylthio)ethanol	Alcohol	0.17597	0.953541	0.995757	-0.00613501	insig
MEDN741	Methanesulfonic acid	Others	0.147439	0.000364131	4.83968	2.27491	insig
MEDN743	2-Nonanone	Ketones	0.226405	0.334259	1.02049	0.029266	insig
MEDN745	Propylparaben	Benzoic Acid And Its Derivatives	0.297165	0.612131	1.09643	0.13281	insig
MEDN747	2,4-Di-tert-butylphenol	Phenols And Its Derivatives	1.89429	2.36797e-10	0.892491	-0.16409	insig
MEDN748	Methylparaben	Benzoic Acid And Its Derivatives	1.20327	0.0157742	0.843011	-0.246376	insig
MEDN750	(±)12-HEPE [(±)-12-hydroxy-5Z,8Z,10E,14Z,17Z-eicosapentaenoic acid]	Oxidized lipid	0.77832	0.0733225	4.3933	2.1353	insig
MEDN751	(±)12-HETE [(±)12-hydroxy-5Z,8Z,10E,14Z-eicosatetraenoic acid]	Oxidized lipid	0.937276	0.0933195	10.7786	3.4301	insig
MEDN758	(±)4-HDHA [(±)4-hydroxy-5E,7Z,10Z,13Z,16Z,19Z-docosahexaenoic acid]	Oxidized lipid	1.23475	0.0454194	3.50467	1.80928	up
MEDN760	(±)5-HETE [(±)5-hydroxy-6E,8Z,11Z,14Z-eicosatetraenoic acid]	Oxidized lipid	1.54637	0.780099	0.925346	-0.111935	insig
MEDN763	(±)9-HETE [(±)-9-hydroxy-5Z,7E,11Z,14Z-eicosatetraenoic acid]	Oxidized lipid	1.04275	0.0544334	1.99407	0.995716	insig
MEDN765	11,12-EET [(±)11,(12)-epoxy-5Z,8Z,14Z-eicosatrienoic acid]	Oxidized lipid	1.23051	0.0960596	1.52724	0.610929	insig
MEDN767	12,13-EpOME [(±)12(13)epoxy-9Z-octadecenoic acid]	Oxidized lipid	0.627677	0.023832	1.38464	0.469507	insig
MEDN768	13-oxoODE [13-oxo-9Z,11E-octadecadienoic acid]	Oxidized lipid	0.427124	0.0200029	1.12618	0.171433	insig
MEDN769	14(S)-HDHA [14S-hydroxy-4Z,7Z,10Z,12E,16Z,19Z-docosahexaenoic acid]	Oxidized lipid	1.12268	0.0840017	6.20057	2.6324	insig
MEDN771	15-oxoETE [15-oxo-5Z,8Z,11Z,13E-eicosatetraenoic acid]	Oxidized lipid	1.51853	7.42466e-06	3.26638	1.70769	up
MEDN776	5(S),15(S)-DiHETE [5S,15S-dihydroxy-6E,8Z,10Z,13E-eicosatetraenoic acid]	Oxidized lipid	1.23267	0.0333928	1.72299	0.784915	insig
MEDN783	9,10-EpOME [(±)9,10-epoxy-12Z-octadecenoic acid]	Oxidized lipid	1.44203	3.99754e-06	1.29401	0.371844	insig
MEDN784	9-oxoODE [9-oxo-10E,12Z-octadecadienoic acid]	Oxidized lipid	0.263831	0.225055	1.0176	0.0251715	insig
MEDN785	LTB4 [5S,12R-dihydroxy-6Z,8E,10E,14Z-eicosatetraenoic acid]	Oxidized lipid	0.25624	0.127613	1.42056	0.506456	insig
MEDN795	PGF2α [9α,11α,15S-trihydroxy-prosta-5Z,13E-dien-1-oic acid]	Oxidized lipid	1.07076	1.12033e-07	1.68376	0.751688	insig
MEDN798	PGK1 [9,11-dioxo-15S-hydroxy-prost-13E-en-1-oic acid]	Oxidized lipid	1.67262	1.49124e-10	1.19737	0.25987	insig
MEDN806	Nα-Acetyl-L-glutamine	Carboxylic acids and derivatives	0.0650529	0.00220719	1.48931	0.574642	insig
MEDN813	Xylose	Carbohydrate metabolomics	1.15498	2.58763e-05	1.59177	0.670631	insig
MEDN816	4-Hydroxyhippurate	Benzene and substituted derivatives	0.40884	0.412923	1.19105	0.25224	insig
MEDN818	N-acetyl-beta-alanine	Amino Acid metabolomics	1.34844	5.91819e-06	1.21992	0.286788	insig
MEDN821	Scyllo inositol	Alcohol	0.976962	0.000120972	1.5756	0.655898	insig
MEDN824	7-ketodeoxycholic acid	Lipids	0.825168	0.0652531	1.55368	0.635686	insig
MEDN826	3-(3-Hydroxyphenyl)-3-hydroxypropanoic acid	Organic Acid And Its Derivatives	0.288998	0.0104144	1.95226	0.965149	insig
MEDN827	N-acetylornithine	Organic Acid And Its Derivatives	0.401953	0.104137	0.862535	-0.213344	insig
MEDN828	Nonadecylic acid	Lipids_Fatty Acids	2.50525	2.21186e-17	1.68001	0.748473	insig
MEDN843	N-Amidino-L-Aspartate	Amino Acid metabolomics	0.52101	0.157262	0.888155	-0.171116	insig
MEDN846	Lumichrome	Others	0.709714	0.043015	0.904736	-0.144431	insig
MEDN854	Mono-Methyl Glutarate	Organic Acid And Its Derivatives	1.49888	1.22127e-08	0.86693	-0.206013	insig
MEDN860	3,3',5'-Triiodothyronine	Organic Acid And Its Derivatives	1.7715	3.20053e-09	1.2896	0.366925	insig
MEDN861	1-Hydroxy-2-Naphthoate	Organic Acid And Its Derivatives	1.58386	0.404602	0.179385	-2.47887	insig
MEDN862	Phenylpyruvate	Benzene and substituted derivatives	0.749141	0.000238759	1.33095	0.412456	insig
MEDP002	D-Homocysteine	Amino Acid metabolomics	1.09063	6.50292e-05	1.22714	0.295301	insig
MEDP006	Glycine	Amino Acid metabolomics	0.036941	0.617976	1.03224	0.0457789	insig
MEDP007	L-Cystine	Amino Acid metabolomics	1.02111	2.31509e-05	0.670099	-0.577554	insig
MEDP009	L-Tyrosine	Amino Acid metabolomics	0.848373	0.0161432	1.07427	0.103351	insig
MEDP011	L-Lysine	Amino Acid metabolomics	0.998246	0.000841776	1.1657	0.221191	insig
MEDP012	L-Ornithine	Amino Acid metabolomics	1.50117	4.55657e-06	1.47361	0.559351	insig
MEDP013	L-Alanine	Amino Acid metabolomics	0.439003	0.0279965	1.14316	0.193023	insig
MEDP014	L-Aspartic Acid	Amino Acid metabolomics	0.859632	0.0205324	1.37978	0.464439	insig
MEDP017	L-Histidine	Amino Acid metabolomics	1.15143	7.63703e-05	1.17926	0.237888	insig
MEDP019	L-Leucine	Amino Acid metabolomics	0.2118	0.530117	1.01317	0.0188817	insig
MEDP020	L-Methionine	Amino Acid metabolomics	0.33551	0.288461	1.05398	0.0758408	insig
MEDP021	L-Phenylalanine	Amino Acid metabolomics	1.52697	8.86453e-07	1.03014	0.0428444	insig
MEDP022	L-Proline	Amino Acid metabolomics	1.20183	1.73192e-05	1.24083	0.311301	insig
MEDP025	L-Tryptophan	Amino Acid metabolomics	0.836631	0.00523969	1.0591	0.0828449	insig
MEDP026	L-Valine	Amino Acid metabolomics	0.956998	0.00196165	1.08916	0.123216	insig
MEDP028	(5-L-Glutamyl)-L-Amino Acid	Amino Acid metabolomics	1.16447	2.57977e-05	1.31535	0.395446	insig
MEDP031	3-Chloro-L-Tyrosine	Amino Acid metabolomics	1.53284	2.0924e-08	0.828856	-0.270807	insig
MEDP032	3-Hydroxy-3-Methylpentane-1,5-Dioic Acid	Amino Acid metabolomics	0.622702	7.43311e-15	1.62985	0.704736	insig
MEDP034	3-N-Methyl-L-Histidine	Amino Acid metabolomics	0.686984	0.0948157	1.71283	0.776385	insig
MEDP036	5-Oxoproline	Amino Acid metabolomics	0.306388	0.481298	0.967965	-0.0469737	insig
MEDP039	Betaine	Alkaloid	0.173182	0.871771	0.994218	-0.00836585	insig
MEDP044	Glutathione Reducedform	Amino Acid metabolomics	0.00603755	0.209826	1.16887	0.225118	insig
MEDP058	L-Saccharopine	Amino Acid metabolomics	1.24026	2.83269e-06	0.764467	-0.387473	insig
MEDP059	L-Theanine	Amino Acid metabolomics	0.623649	0.099953	0.885862	-0.174846	insig
MEDP061	N,N-Dimethylglycine	Amino Acid metabolomics	1.02978	0.000343986	1.14563	0.19614	insig
MEDP062	N6-Acetyl-L-Lysine	Amino Acid metabolomics	0.934004	0.000983268	1.15985	0.213937	insig
MEDP066	N-Acetyl-L-Tyrosine	Amino Acid metabolomics	0.0887912	0.760216	1.02324	0.0331471	insig
MEDP067	N-Acetylmannosamine	Amino Acid metabolomics	0.711324	0.0200181	1.18273	0.242122	insig
MEDP068	N-Acetylneuraminic Acid	Amino Acid metabolomics	0.568076	0.0432301	0.62595	-0.67588	insig
MEDP069	N-Acetylputrescine	Organic Acid And Its Derivatives	1.7809	4.19784e-11	0.882218	-0.180794	insig
MEDP071	N-Glycyl-L-Leucine	Amino Acid metabolomics	0.567166	0.000163088	1.49101	0.576288	insig
MEDP075	Nα-Acetyl-L-Arginine	Amino Acid metabolomics	2.83764	1.27091e-29	1.92537	0.945133	insig
MEDP077	Phenylacetyl-L-Glutamine	Amino Acid metabolomics	0.765914	0.119209	1.29398	0.371812	insig
MEDP078	Phe-Phe	Amino Acid metabolomics	0.777403	0.0635714	15.8135	3.98309	insig
MEDP079	S-(5-Adenosy)-L-Homocysteine	Amino Acid metabolomics	0.799631	0.000879835	1.23999	0.310325	insig
MEDP082	S-Sulfo-L-Cysteine	Amino Acid metabolomics	0.115031	0.430871	0.933959	-0.0985695	insig
MEDP084	Trimethylamine N-Oxide	Amino Acid metabolomics	1.14743	0.000939876	2.62195	1.39064	up
MEDP086	Urea	Amino Acid metabolomics	1.31453	1.88178e-06	1.18557	0.245575	insig
MEDP087	L-Alanyl-L-Lysine	Amino Acid metabolomics	0.727184	0.00586201	1.38203	0.466788	insig
MEDP089	N-Acetylhistamine	Organic Acid And Its Derivatives	0.469774	0.0884694	1.19275	0.254288	insig
MEDP101	P-Coumaric Acid	Benzene and substituted derivatives	0.894973	0.0100929	1.11816	0.161122	insig
MEDP102	Syringic Acid	Benzene and substituted derivatives	0.06711	0.319867	1.17499	0.232654	insig
MEDP111	3-(4-Hydroxyphenyl)-Propionic Acid	Benzene and substituted derivatives	0.25515	0.490921	1.09123	0.125957	insig
MEDP112	4-Ethylbenzoic Acid	Benzene and substituted derivatives	1.48974	7.67316e-07	1.11095	0.151789	insig
MEDP114	Phthalic Acid	Benzene and substituted derivatives	2.55491	5.44751e-26	1.11566	0.157896	insig
MEDP115	1,4-Dihydro-1-Methyl-4-Oxo-3-Pyridinecarboxamide	Pyridine And Pyridine Derivatives	0.466177	0.0936282	1.18776	0.248237	insig
MEDP118	4-Pyridoxic Acid	Pyridine And Pyridine Derivatives	0.39398	0.198662	1.34722	0.429986	insig
MEDP120	Theobromine	Nucleotide metabolomics	0.827019	0.0833954	1.93362	0.951302	insig
MEDP123	Acetylcholine Chloride	Cholines	0.0144162	0.80294	0.985398	-0.0212218	insig
MEDP125	Choline	Cholines	1.16166	1.9655e-05	1.17855	0.237008	insig
MEDP127	Putrescine	Polyamine	2.53228	4.67714e-32	0.712585	-0.488866	insig
MEDP128	Diethanolamine	Polyamine	0.254874	0.396014	1.04183	0.0591224	insig
MEDP129	Phenethylamine	Polyamine	2.32182	1.8318e-20	1.09716	0.133778	insig
MEDP130	4-Nitrophenol	Phenols And Its Derivatives	0.651791	0.00108008	0.884656	-0.176811	insig
MEDP134	Inositol	Carbohydrate metabolomics	0.671294	2.99207e-05	0.850157	-0.234199	insig
MEDP135	Myoinositol	Carbohydrate metabolomics	0.66724	6.57208e-05	0.857564	-0.221683	insig
MEDP140	Vanillin	Phenols And Its Derivatives	0.616367	0.0390846	1.24471	0.315807	insig
MEDP145	1,7-Dimethylxanthine	Nucleotide metabolomics	0.686215	0.00666395	2.38269	1.25259	insig
MEDP147	1-Methylhistidine	Amino Acid metabolomics	0.708601	0.00770567	1.20194	0.265365	insig
MEDP150	2'-Deoxyinosine	Nucleotide metabolomics	0.201947	0.00775054	1.49242	0.577655	insig
MEDP152	3'-Aenylic Acid	Nucleotide metabolomics	0.61696	0.262148	1.34713	0.42989	insig
MEDP153	3-Methylxanthine	Nucleotide metabolomics	0.672395	0.0276698	2.16442	1.11398	insig
MEDP154	5,6-Dihydro-5-Methyluracil	Nucleotide metabolomics	0.830119	0.0039987	1.15299	0.205383	insig
MEDP156	5-Methyluridine	Nucleotide metabolomics	1.59283	9.17673e-09	1.18951	0.250362	insig
MEDP157	7-Methylxanthine	Nucleotide metabolomics	0.759334	0.00355673	1.14392	0.193985	insig
MEDP158	8-Hydroxyguanosine	Nucleotide metabolomics	0.0756781	0.0962365	1.62362	0.699217	insig
MEDP159	Adenine	Nucleotide metabolomics	0.717761	0.0424183	1.0884	0.122203	insig
MEDP160	Adenosine	Nucleotide metabolomics	2.14683	3.12704e-11	0.567471	-0.817382	insig
MEDP164	Cytidine-5-Monophosphate	Nucleotide metabolomics	0.660728	0.464155	0.943502	-0.0839025	insig
MEDP171	Inosine	Nucleotide metabolomics	1.08164	0.0980933	107.794	6.75213	insig
MEDP174	Purine	Nucleotide metabolomics	1.99501	1.70553e-13	1.1437	0.193712	insig
MEDP177	Thymine	Nucleotide metabolomics	1.03433	0.000470663	1.1145	0.156398	insig
MEDP178	Uracil	Nucleotide metabolomics	0.856571	0.000757962	1.29131	0.368841	insig
MEDP184	3,3',5-Triiodo-L-Thyronine	Hormones	2.21465	5.35299e-17	1.36289	0.446669	insig
MEDP186	L-Thyroxine	Hormones	1.95652	2.75387e-13	1.3142	0.394184	insig
MEDP188	Norepinephrine	Hormones	1.39445	5.9642e-07	1.26346	0.337377	insig
MEDP205	L-Carnitine	Camitine	0.308236	0.172435	0.94274	-0.0850687	insig
MEDP211	Melatonin	Tryptamines And Its Derivatives	0.402992	0.257352	1.12151	0.165441	insig
MEDP224	D-Fructose	Carbohydrate metabolomics	0.695006	2.22707e-09	0.794648	-0.331612	insig
MEDP227	D-Mannose	Carbohydrate metabolomics	0.692137	4.68449e-09	0.801187	-0.319788	insig
MEDP229	Lactose	Carbohydrate metabolomics	1.04636	0.00283665	0.730279	-0.453479	insig
MEDP230	Maltose	Carbohydrate metabolomics	0.676638	0.00591195	0.871879	-0.1978	insig
MEDP232	N-Acetyl-D-Glucosamine	Carbohydrate metabolomics	0.0888521	0.252448	1.08808	0.121782	insig
MEDP233	Raffinose	Carbohydrate metabolomics	0.433711	0.0656711	0.796726	-0.327844	insig
MEDP236	Gluconic Acid	Carbohydrate metabolomics	1.68838	1.11253e-09	1.16195	0.216546	insig
MEDP239	L-Ascorbate	CoOthersEnzyme Factor & vitamin	0.44685	0.000147823	1.29376	0.371575	insig
MEDP242	Nicotinamide	CoOthersEnzyme Factor & vitamin	0.138641	0.927091	0.979579	-0.029766	insig
MEDP246	Nicotinic Acid	CoOthersEnzyme Factor & vitamin	1.07853	0.00045578	1.48711	0.572514	insig
MEDP247	Nicotinuric Acid	CoOthersEnzyme Factor & vitamin	0.549518	0.0538362	1.16729	0.223159	insig
MEDP249	Pantothenol	CoOthersEnzyme Factor & vitamin	0.429022	0.775558	0.913419	-0.130652	insig
MEDP250	Riboflavin	CoOthersEnzyme Factor & vitamin	0.144423	0.178787	1.29716	0.375355	insig
MEDP251	Trigonelline	CoOthersEnzyme Factor & vitamin	0.727214	0.0531172	2.14942	1.10394	insig
MEDP270	3-Indolebutyric Acid	Indole And Its Derivatives	0.424751	0.0734983	1.24123	0.311776	insig
MEDP271	3-Indolepropionic Acid	Indole And Its Derivatives	0.208442	0.794027	0.886507	-0.173796	insig
MEDP272	5-Hydroxyindole-3-Acetic Acid	Indole And Its Derivatives	0.210639	0.971878	1.0063	0.00906133	insig
MEDP274	Indole-2-Carboxylic Acid	Indole And Its Derivatives	0.953992	0.00329105	1.29229	0.369927	insig
MEDP275	Indole-3-Acetic Acid	Indole And Its Derivatives	0.140775	0.122229	1.31518	0.39526	insig
MEDP276	Indole-3-Carboxaldehyde	Indole And Its Derivatives	0.138159	0.70444	1.04784	0.067417	insig
MEDP277	Methyl Indole-3-Acetate	Indole And Its Derivatives	0.0598375	0.273982	1.26357	0.337507	insig
MEDP285	2,6-Diaminooimelic Acid	Organic Acid And Its Derivatives	0.142434	0.789538	1.02124	0.0303259	insig
MEDP291	3,7-Dimethyluric Acid	Organic Acid And Its Derivatives	0.540501	0.00383878	2.76465	1.4671	insig
MEDP294	3-Methylcrotonyl Glycine	Organic Acid And Its Derivatives	0.341066	0.187102	1.19832	0.261017	insig
MEDP295	4-Acetamidobutyric Acid	Organic Acid And Its Derivatives	0.127892	0.336919	1.06808	0.0950161	insig
MEDP296	4-Guanidinobutyric Acid	Organic Acid And Its Derivatives	0.075689	0.886733	0.99224	-0.0112391	insig
MEDP297	5-Aminovaleric Acid	Organic Acid And Its Derivatives	0.264114	0.492924	1.05127	0.0721352	insig
MEDP298	6-Aminocaproic Acid	Organic Acid And Its Derivatives	0.594382	0.0713167	1.09852	0.135561	insig
MEDP299	7-Methyluric Acid	Organic Acid And Its Derivatives	0.434589	0.243128	1.01582	0.0226479	insig
MEDP303	Chlorogenic Acid	Organic Acid And Its Derivatives	0.335977	0.280171	1.53392	0.617222	insig
MEDP305	Creatinine	Organic Acid And Its Derivatives	1.25052	2.28044e-06	1.2731	0.348345	insig
MEDP307	Dl-2-Aminooctanoic Acid	Organic Acid And Its Derivatives	0.633303	0.0315593	1.22873	0.297172	insig
MEDP310	D-Pipecolinic Acid	Organic Acid And Its Derivatives	1.11216	0.000174477	1.18526	0.245199	insig
MEDP313	Guanidineacetic Acid	Organic Acid And Its Derivatives	0.262928	0.770246	1.02364	0.0337152	insig
MEDP315	Hippuric Acid	Organic Acid And Its Derivatives	0.345951	0.607216	1.10609	0.145468	insig
MEDP316	Homovanillic Acid	Organic Acid And Its Derivatives	0.865081	0.0135439	1.10992	0.150458	insig
MEDP317	Hydrocinnamic Acid	Organic Acid And Its Derivatives	1.33723	6.89962e-05	1.2596	0.332966	insig
MEDP321	L-Dihydroorotic Acid	Organic Acid And Its Derivatives	0.439382	2.18059e-10	1.39963	0.485043	insig
MEDP322	L-Homoserine	Organic Acid And Its Derivatives	0.445489	0.206288	1.0671	0.0936919	insig
MEDP325	Maleic Acid	Organic Acid And Its Derivatives	1.24612	7.40622e-06	1.35446	0.437714	insig
MEDP326	N'-Formylkynurenine	Organic Acid And Its Derivatives	0.386969	0.237536	0.786247	-0.346946	insig
MEDP328	P-Aminohippuric Acid	Organic Acid And Its Derivatives	0.335848	0.0968625	1.15601	0.20915	insig
MEDP330	Sebacate	Organic Acid And Its Derivatives	1.0914	2.99904e-08	1.58122	0.661035	insig
MEDP332	Cinnamic Acid	Organic Acid And Its Derivatives	1.15438	5.58012e-05	1.15072	0.202535	insig
MEDP333	Uric Acid	Organic Acid And Its Derivatives	0.20862	0.0640494	1.08515	0.117901	insig
MEDP336	Lysopc 14:0	LipidsOthersPhospholipid	1.54976	4.57962e-08	1.49978	0.584752	insig
MEDP338	Lysopc 16:0	LipidsOthersPhospholipid	2.58481	1.50009e-24	1.13154	0.178284	insig
MEDP340	Lysopc 16:1	LipidsOthersPhospholipid	1.73659	1.13574e-09	1.57579	0.656072	insig
MEDP342	Lysopc 18:0	LipidsOthersPhospholipid	2.01983	7.40506e-14	1.26275	0.336567	insig
MEDP344	Lysopc 18:1	LipidsOthersPhospholipid	1.86404	1.80658e-10	1.23207	0.301089	insig
MEDP346	Lysopc 18:2	LipidsOthersPhospholipid	1.2432	2.78403e-05	1.10013	0.137673	insig
MEDP350	Lysopc 20:1	LipidsOthersPhospholipid	1.63485	1.64236e-07	1.57041	0.651141	insig
MEDP352	Lysopc 20:2	LipidsOthersPhospholipid	1.4762	2.04153e-08	1.40027	0.485702	insig
MEDP361	4-Hydroxybenzaldehyde	Benzene and substituted derivatives	0.966614	0.00442494	1.12616	0.171408	insig
MEDP365	Cotinine N-Oxide	Benzene and substituted derivatives	0.56561	0.139626	1.18884	0.249552	insig
MEDP368	Taurocholic Acid Sodium Salt Hydrate	Organic Acid And Its Derivatives	1.51904	1.07884e-07	1.06119	0.0856764	insig
MEDP370	2-(Formylamino)Benzoic Acid	Benzene and substituted derivatives	1.47113	2.0926e-07	1.16773	0.223702	insig
MEDP371	Acetaminophen Glucuronide	Carbohydrate metabolomics	1.30217	1.1666e-06	1.44975	0.535802	insig
MEDP372	Uridine 5-Monophosphate	Nucleotide metabolomics	1.10305	0.000276274	0.731071	-0.451916	insig
MEDP373	N-Acetylglycine	Amino Acid metabolomics	0.062594	0.897981	1.00426	0.00612746	insig
MEDP374	Cyclic Amp	Nucleotide metabolomics	0.283245	1.60255e-06	1.29654	0.374669	insig
MEDP378	N6-Succinyl Adenosine	Nucleotide metabolomics	1.12315	1.613e-05	1.26064	0.334161	insig
MEDP380	2-(Dimethylamino)Guanosine	Nucleotide metabolomics	1.24762	4.66955e-06	1.26076	0.334296	insig
MEDP381	7-Methylguanine	Nucleotide metabolomics	1.40901	1.04857e-06	1.11984	0.163289	insig
MEDP384	Isoxanthopterin	Pteridines and derivatives	1.18726	0.000191138	1.39773	0.483083	insig
MEDP386	N-Acetylthreonine	Amino Acid metabolomics	0.30439	0.0890922	1.13424	0.181723	insig
MEDP387	H-Homoarg-Oh	Amino Acid metabolomics	0.0652609	0.724517	0.970708	-0.0428901	insig
MEDP389	Pantetheine	CoOthersEnzyme Factor & vitamin	0.727072	0.043069	0.966144	-0.0496897	insig
MEDP391	Menaquinone	CoOthersEnzyme Factor & vitamin	0.850746	3.78925e-09	0.683631	-0.548711	insig
MEDP394	4-Hydroxyretinoic Acid	CoOthersEnzyme Factor & vitamin	0.686913	0.042033	1.20615	0.270407	insig
MEDP395	L-Pipecolic Acid	Amino Acid metabolomics	0.467647	0.328626	1.13359	0.180899	insig
MEDP401	5'-Deoxy-5'-(Methylthio) Adenosine	Nucleotide metabolomics	1.63755	1.13319e-09	0.607936	-0.718009	insig
MEDP404	Sarcosine	Amino Acid metabolomics	2.50821	2.38535e-26	0.733731	-0.446677	insig
MEDP405	3-Aminoisobutanoic Acid	Amino Acid metabolomics	0.782111	0.00242506	1.14768	0.198715	insig
MEDP408	11-Cis-Retinol	CoOthersEnzyme Factor & vitamin	2.14773	3.55443e-17	1.43976	0.525832	insig
MEDP410	Trans-Citridic Acid	Organic Acid And Its Derivatives	0.438328	1.72501e-05	1.26077	0.3343	insig
MEDP416	6-Phosphogluconic Acid Trisodium Salt	Carbohydrate metabolomics	0.300976	0.184292	1.07293	0.101551	insig
MEDP428	Cholesterol	Lipids	0.955576	0.000751734	1.20145	0.264772	insig
MEDP429	Punicic Acid	Lipids_Fatty Acids	1.3418	3.47797e-07	1.09687	0.133389	insig
MEDP430	2-Aminoadipic Acid	Organic Acid And Its Derivatives	0.118844	0.356575	0.932076	-0.101481	insig
MEDP431	Hordenine	Benzene and substituted derivatives	1.1947	2.96024e-05	1.15778	0.211359	insig
MEDP434	Lysopc 17:0	LipidsOthersPhospholipid	2.01714	6.94489e-14	1.58485	0.664343	insig
MEDP435	6-Methylmercaptopurine	Nucleotide metabolomics	2.50781	4.42525e-23	1.08114	0.112557	insig
MEDP437	Ergothioneine	Organic Acid And Its Derivatives	0.576475	0.0100442	1.5879	0.667119	insig
MEDP440	Methoxyindoleacetic Acid	Indole And Its Derivatives	0.497629	0.126922	1.05678	0.079672	insig
MEDP442	Sn-Glycero-3-Phosphocholine	Cholines	0.201353	0.592416	1.06624	0.0925266	insig
MEDP443	10-Formyl-Thf	Pteridines and derivatives	0.486117	0.783156	0.972133	-0.040775	insig
MEDP450	P-Aminobenzoate	Benzene and substituted derivatives	0.647341	0.0511852	1.18638	0.246564	insig
MEDP453	Indole	Indole And Its Derivatives	1.16123	0.00021536	1.11509	0.157165	insig
MEDP454	Isoquinoline	Benzene and substituted derivatives	0.868407	0.0094345	1.30338	0.38226	insig
MEDP456	Piperidine	Benzene and substituted derivatives	0.499743	0.11934	1.09344	0.128871	insig
MEDP457	5-Aminolevulinate	Organic Acid And Its Derivatives	0.849556	0.00772555	1.153	0.205399	insig
MEDP494	Lysopc 15:0	LipidsOthersPhospholipid	1.90882	4.95175e-12	1.53067	0.614162	insig
MEDP498	Lysopc 18:3	LipidsOthersPhospholipid	2.26569	2.22983e-17	1.19418	0.25602	insig
MEDP507	2-Hydroxycinnamic acid	Benzene and substituted derivatives	0.796851	0.021555	1.09729	0.133939	insig
MEDP509	trans-3-Indoleacrylic acid	Organic Acid And Its Derivatives	1.04963	0.000556065	1.13324	0.180448	insig
MEDP510	Acetyl-L-carnitine	Camitine	1.42002	5.6269e-07	1.16578	0.221294	insig
MEDP513	Hexadecanamide	Lipids_Fatty Acids	0.684715	0.0208939	1.48224	0.567777	insig
MEDP514	Thiamine	CoOthersEnzyme Factor & vitamin	0.304005	0.0980167	1.73458	0.794589	insig
MEDP517	Palmitoylcarnitine	Camitine	0.0416669	0.155966	1.27442	0.349839	insig
MEDP518	DL-Stachydrine	Organic Acid And Its Derivatives	2.31313	1.7237e-23	1.88746	0.916444	insig
MEDP519	L-Norleucine	Amino Acid metabolomics	1.2528	7.13801e-05	1.13906	0.187842	insig
MEDP523	DL-Carnitine	Camitine	0.739273	0.00730677	0.866816	-0.206202	insig
MEDP525	N-Acetyl-L-alanine	Organic Acid And Its Derivatives	0.061252	0.789293	0.974836	-0.0367683	insig
MEDP529	Indole-3-acetamide	Indole And Its Derivatives	0.836282	0.00128695	1.24741	0.318935	insig
MEDP535	Triethyl phosphate	Organic Acid And Its Derivatives	0.445862	0.317992	1.54956	0.63186	insig
MEDP537	PAF C-16	Lipids	2.04271	2.75166e-14	1.24637	0.317728	insig
MEDP540	7,8-dihydro-L-Biopterin	Pteridines and derivatives	0.553661	0.581238	0.963149	-0.0541684	insig
MEDP541	δ-Valerolactam	Pyridine And Pyridine Derivatives	0.198913	0.690733	1.07054	0.0983384	insig
MEDP545	2-Pyrrolidinone	Benzene and substituted derivatives	0.0294145	0.55148	1.04208	0.05946	insig
MEDP546	Oxindole	Indole And Its Derivatives	0.026862	0.00317031	1.57443	0.654829	insig
MEDP561	Farnesene	Lipids_Fatty Acids	1.14385	0.000245906	1.08624	0.119349	insig
MEDP574	Oleamide	Lipids_Fatty Acids	0.676599	0.0360355	1.46897	0.554803	insig
MEDP575	5-amino-1-[3,4-dihydroxy-5-(hydroxymethyl)oxolan-2-yl]imidazole-4-carboxamide	Nucleotide metabolomics	0.515905	0.0185487	0.709882	-0.494349	insig
MEDP576	N1-Acetylspermine	Organic Acid And Its Derivatives	1.07949	0.000748444	1.60697	0.684345	insig
MEDP577	Isobutyryl carnitine	Camitine	0.393326	0.169611	1.11448	0.156371	insig
MEDP578	alpha-Cadinene	Lipids_Fatty Acids	0.460398	0.155893	0.963669	-0.0533908	insig
MEDP579	gamma-Muurolene	Lipids_Fatty Acids	0.917533	0.00192423	1.11426	0.156081	insig
MEDP581	10E,12Z-Octadecadienoic acid	Lipids_Fatty Acids	0.287747	0.0361699	0.755398	-0.404691	insig
MEDP583	Asp-Phe methyl ester	Organic Acid And Its Derivatives	1.48958	4.92591e-08	1.30921	0.388698	insig
MEDP584	Pterine	Pteridines and derivatives	0.740827	0.0338681	1.09625	0.132581	insig
MEDP585	Stearidonic Acid	Lipids_Fatty Acids	0.666065	0.0419203	1.19638	0.258675	insig
MEDP586	N-Acetylphenylalanine	Organic Acid And Its Derivatives	0.200761	0.848284	1.013	0.0186272	insig
MEDP587	N-Alpha-acetyllysine	Organic Acid And Its Derivatives	1.04802	0.000142566	0.673741	-0.569733	insig
MEDP590	p-Mentha-1,3,8-triene	Lipids_Fatty Acids	0.330787	0.430643	0.916885	-0.125187	insig
MEDP594	Dihydroactinidiolide	Benzene and substituted derivatives	0.351567	0.0185856	1.61553	0.69201	insig
MEDP598	2'-Hydroxy-5'-methylacetophenone	Benzene and substituted derivatives	1.70652	1.62844e-08	1.24981	0.321712	insig
MEDP602	1-(4-Methoxyphenyl)-2-propanone	Benzene and substituted derivatives	0.970301	7.01754e-05	1.30649	0.385699	insig
MEDP603	Cuminaldehyde	Lipids_Fatty Acids	1.22377	1.91156e-05	1.16278	0.217581	insig
MEDP606	2-(3,4-dimethoxyphenyl)ethanamine	Benzene and substituted derivatives	0.938396	0.00632464	1.11132	0.152272	insig
MEDP611	N-Acetyl-L-Histidine	Organic Acid And Its Derivatives	0.882942	0.000549938	1.3046	0.383607	insig
MEDP612	(S)-2,3-epoxysqualene	Terpenoid	0.602631	0.0856014	1.20349	0.267226	insig
MEDP617	2-Furoylglycine	Amino Acid metabolomics	0.198113	0.063088	1.39254	0.477723	insig
MEDP618	2-Methylbutyroylcarnitine	Lipids_Fatty Acids	0.485906	0.245301	1.10245	0.140712	insig
MEDP627	Isonicotinic acid	Organic Acid And Its Derivatives	0.430594	0.129205	1.05159	0.0725673	insig
MEDP631	Dimethyl fumarate	Lipids_Fatty Acids	2.20426	2.82366e-23	1.89603	0.922978	insig
MEDP632	beta-Cubebene	Lipids_Fatty Acids	0.272488	0.30366	0.970513	-0.0431809	insig
MEDP634	cis-gondoic acid	Lipids_Fatty Acids	0.17931	0.123908	1.26124	0.334841	insig
MEDP636	Furfural	Organic Acid And Its Derivatives	0.512361	0.000649983	1.08387	0.116193	insig
MEDP637	L-phenylalanyl-L-proline	Organic Acid And Its Derivatives	1.079	7.02482e-05	1.32422	0.40514	insig
MEDP638	LysoPE(16:1(9Z)-0:0)	Lipids_Fatty Acids	0.788901	0.00292185	1.39868	0.484063	insig
MEDP642	3-Hydroxy-DL-kynurenine	Amino Acid metabolomics	0.139127	0.21795	1.10107	0.13891	insig
MEDP652	Methyl cinnamate	Benzene and substituted derivatives	0.604588	0.0333527	1.03025	0.0429875	insig
MEDP653	Benzylcinnamate	Benzene and substituted derivatives	0.878019	0.000678663	1.08526	0.118036	insig
MEDP654	2-Phenylacetamide	Benzene and substituted derivatives	0.473065	0.21394	1.28254	0.359007	insig
MEDP656	Isoamyl butyrate	Fatty acyls	0.433662	7.02954e-11	1.41742	0.50327	insig
MEDP658	Ethyl dodecanoate	Fatty acyls	0.403389	0.222756	1.03134	0.0445185	insig
MEDP659	Propylpropionate	Fatty acyls	0.716161	1.0566e-05	0.752403	-0.410423	insig
MEDP660	1,4-Xylene	Benzene and substituted derivatives	0.52664	0.188294	0.973089	-0.0393568	insig
MEDP668	m-Cresol	Phenols And Its Derivatives	0.672044	0.040578	0.945744	-0.0804779	insig
MEDP670	2,6-Dimethylpyridine	Pyridine And Pyridine Derivatives	0.164631	0.659461	0.976433	-0.0344069	insig
MEDP672	Cyclohexylamine	Amines	0.0358056	0.399106	1.15557	0.208599	insig
MEDP676	Butyl 3-methylbutanoate	Fatty acyls	0.405817	5.36638e-12	1.48613	0.57156	insig
MEDP677	Butylamine	Amines	0.57697	0.0235015	0.885453	-0.175512	insig
MEDP681	2,2,2-Trichloroethanol	Alcohol	0.0695678	0.126424	0.959642	-0.0594315	insig
MEDP682	Hydroxyacetone	Ketones	0.255592	0.0150137	1.21173	0.277063	insig
MEDP685	Methylcysteine	Amino Acid metabolomics	0.590828	0.0977069	1.07287	0.10147	insig
MEDP686	2-Acetylfuran	Heterocyclic compound	1.12354	3.96747e-05	1.11489	0.156901	insig
MEDP688	Benzophenone	Benzene and substituted derivatives	1.59079	1.45519e-08	1.09436	0.130081	insig
MEDP689	TranexamicAcid	Organic Acid And Its Derivatives	0.763806	3.17787e-09	0.768196	-0.380454	insig
MEDP695	Methyl tetradecanoate	Fatty acyls	0.916172	0.00189101	0.952181	-0.0706925	insig
MEDP697	2,6-Di-tert-butyl-4-methylphenol	Benzene and substituted derivatives	1.42783	0.000120196	2.07028	1.04983	up
MEDP701	(E)-2-Octen-1-ol	Alcohol	0.354003	0.13858	1.20198	0.265418	insig
MEDP707	2-Pentadecanone	Ketones	0.0785712	0.762011	1.0032	0.00460763	insig
MEDP709	Methyl dihydrojasmonate	Organic Acid And Its Derivatives	0.731704	0.0178867	1.02181	0.0311248	insig
MEDP710	Hexyl butyrate	Fatty acyls	1.50919	7.90846e-08	0.84415	-0.244429	insig
MEDP716	cis-Citral	Aldehyde	1.19093	7.91926e-05	1.14127	0.190637	insig
MEDP718	Methylisobutyrate	Organic Acid And Its Derivatives	2.43418	2.60615e-14	1.83568	0.876318	insig
MEDP719	N-Nitrosodiethylamine	Polyamine	2.33448	1.08191e-12	1.83091	0.872558	insig
MEDP724	3,5-Dinitrosalicylic acid	Organic Acid And Its Derivatives	0.30049	0.370745	1.01789	0.025578	insig
MEDP729	Barbituric acid	Heterocyclic compound	0.263789	0.24473	1.15656	0.209845	insig
MEDP733	o-Xylene	Benzene and substituted derivatives	0.417305	0.287207	0.979356	-0.030095	insig
MEDP736	1,3-diisopropylbenzene	Benzene and substituted derivatives	1.58773	1.21284e-09	1.0816	0.113167	insig
MEDP738	carene	Heterocyclic compound	1.91716	3.39662e-12	1.10866	0.148811	insig
MEDP739	Hexyl??Acetate	Fatty acyls	1.03077	0.00388133	0.893774	-0.162019	insig
MEDP740	Farnesol	Alcohol	0.447319	0.338885	0.933307	-0.0995769	insig
MEDP742	Terpinolene	Terpenoid	1.12107	0.000249537	1.05034	0.0708614	insig
MEDP746	gamma-Terpinene	Terpenoid	0.399259	0.768674	0.945879	-0.0802725	insig
MEDP747	alpha-Terpinene	Terpenoid	2.23117	1.54954e-17	1.15033	0.202052	insig
MEDP752	DL-Leucine	Amino Acid metabolomics	0.321656	0.326548	1.01911	0.0273068	insig
MEDP759	Glycyrrhetinic acid	Terpenoid	0.394262	0.391861	0.522321	-0.936992	insig
MEDP760	9-Fluorenone	Ketones	1.67519	4.4685e-09	1.25251	0.324826	insig
MEDP765	3-(Methylthio)-1-propanol	Alcohol	0.473083	0.245282	0.97527	-0.0361257	insig
MEDP767	Aspirin	Organic Acid And Its Derivatives	0.707856	9.8043e-11	0.776206	-0.365488	insig
MEDP778	Ethyl butyrate	Fatty acyls	0.684211	0.000477741	0.768242	-0.380367	insig
MEDP781	2-Undecanone	Ketones	2.1391	1.11912e-12	1.54412	0.626783	insig
MEDP783	10-UNDECENOIC ACID	Fatty acyls	1.76722	9.69303e-19	1.45644	0.542443	insig
MEDP784	Undecanal	Aldehyde	2.13177	2.14497e-12	1.53984	0.622779	insig
MEDP789	2-Pentyl-3-phenyl-2-propenal	Aldehyde	0.437757	0.130609	1.01285	0.0184232	insig
MEDP791	4-aminophenol	Phenols And Its Derivatives	0.510982	0.0768304	1.11853	0.1616	insig
MEDP792	PYRROLIDINE	Heterocyclic compound	0.855465	0.00439469	1.13184	0.178668	insig
MEDP794	Octanal	Aldehyde	0.518736	0.0660859	1.26488	0.339005	insig
MEDP796	Pyrene	Benzene and substituted derivatives	1.15027	3.56418e-05	1.03227	0.045826	insig
MEDP799	(-)-Menthone	Ketones	0.536036	0.0639878	0.972685	-0.0399559	insig
MEDP811	2-(Methylthio)benzothiazole	Benzene and substituted derivatives	0.779621	0.78022	1.01726	0.024691	insig
MEDP812	5-METHYLFURFURAL	Aldehyde	0.318668	7.71927e-11	1.51566	0.599945	insig
MEDP814	METHYL VALERATE	Fatty acyls	0.594723	0.508089	0.963638	-0.0534375	insig
MEDP815	N-ETHYLACETAMIDE	Amines	0.860303	4.18742e-11	0.694361	-0.526242	insig
MEDP817	PROPYL HEXANOATE	Fatty acyls	0.303378	1.13381e-15	1.72787	0.788994	insig
MEDP818	1-PENTADECANOL	Alcohol	0.00621171	0.802317	0.995091	-0.00709941	insig
MEDP828	2-Methyl-1-propanol	Alcohol	0.269685	0.30798	1.11282	0.15422	insig
MEDP831	1-Aminopropan-2-ol	Alcohol	1.06343	0.000885392	2.68748	1.42626	up
MEDP836	Dibutyl phthalate	Benzene and substituted derivatives	0.286198	0.460704	0.988205	-0.0171174	insig
MEDP839	Pulegone	Ketones	1.33192	3.26158e-05	1.15931	0.21327	insig
MEDP843	ETHYL ISOBUTYRATE	Fatty acyls	0.758207	2.88937e-05	0.739527	-0.435325	insig
MEDP844	FURFURYL ALCOHOL	Alcohol	0.650716	0.00143452	0.887906	-0.17152	insig
MEDP845	1-Phenylethanol	Benzene and substituted derivatives	1.48775	6.1424e-12	0.811746	-0.3009	insig
MEDP853	Choline chloride	Others	0.941588	0.000397864	1.17271	0.229845	insig
MEDP855	caprate (10:0)	Lipids	0.0940989	0.752668	0.993548	-0.00933915	insig
MEDP856	Isobutyl decanoate	Fatty acyls	0.191124	0.544819	0.988692	-0.0164076	insig
MEDP859	glycylphenylalanine	Amino Acid metabolomics	0.978486	0.000622678	1.67453	0.743755	insig
MEDP860	L-Glutamic acid	Amino Acid metabolomics	0.181022	0.908021	1.01138	0.0163303	insig
MEDP863	proline betaine	Organic Acid And Its Derivatives	0.205478	0.670105	0.986042	-0.0202796	insig
MEDP865	Bisphenol propane	Benzene and substituted derivatives	0.00966923	0.892287	1.00388	0.00558273	insig
MEDP867	Vitamin E	CoOthersEnzyme Factor & vitamin	0.0343547	0.103297	1.07205	0.10037	insig
MEDP868	N-methylalanine	Amino Acid metabolomics	0.415212	0.121733	1.06326	0.08849	insig
MEDP871	sphinganine	Lipids	2.12377	2.583e-14	0.622566	-0.683701	insig
MEDP872	Glycerophosphatidylcholine	Lipids	0.773271	0.1159	0.856971	-0.222681	insig
MEDP873	3'-UMP	Nucleotide metabolomics	0.97239	0.000106174	1.20258	0.266128	insig
MEDP874	tryptophan betaine	Organic Acid And Its Derivatives	0.499498	0.0221082	0.715036	-0.483912	insig
MEDP876	O-Succinyl-L-Homoserine	Amino Acid metabolomics	0.579861	0.0665861	1.17506	0.232737	insig
MEDP877	Cytidine 5'-Diphosphocholine	Nucleotide metabolomics	0.772702	0.000127102	0.778821	-0.360637	insig
MEDP878	N-Methyl-L-Glutamate	Amino Acid metabolomics	0.143598	0.464918	0.943007	-0.0846599	insig
MEDP879	N-Methyl-D-Aspartic Acid	Amino Acid metabolomics	0.0254476	0.0416416	1.30028	0.378823	insig
MEDP881	Phosphocholine	Nucleotide metabolomics	2.48725	1.91744e-26	2.11944	1.08368	up
MEDP883	2,4-Dihydroxypteridine	Pteridines and derivatives	0.616737	0.110563	1.07172	0.0999275	insig
MEDP884	L-Methionine Sulfoximine	Organic Acid And Its Derivatives	0.641529	0.0781807	0.872535	-0.196715	insig
MEDP888	2'-Deoxycytidine 5'-Diphosphate	Nucleotide metabolomics	1.01421	0.00720776	0.87816	-0.187445	insig
MEDP889	Cortisol	Lipids	1.35067	6.05417e-06	1.47661	0.562286	insig
MEDP891	L-Tryptophanamide	Amino Acid metabolomics	1.64382	0.00176236	3.12476	1.64375	up
MEDP904	Oleate	Lipids	0.713359	0.0297695	1.49327	0.578474	insig

## Sheet: PCV and control  
The OPLS results of PCV and control
Index	Compounds	Class	VIP	P value	Fold_Change	Log2FC	Type
MEDN005	L-Threonine	Amino Acid metabolomics	1.30966	0.000767227	1.27522	0.350743	insig
MEDN007	L-Arginine	Amino Acid metabolomics	0.681427	0.109353	0.86115	-0.215664	insig
MEDN010	L-Citrulline	Amino Acid metabolomics	0.694732	0.120027	1.08283	0.114809	insig
MEDN011	L-Glutamic Acid	Amino Acid metabolomics	0.199997	0.429318	1.06004	0.0841185	insig
MEDN013	L-Isoleucine	Amino Acid metabolomics	0.632571	0.130773	0.905666	-0.142949	insig
MEDN017	L-Pyroglutamic Acid	Amino Acid metabolomics	0.985743	0.150013	1.34417	0.42672	insig
MEDN018	L-Serine	Amino Acid metabolomics	1.27463	0.0022357	1.16072	0.215024	insig
MEDN030	5-Hydroxy-L-Tryptophan	Amino Acid metabolomics	0.282318	0.932765	1.00668	0.00960363	insig
MEDN033	Asp-Phe	Amino Acid metabolomics	0.103094	0.307547	2.3683	1.24385	insig
MEDN041	Hexanoyl Glycine	Amino Acid metabolomics	0.361365	0.0897503	1.32129	0.401952	insig
MEDN042	L-Asparagine Anhydrous	Amino Acid metabolomics	0.202196	0.596062	0.975884	-0.0352189	insig
MEDN043	L-Carnosine	Amino Acid metabolomics	0.228102	0.126145	1.12843	0.174313	insig
MEDN045	L-Cysteine	Amino Acid metabolomics	0.891139	0.0138472	1.0849	0.117556	insig
MEDN046	L-Glutamine	Amino Acid metabolomics	0.803983	0.037233	1.06014	0.084253	insig
MEDN047	L-Homocitrulline	Amino Acid metabolomics	0.0388206	0.521721	0.920645	-0.119283	insig
MEDN051	Methionine Sulfoxide	Amino Acid metabolomics	0.641685	0.00104046	1.29423	0.372092	insig
MEDN055	N-Acetyl-L-Glutamic Acid	Amino Acid metabolomics	0.646277	0.0598116	1.25268	0.325021	insig
MEDN056	N-Acetyl-L-Leucine	Amino Acid metabolomics	0.611605	0.266701	1.10299	0.141422	insig
MEDN060	N-Isovaleroylglycine	Amino Acid metabolomics	0.1632	0.395817	0.870141	-0.20068	insig
MEDN061	N-Phenylacetylglycine	Amino Acid metabolomics	0.403002	0.640885	1.19146	0.252729	insig
MEDN065	O-Phospho-L-Serine	Amino Acid metabolomics	0.535057	0.761944	1.0459	0.0647441	insig
MEDN072	Trans-4-Hydroxy-L-Proline	Amino Acid metabolomics	0.0131816	0.976503	1.00135	0.00194949	insig
MEDN084	Benzoic Acid	Benzene and substituted derivatives	0.569452	0.365538	1.04938	0.0695418	insig
MEDN086	Terephthalic Acid	Benzene and substituted derivatives	0.537132	0.257372	1.01847	0.0264031	insig
MEDN087	(3,4-Dimethoxyphenyl) Acetic Acid	Benzene and substituted derivatives	0.893354	0.0146193	1.17143	0.228277	insig
MEDN090	2-Methoxybenzoic Acid	Benzoic Acid And Its Derivatives	1.81511	2.82613e-07	2.02184	1.01567	up
MEDN092	3,4-Dihydroxybenzeneacetic Acid	Benzene and substituted derivatives	0.375497	0.133941	1.05904	0.0827561	insig
MEDN093	3-Hydroxyanthranilic Acid	Benzoic Acid And Its Derivatives	0.675213	0.0354605	1.37953	0.464173	insig
MEDN097	P–Hydroxyphenyl Acetic Acid	Benzene and substituted derivatives	0.832303	0.0496902	1.34375	0.426261	insig
MEDN105	Taurocholic Acid	Bile Acids	0.80174	0.12003	2.10531	1.07403	insig
MEDN109	Hyodeoxycholic Acid	Bile Acids	0.235897	0.214479	0.612403	-0.707447	insig
MEDN110	Glycoursodeoxycholic Acid	Bile Acids	0.724569	0.0976238	0.668548	-0.580897	insig
MEDN112	Glycocholic Acid	Bile Acids	0.11312	0.671995	0.911801	-0.13321	insig
MEDN113	Glycochenodeoxycholic Acid	Bile Acids	0.593011	0.0669683	0.786868	-0.345806	insig
MEDN115	Chenodeoxycholic Acid	Bile Acids	0.540316	0.398319	1.23264	0.301748	insig
MEDN124	Protocatechuic Acid	Phenols And Its Derivatives	1.50161	0.00331919	1.61958	0.695618	insig
MEDN139	1-Methylxanthine	Nucleotide metabolomics	1.49386	0.000886482	4.75863	2.25055	up
MEDN140	2,6-Dihydroxypurine	Nucleotide metabolomics	1.00634	0.00411479	1.3932	0.478398	insig
MEDN147	5-Methylcytosine	Nucleotide metabolomics	0.13466	0.50664	1.03466	0.0491549	insig
MEDN163	Hypoxanthine	Nucleotide metabolomics	0.127926	0.0471796	1.36702	0.451036	insig
MEDN168	Thymidine	Nucleotide metabolomics	0.249605	0.515627	1.09707	0.133658	insig
MEDN171	Uridine	Nucleotide metabolomics	0.540942	0.100484	1.09804	0.134927	insig
MEDN172	Β-Nicotinamide Mononucleotide	Nucleotide metabolomics	0.201397	0.87479	0.991429	-0.0124192	insig
MEDN178	Epinephrine	Hormones	0.296767	0.378321	1.01381	0.0197914	insig
MEDN196	Pyrroloquinoline Quinone	Organic Acid And Its Derivatives	0.728191	0.0383903	1.5372	0.620303	insig
MEDN198	Citric Acid	Amino Acid metabolomics	1.11515	5.2366e-05	1.5438	0.626485	insig
MEDN201	Succinic Acid	Amino Acid metabolomics	1.76371	0.000160057	1.34044	0.422709	insig
MEDN202	A-Ketoglutaric Acid	Amino Acid metabolomics	1.28593	0.0105892	1.41688	0.502722	insig
MEDN209	Tryptamine	Tryptamines And Its Derivatives	0.401509	0.890376	1.01422	0.0203723	insig
MEDN213	D-Sorbitol	Carbohydrate metabolomics	0.458824	0.388198	0.914906	-0.128305	insig
MEDN220	D-Glucose	Carbohydrate metabolomics	0.458377	0.27092	1.07571	0.105294	insig
MEDN224	D-Trehalose	Carbohydrate metabolomics	1.19887	0.000547695	0.840921	-0.249958	insig
MEDN226	D-Erythronolactone	Carbohydrate metabolomics	0.0242017	0.799057	1.00374	0.00539155	insig
MEDN228	D-Arabinose	Carbohydrate metabolomics	1.48699	5.73059e-05	1.43553	0.521586	insig
MEDN231	L-Fucose	Carbohydrate metabolomics	0.614981	0.0201614	1.4935	0.578696	insig
MEDN232	L-Rhamnose	Carbohydrate metabolomics	0.6936	0.00987669	1.62531	0.700712	insig
MEDN240	L-Gulonic-Γ-Lactone	Carbohydrate metabolomics	0.200759	0.765719	0.982491	-0.0254842	insig
MEDN241	Vitamin D3	CoOthersEnzyme Factor & vitamin	1.65273	8.91614e-10	1.71798	0.780714	insig
MEDN244	Orotic Acid	CoOthersEnzyme Factor & vitamin	0.514885	0.00890357	1.34961	0.432545	insig
MEDN245	Pantothenate	CoOthersEnzyme Factor & vitamin	1.11373	0.281927	1.12946	0.175636	insig
MEDN273	1,3-Dimethyluric Acid	Organic Acid And Its Derivatives	0.955715	0.00694949	5.21778	2.38344	insig
MEDN274	1,7-Dimethyluric Acid	Organic Acid And Its Derivatives	0.882222	0.00708407	5.15825	2.36688	insig
MEDN279	2-Aminoethanesulfinic Acid	Organic Acid And Its Derivatives	0.524225	0.117535	0.846255	-0.240835	insig
MEDN280	2-Aminoethanesulfonic Acid	Organic Acid And Its Derivatives	1.27629	0.035017	0.82218	-0.282474	insig
MEDN283	2-Hydroxybutanoic Acid	Organic Acid And Its Derivatives	0.649375	0.161804	1.11549	0.157673	insig
MEDN284	2-Hydroxyisocaproic Acid	Organic Acid And Its Derivatives	0.262709	0.361091	1.12754	0.173178	insig
MEDN285	2-Methylsuccinic Acid	Organic Acid And Its Derivatives	0.58172	0.0821304	1.17175	0.228663	insig
MEDN286	3,4,5-Trimethoxycinnamic Acid	Organic Acid And Its Derivatives	0.201542	0.149822	0.522506	-0.936482	insig
MEDN290	3-Hydroxy-3-Methyl Butyric Acid	Organic Acid And Its Derivatives	0.458394	0.398006	1.05312	0.0746755	insig
MEDN292	3-Hydroxybutyrate	Organic Acid And Its Derivatives	1.08791	0.0282326	1.59867	0.676869	insig
MEDN299	Adipic Acid	Organic Acid And Its Derivatives	1.18176	0.00801838	1.40197	0.487453	insig
MEDN300	Azelaic Acid	Organic Acid And Its Derivatives	1.08717	0.00253327	1.21632	0.282517	insig
MEDN301	Caffeic Acid	Organic Acid And Its Derivatives	0.799418	0.328417	1.26175	0.335428	insig
MEDN305	Creatine	Organic Acid And Its Derivatives	0.866591	0.0203451	0.79432	-0.332208	insig
MEDN311	Dodecanedioic Aicd	Organic Acid And Its Derivatives	0.431182	0.136594	1.33076	0.412251	insig
MEDN314	Glutaric Acid	Organic Acid And Its Derivatives	0.694992	0.0368846	1.21876	0.285419	insig
MEDN316	Guanidinoethyl Sulfonate	Organic Acid And Its Derivatives	0.423407	0.365818	0.980885	-0.0278443	insig
MEDN321	Kinic Acid	Organic Acid And Its Derivatives	1.14927	9.54112e-05	1.5012	0.586117	insig
MEDN322	Kinurenine	Organic Acid And Its Derivatives	0.641945	0.043776	1.10641	0.145892	insig
MEDN323	Kynurenic Acid	Organic Acid And Its Derivatives	0.796123	0.0661	1.16022	0.214404	insig
MEDN324	L-3-Phenyllactic Acid	Organic Acid And Its Derivatives	0.651032	0.0237902	1.28074	0.356978	insig
MEDN325	L-Lactic Acid	Organic Acid And Its Derivatives	2.28548	4.09736e-10	1.52823	0.611861	insig
MEDN333	Malonicacid	Organic Acid And Its Derivatives	1.09691	0.027715	1.59876	0.676958	insig
MEDN334	Mandelic Acid	Organic Acid And Its Derivatives	0.936363	0.0363132	1.36985	0.454018	insig
MEDN335	Methylmalonic Acid	Organic Acid And Its Derivatives	1.82862	0.000144741	1.34413	0.426676	insig
MEDN338	Phenyllactate (Pla)	Organic Acid And Its Derivatives	0.702075	0.0186931	1.28238	0.358823	insig
MEDN339	Phenylpyruvic Acid	Organic Acid And Its Derivatives	1.27818	0.0714393	1.21337	0.279021	insig
MEDN340	Pyrrole-2-Carboxylic Acid	Organic Acid And Its Derivatives	1.13746	0.00237105	1.43251	0.518546	insig
MEDN343	Shikimic Acid	Organic Acid And Its Derivatives	0.316421	0.802148	1.03933	0.05566	insig
MEDN344	Subericacid	Organic Acid And Its Derivatives	1.31092	0.000863414	1.23507	0.30459	insig
MEDN346	Vanillic Acid	Organic Acid And Its Derivatives	0.768979	0.151903	1.3526	0.435738	insig
MEDN351	12-Hete	Lipids	1.39548	0.262048	5.12813	2.35843	insig
MEDN352	O-Phosphorylethanolamine	LipidsOthersPhospholipid	1.53664	6.2232e-06	0.545824	-0.873492	insig
MEDN356	Lysops 22:6	LipidsOthersPhospholipid	2.10676	4.41988e-07	1.45908	0.545055	insig
MEDN360	Lysopg 18:1	LipidsOthersPhospholipid	1.99017	1.61265e-07	1.29618	0.374263	insig
MEDN362	Lysope 18:1	LipidsOthersPhospholipid	0.819206	0.0222843	1.20039	0.263502	insig
MEDN364	Lysope 18:0	LipidsOthersPhospholipid	1.38429	0.000185734	1.2541	0.326651	insig
MEDN366	Lysope 16:0	LipidsOthersPhospholipid	0.951198	0.00229604	1.17775	0.236029	insig
MEDN368	Lysope 14:0	LipidsOthersPhospholipid	0.238775	0.996742	0.99942	-0.000836795	insig
MEDN370	Lysopa 18:0	LipidsOthersPhospholipid	2.02087	2.46768e-07	1.33919	0.421356	insig
MEDN372	Lysopa 16:0	LipidsOthersPhospholipid	2.25405	5.96567e-08	1.38026	0.464938	insig
MEDN374	9-Hpode	Lipids	0.829576	0.0305364	0.667536	-0.583082	insig
MEDN375	13-HOTrE [13S-hydroxy-9Z,11E,15Z-octadecatrienoic acid]	Oxidized lipid	0.860441	0.000537215	1.23432	0.303716	insig
MEDN376	9,10-DiHOME [(±)9,10-dihydroxy-12Z-octadecenoic acid]	Oxidized lipid	0.158857	0.281492	1.12937	0.175523	insig
MEDN378	γ-Linolenic Acid(C18:3N6)	Lipids_Fatty Acids	1.21432	0.00739763	1.47951	0.565115	insig
MEDN380	Palmitoleic Acid (C16:1)	Lipids_Fatty Acids	0.74623	0.0803938	1.32496	0.405949	insig
MEDN381	Hexadecanoic Acid (C16:0)	Lipids_Fatty Acids	0.919226	0.0213246	1.10498	0.144019	insig
MEDN383	Linoleic Acid (C18:2N6C)	Lipids_Fatty Acids	0.406156	0.436909	1.05234	0.0736064	insig
MEDN385	Dodecanoic Acid(C12:0)	Lipids_Fatty Acids	0.884745	0.0652297	1.43741	0.523471	insig
MEDN388	Elaidic Acid (C18:1N9T)	Lipids_Fatty Acids	1.24993	0.0009342	1.26361	0.337556	insig
MEDN390	EPA [5Z,8Z,11Z,14Z,17Z-eicosapentaenoic acid]	Oxidized lipid	1.18918	0.00231586	1.79982	0.847855	insig
MEDN391	DHA [4Z,7Z,10Z,13Z,16Z,19Z-docosahexaenoic acid]	Oxidized lipid	1.07107	0.0301094	1.31985	0.40037	insig
MEDN394	Cis-11,14-Eicosadienoic Acid (C20:2)	Lipids_Fatty Acids	0.998559	0.00974282	1.4288	0.514809	insig
MEDN395	Cis-11,14,17-Eicosatrienoic Acid (C20:3)	Lipids_Fatty Acids	1.36338	0.000732127	1.07164	0.0998254	insig
MEDN399	Arachidic Acid(C20:0)	Lipids_Fatty Acids	0.711271	0.117998	1.19113	0.252331	insig
MEDN400	Α-Linolenic Acid(C18:3N3)	Lipids_Fatty Acids	1.13047	0.0157663	1.43407	0.52012	insig
MEDN403	Urocanic Acid	Organic Acid And Its Derivatives	0.497146	0.676953	0.719275	-0.475385	insig
MEDN406	3-(3-Hydroxyphenyl)Propionate Acid	Organic Acid And Its Derivatives	0.153801	0.525325	0.793728	-0.333284	insig
MEDN414	4-(Aminomethyl)-5-(Hydroxymethyl)-2-Methylpyridin-3-Ol	Others	0.140689	0.579631	1.03951	0.0559055	insig
MEDN429	3-Hydroxyhippuric Acid	Organic Acid And Its Derivatives	0.337201	0.081722	1.74039	0.799411	insig
MEDN430	Thiamine Triphosphate	CoOthersEnzyme Factor & vitamin	2.26827	3.94135e-10	1.13383	0.181206	insig
MEDN432	5-Hydroxyhexanoic Acid	Organic Acid And Its Derivatives	0.655686	0.182697	1.13176	0.178574	insig
MEDN434	Β-Pseudouridine	Nucleotide metabolomics	0.143115	0.79227	1.01092	0.0156691	insig
MEDN444	Hypoxanthine-9-β-D-Arabinofuranoside	Nucleotide metabolomics	0.38948	0.209011	2.4691	1.30399	insig
MEDN470	Oxoadipic Acid	Organic Acid And Its Derivatives	1.05873	0.0150545	1.21016	0.275195	insig
MEDN472	1-Methyluric Acid	Organic Acid And Its Derivatives	1.28403	0.00144545	3.28523	1.71599	up
MEDN478	Aminomalonic Acid	Organic Acid And Its Derivatives	1.52193	0.00078279	1.32518	0.406187	insig
MEDN481	2,4-Dihydroxybenzoic Acid	Benzene and substituted derivatives	1.07022	0.006095	1.97898	0.98476	insig
MEDN483	3-Methyl-2-Oxobutanoic Acid	Organic Acid And Its Derivatives	0.580936	0.0379801	1.11267	0.154029	insig
MEDN486	Palmitaldehyde	Lipids_Fatty Acids	1.30182	0.0192105	1.1612	0.21561	insig
MEDN487	Allysine	Organic Acid And Its Derivatives	0.155647	0.794487	1.01807	0.025835	insig
MEDN490	Fumaric Acid	Amino Acid metabolomics	0.417316	0.358911	0.965354	-0.0508694	insig
MEDN491	9-HOTrE [9S-hydroxy-10E,12Z,15Z-octadecatrienoic acid]	Oxidized lipid	1.1957	0.00471803	1.15776	0.211333	insig
MEDN494	8,15-Dihete	Lipids_Fatty Acids	0.652987	0.176632	1.25761	0.330686	insig
MEDN496	N-Acetylmethionine	Amino Acid metabolomics	0.0953651	0.74626	1.0278	0.0395562	insig
MEDN498	Ribulose-5-Phosphate	Carbohydrate metabolomics	1.51788	5.36456e-05	1.19044	0.2515	insig
MEDN499	Argininosuccinic acid	Organic Acid And Its Derivatives	1.26073	0.000108767	1.16563	0.221109	insig
MEDN502	2-Deoxyribose 1-Phosphate	Carbohydrate metabolomics	0.850971	0.0265553	0.912816	-0.131604	insig
MEDN506	N-Acetylglucosamine 1-Phosphate	Carbohydrate metabolomics	0.22416	0.658605	1.02271	0.0324007	insig
MEDN523	Indolelactic acid	Indole And Its Derivatives	1.38121	2.58904e-05	1.41911	0.504986	insig
MEDN524	Estrone	Hormones	0.644364	0.0116067	1.55793	0.639626	insig
MEDN528	(3-Methoxy-4-hydroxyphenyl)ethylene glycol sulfate	Organic Acid And Its Derivatives	0.622932	0.0381326	1.19882	0.261615	insig
MEDN530	Pimelic acid	Organic Acid And Its Derivatives	0.804595	0.0182348	1.45823	0.544216	insig
MEDN533	Xanthosine	Nucleotide metabolomics	0.110663	0.485221	1.05378	0.0755706	insig
MEDN538	UDP-glucose	Nucleotide metabolomics	2.41561	2.3701e-07	0.393764	-1.3446	down
MEDN540	1-Methylguanine	Nucleotide metabolomics	0.984337	0.000622083	1.31234	0.392138	insig
MEDN551	Indoleacrylic acid	Organic Acid And Its Derivatives	0.0954076	0.770872	1.07103	0.0989998	insig
MEDN553	2-Methylbenzoic acid	Benzene and substituted derivatives	0.413266	0.0404129	1.39819	0.483563	insig
MEDN555	Hydroxyphenyllactic acid	Carbohydrate metabolomics	1.39237	0.000614206	1.26099	0.334562	insig
MEDN560	MARMESIN	Carbohydrate metabolomics	0.742297	0.0413491	1.40279	0.488303	insig
MEDN562	INDOLE-3-CARBINOL	Indole And Its Derivatives	0.690547	0.105891	1.19027	0.251285	insig
MEDN563	DL-Benzylsuccinic acid	Lipids_Fatty Acids	0.7051	0.0781766	1.33247	0.414103	insig
MEDN568	2-Methylguanosine	Nucleotide metabolomics	0.0572701	0.341499	1.05841	0.0819049	insig
MEDN569	DL-o-Tyrosine	Organic Acid And Its Derivatives	0.175339	0.627077	0.967416	-0.0477912	insig
MEDN570	L-Erythrulose	Carbohydrate metabolomics	1.23101	0.0112517	1.2211	0.288182	insig
MEDN575	3-Hydroxypicolinic acid	Pyridine And Pyridine Derivatives	0.442869	0.589708	0.634762	-0.655713	insig
MEDN576	1,2,3-Trihydroxybenzene	Benzene and substituted derivatives	0.948695	0.0957113	2.48196	1.31148	insig
MEDN579	N-lactoyl-phenylalanine	Organic Acid And Its Derivatives	0.109529	0.643311	1.04432	0.0625607	insig
MEDN587	N-Acetylvaline	Organic Acid And Its Derivatives	0.249262	0.743997	0.949498	-0.0747628	insig
MEDN589	Cyclamic acid	Organic Acid And Its Derivatives	0.624244	0.130265	2.35847	1.23785	insig
MEDN593	D-(+)-Malic acid	Amino Acid metabolomics	0.899999	1.51668e-06	1.56625	0.647315	insig
MEDN602	deoxyguanosine 5'-monophosphate (dGMP)	Nucleotide metabolomics	0.221059	0.334524	1.20931	0.274181	insig
MEDN604	Tetradecanedioic acid	Lipids_Fatty Acids	0.657788	0.176757	1.36581	0.449759	insig
MEDN606	5-Methoxytryptophol	Indole And Its Derivatives	0.723857	0.0293059	1.13322	0.180433	insig
MEDN609	Uridine triphosphate (UTP)	Nucleotide metabolomics	0.533274	0.855743	1.03613	0.0512104	insig
MEDN611	6β-hydroxytestosterone	Hormones	0.222713	0.589541	1.02527	0.0359988	insig
MEDN615	Carbamoyl phosphate	Organic Acid And Its Derivatives	1.28731	1.61304e-05	0.50875	-0.97497	insig
MEDN620	Glucotropaeolin	Carbohydrate metabolomics	0.541139	0.0628872	0.943493	-0.0839157	insig
MEDN621	Indoxylsulfuric acid	Organic Acid And Its Derivatives	0.668232	0.197147	1.19555	0.257675	insig
MEDN622	Porphobilinogen	Organic Acid And Its Derivatives	1.36814	0.00491683	1.21832	0.284892	insig
MEDN623	Salicyluric acid	Benzene and substituted derivatives	0.847543	0.129695	1.41117	0.496893	insig
MEDN625	Formononetin	Carbohydrate metabolomics	0.839577	0.0954421	1.2307	0.299479	insig
MEDN632	N-Oleoyl Glycine	Organic Acid And Its Derivatives	2.43563	4.10901e-11	1.18938	0.250207	insig
MEDN647	Hydroquinone	Phenols And Its Derivatives	1.59786	0.000731583	2.00603	1.00435	up
MEDN649	Anthranilic acid	Benzene and substituted derivatives	1.07396	0.00375615	1.18397	0.243634	insig
MEDN651	Succinic anhydride	Organic Acid And Its Derivatives	0.876012	0.0127204	0.898938	-0.153706	insig
MEDN654	3-Methylsalicylic acid	Organic Acid And Its Derivatives	1.09397	0.0216766	0.924975	-0.112513	insig
MEDN656	Indoleacetaldehyde	Indole And Its Derivatives	0.404986	0.953215	1.00614	0.00883737	insig
MEDN657	D-Xylulose 5-phosphate	Carbohydrate metabolomics	0.717547	4.82941e-08	0.726891	-0.460189	insig
MEDN658	Hexadecanedioic acid	Lipids_Fatty Acids	0.544049	0.248754	1.31609	0.396262	insig
MEDN659	Pyrophosphate	Organic Acid And Its Derivatives	0.131777	0.376644	0.90313	-0.146994	insig
MEDN661	Vanillylmandelic acid	Benzene and substituted derivatives	1.1525	0.00136159	1.27045	0.345343	insig
MEDN662	Gamma-Glu-Leu	Organic Acid And Its Derivatives	0.803402	0.0529987	1.11651	0.158996	insig
MEDN675	Methylstearate	Fatty acyls	2.01982	5.11302e-08	1.31839	0.39878	insig
MEDN678	Ethylsalicylate	Organic Acid And Its Derivatives	1.71966	0.000334551	1.28611	0.363015	insig
MEDN679	Maltol	Heterocyclic compound	0.976613	0.00546281	1.44909	0.535147	insig
MEDN682	Octadecanamide	Fatty acyls	0.17172	0.774377	0.992652	-0.0106404	insig
MEDN694	2-nonanol	Alcohol	0.808483	0.034949	0.957769	-0.0622508	insig
MEDN698	1-Naphthol	Phenols And Its Derivatives	0.0558096	0.41861	1.02761	0.0392981	insig
MEDN704	Oxaloacetic acid	Organic Acid And Its Derivatives	0.118652	0.00762145	1.21661	0.282868	insig
MEDN706	Butyl??Acetate	Fatty acyls	0.138583	0.343101	1.39469	0.479943	insig
MEDN719	2-n-Pentylfuran	Heterocyclic compound	0.19621	0.664244	0.983091	-0.0246036	insig
MEDN725	Sorbic acid	Organic Acid And Its Derivatives	0.4053	0.338028	1.03221	0.0457296	insig
MEDN727	Methyl hexadecanoate	Fatty acyls	2.97351	1.93455e-18	1.26291	0.336746	insig
MEDN729	Phenoxyacetic acid	Benzene and substituted derivatives	0.484427	0.874819	1.05926	0.0830629	insig
MEDN731	4-tert-Octylphenol	Phenols And Its Derivatives	0.305644	0.482228	0.989306	-0.0155107	insig
MEDN732	RICINOLEIC ACID	Fatty acyls	0.251093	0.885976	0.987216	-0.0185628	insig
MEDN733	PHENYL-BETA-D-GLUCOPYRANOSIDE	Carbohydrate metabolomics	0.511254	0.197582	1.05586	0.0784136	insig
MEDN734	Cis-3-Hexenylacetate	Fatty acyls	1.0101	0.00637429	0.952516	-0.0701841	insig
MEDN736	2-(Methylthio)ethanol	Alcohol	1.20412	0.049412	1.16372	0.218748	insig
MEDN741	Methanesulfonic acid	Others	0.514125	0.173504	1.47338	0.559127	insig
MEDN743	2-Nonanone	Ketones	0.864512	0.0204147	0.960837	-0.0576369	insig
MEDN745	Propylparaben	Benzoic Acid And Its Derivatives	0.511712	0.261693	0.933351	-0.0995086	insig
MEDN747	2,4-Di-tert-butylphenol	Phenols And Its Derivatives	1.27206	0.00149102	0.943863	-0.0833507	insig
MEDN748	Methylparaben	Benzoic Acid And Its Derivatives	1.44636	0.00125778	0.868149	-0.203986	insig
MEDN750	(±)12-HEPE [(±)-12-hydroxy-5Z,8Z,10E,14Z,17Z-eicosapentaenoic acid]	Oxidized lipid	1.15882	0.0879204	2.25358	1.17222	insig
MEDN751	(±)12-HETE [(±)12-hydroxy-5Z,8Z,10E,14Z-eicosatetraenoic acid]	Oxidized lipid	1.14703	0.271716	7.15285	2.83852	insig
MEDN758	(±)4-HDHA [(±)4-hydroxy-5E,7Z,10Z,13Z,16Z,19Z-docosahexaenoic acid]	Oxidized lipid	1.44499	0.00206033	2.04588	1.03272	up
MEDN760	(±)5-HETE [(±)5-hydroxy-6E,8Z,11Z,14Z-eicosatetraenoic acid]	Oxidized lipid	1.9381	0.151921	0.651969	-0.617125	insig
MEDN763	(±)9-HETE [(±)-9-hydroxy-5Z,7E,11Z,14Z-eicosatetraenoic acid]	Oxidized lipid	1.88299	0.062651	2.05821	1.04139	insig
MEDN765	11,12-EET [(±)11,(12)-epoxy-5Z,8Z,14Z-eicosatrienoic acid]	Oxidized lipid	1.8418	0.0428673	1.66592	0.736321	insig
MEDN767	12,13-EpOME [(±)12(13)epoxy-9Z-octadecenoic acid]	Oxidized lipid	0.732542	0.0504029	1.38649	0.471434	insig
MEDN768	13-oxoODE [13-oxo-9Z,11E-octadecadienoic acid]	Oxidized lipid	1.80869	4.01841e-06	1.28127	0.357574	insig
MEDN769	14(S)-HDHA [14S-hydroxy-4Z,7Z,10Z,12E,16Z,19Z-docosahexaenoic acid]	Oxidized lipid	1.55829	0.174103	2.29164	1.19638	insig
MEDN771	15-oxoETE [15-oxo-5Z,8Z,11Z,13E-eicosatetraenoic acid]	Oxidized lipid	2.37099	3.9135e-06	3.42021	1.77408	up
MEDN776	5(S),15(S)-DiHETE [5S,15S-dihydroxy-6E,8Z,10Z,13E-eicosatetraenoic acid]	Oxidized lipid	1.1981	0.68173	1.12711	0.172627	insig
MEDN783	9,10-EpOME [(±)9,10-epoxy-12Z-octadecenoic acid]	Oxidized lipid	1.05456	0.00728222	1.20291	0.266524	insig
MEDN784	9-oxoODE [9-oxo-10E,12Z-octadecadienoic acid]	Oxidized lipid	0.619971	0.0801298	1.02812	0.0400084	insig
MEDN785	LTB4 [5S,12R-dihydroxy-6Z,8E,10E,14Z-eicosatetraenoic acid]	Oxidized lipid	0.168324	0.646641	1.11555	0.15776	insig
MEDN795	PGF2α [9α,11α,15S-trihydroxy-prosta-5Z,13E-dien-1-oic acid]	Oxidized lipid	0.533584	0.145084	1.15344	0.205945	insig
MEDN798	PGK1 [9,11-dioxo-15S-hydroxy-prost-13E-en-1-oic acid]	Oxidized lipid	0.942651	0.00476389	1.11738	0.160126	insig
MEDN806	Nα-Acetyl-L-glutamine	Carboxylic acids and derivatives	1.38108	0.00397187	1.39525	0.480527	insig
MEDN813	Xylose	Carbohydrate metabolomics	1.07619	0.00868123	1.26779	0.342317	insig
MEDN816	4-Hydroxyhippurate	Benzene and substituted derivatives	0.820056	0.136711	1.41225	0.497992	insig
MEDN818	N-acetyl-beta-alanine	Amino Acid metabolomics	0.500279	0.113617	1.07304	0.101706	insig
MEDN821	Scyllo inositol	Alcohol	1.202	0.0050794	1.36906	0.453185	insig
MEDN824	7-ketodeoxycholic acid	Lipids	0.0479388	0.594706	1.17051	0.227134	insig
MEDN826	3-(3-Hydroxyphenyl)-3-hydroxypropanoic acid	Organic Acid And Its Derivatives	0.51972	0.0693809	1.74351	0.801998	insig
MEDN827	N-acetylornithine	Organic Acid And Its Derivatives	0.770789	0.0781731	0.853764	-0.22809	insig
MEDN828	Nonadecylic acid	Lipids_Fatty Acids	2.11945	4.9997e-09	1.23488	0.304367	insig
MEDN843	N-Amidino-L-Aspartate	Amino Acid metabolomics	0.62329	0.126767	0.882969	-0.179566	insig
MEDN846	Lumichrome	Others	0.201952	0.248142	1.11049	0.151195	insig
MEDN854	Mono-Methyl Glutarate	Organic Acid And Its Derivatives	1.61604	6.46719e-05	0.905131	-0.143801	insig
MEDN860	3,3',5'-Triiodothyronine	Organic Acid And Its Derivatives	1.17225	0.00106114	1.16119	0.215598	insig
MEDN861	1-Hydroxy-2-Naphthoate	Organic Acid And Its Derivatives	1.28551	0.316438	3.80655	1.92849	insig
MEDN862	Phenylpyruvate	Benzene and substituted derivatives	0.563147	0.171432	1.1296	0.175811	insig
MEDP002	D-Homocysteine	Amino Acid metabolomics	0.751383	0.0194435	1.12353	0.16804	insig
MEDP006	Glycine	Amino Acid metabolomics	0.140119	0.794254	1.01817	0.025974	insig
MEDP007	L-Cystine	Amino Acid metabolomics	1.41539	8.97369e-05	0.690062	-0.535202	insig
MEDP009	L-Tyrosine	Amino Acid metabolomics	0.414514	0.352732	1.03107	0.0441365	insig
MEDP011	L-Lysine	Amino Acid metabolomics	0.0322638	0.944868	1.00292	0.00421362	insig
MEDP012	L-Ornithine	Amino Acid metabolomics	1.5631	0.000687846	1.28979	0.367138	insig
MEDP013	L-Alanine	Amino Acid metabolomics	0.768156	0.0140034	1.12696	0.172431	insig
MEDP014	L-Aspartic Acid	Amino Acid metabolomics	0.53377	0.184516	1.07383	0.102769	insig
MEDP017	L-Histidine	Amino Acid metabolomics	0.311748	0.336082	1.03229	0.0458504	insig
MEDP019	L-Leucine	Amino Acid metabolomics	0.646293	0.110504	0.963365	-0.0538457	insig
MEDP020	L-Methionine	Amino Acid metabolomics	0.427112	0.433507	0.962457	-0.0552063	insig
MEDP021	L-Phenylalanine	Amino Acid metabolomics	0.433521	0.122837	0.990826	-0.0132959	insig
MEDP022	L-Proline	Amino Acid metabolomics	1.39149	0.00021763	1.19534	0.257425	insig
MEDP025	L-Tryptophan	Amino Acid metabolomics	0.707125	0.0935026	1.03608	0.0511297	insig
MEDP026	L-Valine	Amino Acid metabolomics	0.195336	0.738148	1.00949	0.0136295	insig
MEDP028	(5-L-Glutamyl)-L-Amino Acid	Amino Acid metabolomics	0.840893	0.0234186	1.14488	0.195195	insig
MEDP031	3-Chloro-L-Tyrosine	Amino Acid metabolomics	1.50093	2.94719e-05	0.88247	-0.18038	insig
MEDP032	3-Hydroxy-3-Methylpentane-1,5-Dioic Acid	Amino Acid metabolomics	2.27046	1.37047e-10	1.15832	0.21203	insig
MEDP034	3-N-Methyl-L-Histidine	Amino Acid metabolomics	0.227332	0.156786	1.44824	0.5343	insig
MEDP036	5-Oxoproline	Amino Acid metabolomics	0.215858	0.2789	1.04872	0.0686283	insig
MEDP039	Betaine	Alkaloid	0.247605	0.473296	1.0251	0.0357638	insig
MEDP044	Glutathione Reducedform	Amino Acid metabolomics	0.351253	0.362639	1.10513	0.144217	insig
MEDP058	L-Saccharopine	Amino Acid metabolomics	0.992384	0.00524975	0.868983	-0.202601	insig
MEDP059	L-Theanine	Amino Acid metabolomics	0.977292	0.0779109	0.870157	-0.200652	insig
MEDP061	N,N-Dimethylglycine	Amino Acid metabolomics	0.840512	0.0283344	1.08718	0.12059	insig
MEDP062	N6-Acetyl-L-Lysine	Amino Acid metabolomics	0.355752	0.263697	1.05297	0.0744659	insig
MEDP066	N-Acetyl-L-Tyrosine	Amino Acid metabolomics	0.341101	0.321248	1.0805	0.111696	insig
MEDP067	N-Acetylmannosamine	Amino Acid metabolomics	0.190582	0.315342	1.08158	0.113137	insig
MEDP068	N-Acetylneuraminic Acid	Amino Acid metabolomics	0.982595	0.000227444	0.345867	-1.53171	insig
MEDP069	N-Acetylputrescine	Organic Acid And Its Derivatives	2.04031	6.01674e-08	0.930292	-0.104244	insig
MEDP071	N-Glycyl-L-Leucine	Amino Acid metabolomics	0.361825	0.00154956	1.47487	0.560589	insig
MEDP075	Nα-Acetyl-L-Arginine	Amino Acid metabolomics	3.10339	6.37205e-22	1.22949	0.298064	insig
MEDP077	Phenylacetyl-L-Glutamine	Amino Acid metabolomics	0.593295	0.603457	1.09774	0.134538	insig
MEDP078	Phe-Phe	Amino Acid metabolomics	0.307827	0.284516	3.50415	1.80906	insig
MEDP079	S-(5-Adenosy)-L-Homocysteine	Amino Acid metabolomics	1.60062	5.33585e-05	1.26687	0.341274	insig
MEDP082	S-Sulfo-L-Cysteine	Amino Acid metabolomics	0.684523	0.00482159	0.769592	-0.377835	insig
MEDP084	Trimethylamine N-Oxide	Amino Acid metabolomics	1.025	0.0213252	2.10129	1.07128	up
MEDP086	Urea	Amino Acid metabolomics	1.16259	0.00325396	1.11156	0.152587	insig
MEDP087	L-Alanyl-L-Lysine	Amino Acid metabolomics	2.75396	4.26285e-13	2.28447	1.19186	up
MEDP089	N-Acetylhistamine	Organic Acid And Its Derivatives	0.271677	0.510622	1.06535	0.0913291	insig
MEDP101	P-Coumaric Acid	Benzene and substituted derivatives	0.450913	0.351801	1.04692	0.0661472	insig
MEDP102	Syringic Acid	Benzene and substituted derivatives	0.14988	0.869425	1.02012	0.0287379	insig
MEDP111	3-(4-Hydroxyphenyl)-Propionic Acid	Benzene and substituted derivatives	0.340368	0.857449	0.972452	-0.0403009	insig
MEDP112	4-Ethylbenzoic Acid	Benzene and substituted derivatives	0.846577	0.033034	1.04157	0.0587593	insig
MEDP114	Phthalic Acid	Benzene and substituted derivatives	1.91587	6.22838e-07	1.05024	0.0707194	insig
MEDP115	1,4-Dihydro-1-Methyl-4-Oxo-3-Pyridinecarboxamide	Pyridine And Pyridine Derivatives	0.294234	0.434833	1.07786	0.108172	insig
MEDP118	4-Pyridoxic Acid	Pyridine And Pyridine Derivatives	0.814049	0.222055	1.81243	0.857928	insig
MEDP120	Theobromine	Nucleotide metabolomics	0.957578	0.0994585	1.8355	0.876176	insig
MEDP123	Acetylcholine Chloride	Cholines	0.389906	0.261425	0.939058	-0.0907141	insig
MEDP125	Choline	Cholines	0.870417	0.0153456	1.09068	0.12523	insig
MEDP127	Putrescine	Polyamine	2.72601	1.84647e-14	0.874573	-0.193348	insig
MEDP128	Diethanolamine	Polyamine	0.65143	0.123221	1.07872	0.109319	insig
MEDP129	Phenethylamine	Polyamine	1.75394	1.19305e-05	1.03889	0.0550431	insig
MEDP130	4-Nitrophenol	Phenols And Its Derivatives	0.165456	0.00989748	0.945211	-0.0812924	insig
MEDP134	Inositol	Carbohydrate metabolomics	0.145384	0.0401684	0.954256	-0.0675522	insig
MEDP135	Myoinositol	Carbohydrate metabolomics	0.148887	0.03249	0.952997	-0.0694564	insig
MEDP140	Vanillin	Phenols And Its Derivatives	0.411884	0.301394	1.1074	0.147179	insig
MEDP145	1,7-Dimethylxanthine	Nucleotide metabolomics	0.835008	0.00241177	3.01777	1.59348	insig
MEDP147	1-Methylhistidine	Amino Acid metabolomics	0.518717	0.0518803	1.13481	0.182448	insig
MEDP150	2'-Deoxyinosine	Nucleotide metabolomics	0.135848	0.773971	1.04281	0.0604778	insig
MEDP152	3'-Aenylic Acid	Nucleotide metabolomics	0.194073	0.260341	1.27641	0.352094	insig
MEDP153	3-Methylxanthine	Nucleotide metabolomics	0.900338	0.00552465	2.75805	1.46365	insig
MEDP154	5,6-Dihydro-5-Methyluracil	Nucleotide metabolomics	0.0901469	0.804154	1.01151	0.0165057	insig
MEDP156	5-Methyluridine	Nucleotide metabolomics	0.5833	0.0382289	1.07469	0.103926	insig
MEDP157	7-Methylxanthine	Nucleotide metabolomics	0.376567	0.0788643	1.09063	0.125164	insig
MEDP158	8-Hydroxyguanosine	Nucleotide metabolomics	0.0823821	0.434354	1.23149	0.300409	insig
MEDP159	Adenine	Nucleotide metabolomics	0.412183	0.390355	1.04174	0.0589976	insig
MEDP160	Adenosine	Nucleotide metabolomics	2.89103	1.08242e-11	0.558364	-0.840721	insig
MEDP164	Cytidine-5-Monophosphate	Nucleotide metabolomics	0.633862	0.23534	0.925003	-0.112471	insig
MEDP171	Inosine	Nucleotide metabolomics	0.93805	0.156248	4.06207	2.02221	insig
MEDP174	Purine	Nucleotide metabolomics	0.832465	0.0375347	1.04075	0.0576249	insig
MEDP177	Thymine	Nucleotide metabolomics	0.227977	0.319229	1.0341	0.0483714	insig
MEDP178	Uracil	Nucleotide metabolomics	0.680971	0.0344907	1.12269	0.166963	insig
MEDP184	3,3',5-Triiodo-L-Thyronine	Hormones	1.64184	1.6043e-06	1.19113	0.252331	insig
MEDP186	L-Thyroxine	Hormones	1.07124	0.000786019	1.13692	0.185125	insig
MEDP188	Norepinephrine	Hormones	0.370304	0.115015	1.06248	0.0874346	insig
MEDP205	L-Carnitine	Camitine	0.404449	0.445084	0.965632	-0.0504543	insig
MEDP211	Melatonin	Tryptamines And Its Derivatives	0.168892	0.734985	1.03035	0.043141	insig
MEDP224	D-Fructose	Carbohydrate metabolomics	0.721759	1.01225e-05	0.916439	-0.125889	insig
MEDP227	D-Mannose	Carbohydrate metabolomics	0.704771	1.53385e-05	0.924263	-0.113625	insig
MEDP229	Lactose	Carbohydrate metabolomics	1.78324	2.81489e-06	0.637282	-0.649995	insig
MEDP230	Maltose	Carbohydrate metabolomics	0.132068	0.609917	0.981246	-0.0273135	insig
MEDP232	N-Acetyl-D-Glucosamine	Carbohydrate metabolomics	0.465629	0.240615	0.926732	-0.109776	insig
MEDP233	Raffinose	Carbohydrate metabolomics	0.380978	0.183594	0.854602	-0.226676	insig
MEDP236	Gluconic Acid	Carbohydrate metabolomics	1.3224	0.000978458	1.07696	0.106965	insig
MEDP239	L-Ascorbate	CoOthersEnzyme Factor & vitamin	0.0330048	0.114598	1.08556	0.118439	insig
MEDP242	Nicotinamide	CoOthersEnzyme Factor & vitamin	0.72704	0.243791	0.740173	-0.434066	insig
MEDP246	Nicotinic Acid	CoOthersEnzyme Factor & vitamin	0.482385	0.273256	1.05842	0.0819155	insig
MEDP247	Nicotinuric Acid	CoOthersEnzyme Factor & vitamin	0.66703	0.0653735	1.16464	0.219888	insig
MEDP249	Pantothenol	CoOthersEnzyme Factor & vitamin	0.0359493	0.267079	0.676581	-0.563666	insig
MEDP250	Riboflavin	CoOthersEnzyme Factor & vitamin	0.0717999	0.0860003	1.71785	0.780604	insig
MEDP251	Trigonelline	CoOthersEnzyme Factor & vitamin	0.950005	0.0456814	2.37487	1.24785	insig
MEDP270	3-Indolebutyric Acid	Indole And Its Derivatives	0.142707	0.590416	1.07084	0.0987367	insig
MEDP271	3-Indolepropionic Acid	Indole And Its Derivatives	0.111888	0.672176	0.820326	-0.285731	insig
MEDP272	5-Hydroxyindole-3-Acetic Acid	Indole And Its Derivatives	0.559035	0.153615	1.38019	0.464866	insig
MEDP274	Indole-2-Carboxylic Acid	Indole And Its Derivatives	0.819192	0.0331483	1.22852	0.296918	insig
MEDP275	Indole-3-Acetic Acid	Indole And Its Derivatives	1.21355	0.195704	0.879238	-0.185674	insig
MEDP276	Indole-3-Carboxaldehyde	Indole And Its Derivatives	0.459081	0.343057	1.12705	0.172557	insig
MEDP277	Methyl Indole-3-Acetate	Indole And Its Derivatives	0.176364	0.393997	1.19068	0.251787	insig
MEDP285	2,6-Diaminooimelic Acid	Organic Acid And Its Derivatives	0.380308	0.444847	0.940519	-0.0884717	insig
MEDP291	3,7-Dimethyluric Acid	Organic Acid And Its Derivatives	0.702375	0.0107947	4.36834	2.12708	insig
MEDP294	3-Methylcrotonyl Glycine	Organic Acid And Its Derivatives	0.176357	0.653613	0.946775	-0.0789066	insig
MEDP295	4-Acetamidobutyric Acid	Organic Acid And Its Derivatives	0.0185873	0.699596	1.02629	0.0374354	insig
MEDP296	4-Guanidinobutyric Acid	Organic Acid And Its Derivatives	0.330752	0.313477	0.946781	-0.0788968	insig
MEDP297	5-Aminovaleric Acid	Organic Acid And Its Derivatives	0.540391	0.164681	1.10691	0.146533	insig
MEDP298	6-Aminocaproic Acid	Organic Acid And Its Derivatives	0.229463	0.641133	0.975928	-0.0351538	insig
MEDP299	7-Methyluric Acid	Organic Acid And Its Derivatives	0.359866	0.60066	1.00767	0.0110164	insig
MEDP303	Chlorogenic Acid	Organic Acid And Its Derivatives	0.775826	0.364863	1.33981	0.422028	insig
MEDP305	Creatinine	Organic Acid And Its Derivatives	1.32354	0.000134155	1.18879	0.249489	insig
MEDP307	Dl-2-Aminooctanoic Acid	Organic Acid And Its Derivatives	0.498866	0.119598	1.16024	0.214422	insig
MEDP310	D-Pipecolinic Acid	Organic Acid And Its Derivatives	0.0473195	0.845326	1.00811	0.011649	insig
MEDP313	Guanidineacetic Acid	Organic Acid And Its Derivatives	1.2146	0.0178066	1.2007	0.263881	insig
MEDP315	Hippuric Acid	Organic Acid And Its Derivatives	0.622006	0.354907	1.20809	0.272727	insig
MEDP316	Homovanillic Acid	Organic Acid And Its Derivatives	0.439043	0.327123	1.04763	0.0671224	insig
MEDP317	Hydrocinnamic Acid	Organic Acid And Its Derivatives	0.460687	0.3734	1.05908	0.0828099	insig
MEDP321	L-Dihydroorotic Acid	Organic Acid And Its Derivatives	0.0451443	6.23429e-05	1.10699	0.146648	insig
MEDP322	L-Homoserine	Organic Acid And Its Derivatives	0.571877	0.199343	1.06766	0.0944492	insig
MEDP325	Maleic Acid	Organic Acid And Its Derivatives	1.35005	0.000287401	1.25094	0.323016	insig
MEDP326	N'-Formylkynurenine	Organic Acid And Its Derivatives	0.0916901	0.994761	0.998433	-0.00226279	insig
MEDP328	P-Aminohippuric Acid	Organic Acid And Its Derivatives	0.479626	0.371842	1.06835	0.0953875	insig
MEDP330	Sebacate	Organic Acid And Its Derivatives	0.864666	0.00370466	1.34258	0.425004	insig
MEDP332	Cinnamic Acid	Organic Acid And Its Derivatives	0.133732	0.484788	1.02914	0.0414349	insig
MEDP333	Uric Acid	Organic Acid And Its Derivatives	0.778067	0.0102691	1.1189	0.162077	insig
MEDP336	Lysopc 14:0	LipidsOthersPhospholipid	1.58377	0.00011311	1.35881	0.442339	insig
MEDP338	Lysopc 16:0	LipidsOthersPhospholipid	2.32319	2.4896e-11	1.07732	0.107442	insig
MEDP340	Lysopc 16:1	LipidsOthersPhospholipid	1.66995	6.7933e-06	1.44149	0.527564	insig
MEDP342	Lysopc 18:0	LipidsOthersPhospholipid	2.05169	1.17718e-08	1.19256	0.254059	insig
MEDP344	Lysopc 18:1	LipidsOthersPhospholipid	1.72377	5.33754e-06	1.17399	0.231415	insig
MEDP346	Lysopc 18:2	LipidsOthersPhospholipid	1.29986	0.00150835	1.07006	0.097692	insig
MEDP350	Lysopc 20:1	LipidsOthersPhospholipid	1.86211	2.9722e-06	1.40529	0.490866	insig
MEDP352	Lysopc 20:2	LipidsOthersPhospholipid	1.85618	4.20658e-06	1.3852	0.470097	insig
MEDP361	4-Hydroxybenzaldehyde	Benzene and substituted derivatives	0.58655	0.210982	1.06234	0.0872392	insig
MEDP365	Cotinine N-Oxide	Benzene and substituted derivatives	0.738517	0.410374	1.1001	0.137639	insig
MEDP368	Taurocholic Acid Sodium Salt Hydrate	Organic Acid And Its Derivatives	0.706178	0.101288	1.01798	0.0257042	insig
MEDP370	2-(Formylamino)Benzoic Acid	Benzene and substituted derivatives	0.394637	0.227529	1.04259	0.0601701	insig
MEDP371	Acetaminophen Glucuronide	Carbohydrate metabolomics	1.20819	0.000189161	1.34514	0.427753	insig
MEDP372	Uridine 5-Monophosphate	Nucleotide metabolomics	1.50077	0.000121948	0.744615	-0.425434	insig
MEDP373	N-Acetylglycine	Amino Acid metabolomics	0.435466	0.234515	1.04019	0.0568409	insig
MEDP374	Cyclic Amp	Nucleotide metabolomics	1.86377	5.07939e-07	1.28771	0.36481	insig
MEDP378	N6-Succinyl Adenosine	Nucleotide metabolomics	0.92457	0.0062302	1.1385	0.18714	insig
MEDP380	2-(Dimethylamino)Guanosine	Nucleotide metabolomics	1.07082	0.000579442	1.18118	0.240225	insig
MEDP381	7-Methylguanine	Nucleotide metabolomics	0.184937	0.553475	1.01576	0.0225593	insig
MEDP384	Isoxanthopterin	Pteridines and derivatives	1.07633	0.00840893	1.25229	0.32457	insig
MEDP386	N-Acetylthreonine	Amino Acid metabolomics	0.253577	0.96957	0.997451	-0.0036824	insig
MEDP387	H-Homoarg-Oh	Amino Acid metabolomics	0.188884	0.981599	0.998108	-0.00273156	insig
MEDP389	Pantetheine	CoOthersEnzyme Factor & vitamin	1.28946	0.00141089	0.946871	-0.0787607	insig
MEDP391	Menaquinone	CoOthersEnzyme Factor & vitamin	0.569408	0.00440165	0.86295	-0.212652	insig
MEDP394	4-Hydroxyretinoic Acid	CoOthersEnzyme Factor & vitamin	0.858172	0.863373	1.01608	0.0230199	insig
MEDP395	L-Pipecolic Acid	Amino Acid metabolomics	0.658538	0.277729	1.14657	0.197326	insig
MEDP401	5'-Deoxy-5'-(Methylthio) Adenosine	Nucleotide metabolomics	1.34697	0.000146289	0.74438	-0.425888	insig
MEDP404	Sarcosine	Amino Acid metabolomics	2.85594	7.77512e-17	0.877092	-0.189199	insig
MEDP405	3-Aminoisobutanoic Acid	Amino Acid metabolomics	0.533258	0.0918036	1.07828	0.108732	insig
MEDP408	11-Cis-Retinol	CoOthersEnzyme Factor & vitamin	1.72634	1.49529e-06	1.23514	0.304674	insig
MEDP410	Trans-Citridic Acid	Organic Acid And Its Derivatives	0.514804	9.95775e-08	0.77419	-0.36924	insig
MEDP416	6-Phosphogluconic Acid Trisodium Salt	Carbohydrate metabolomics	0.568718	0.0856851	1.09356	0.129033	insig
MEDP428	Cholesterol	Lipids	2.51526	8.83606e-11	1.33527	0.417135	insig
MEDP429	Punicic Acid	Lipids_Fatty Acids	1.31584	0.0004022	1.06756	0.0943145	insig
MEDP430	2-Aminoadipic Acid	Organic Acid And Its Derivatives	0.0310223	0.858385	0.985215	-0.0214899	insig
MEDP431	Hordenine	Benzene and substituted derivatives	0.207222	0.41007	1.03489	0.049481	insig
MEDP434	Lysopc 17:0	LipidsOthersPhospholipid	2.15905	1.97652e-07	1.45436	0.54038	insig
MEDP435	6-Methylmercaptopurine	Nucleotide metabolomics	1.51275	0.000142533	1.02858	0.040653	insig
MEDP437	Ergothioneine	Organic Acid And Its Derivatives	1.38448	0.000222296	1.61272	0.689493	insig
MEDP440	Methoxyindoleacetic Acid	Indole And Its Derivatives	0.593551	0.148608	1.05836	0.0818319	insig
MEDP442	Sn-Glycero-3-Phosphocholine	Cholines	0.83739	0.00800112	1.29778	0.376048	insig
MEDP443	10-Formyl-Thf	Pteridines and derivatives	0.76558	0.105991	0.859291	-0.218782	insig
MEDP450	P-Aminobenzoate	Benzene and substituted derivatives	0.585972	0.0914937	1.16224	0.216909	insig
MEDP453	Indole	Indole And Its Derivatives	0.886155	0.0286388	1.07415	0.103192	insig
MEDP454	Isoquinoline	Benzene and substituted derivatives	0.876308	0.0615366	1.23076	0.299552	insig
MEDP456	Piperidine	Benzene and substituted derivatives	0.268372	0.565603	0.968314	-0.0464525	insig
MEDP457	5-Aminolevulinate	Organic Acid And Its Derivatives	0.0687523	0.974306	0.998291	-0.00246822	insig
MEDP494	Lysopc 15:0	LipidsOthersPhospholipid	1.80649	1.67635e-05	1.3705	0.454706	insig
MEDP498	Lysopc 18:3	LipidsOthersPhospholipid	2.29635	1.2271e-10	1.14637	0.197069	insig
MEDP507	2-Hydroxycinnamic acid	Benzene and substituted derivatives	0.391142	0.390513	1.03971	0.0561862	insig
MEDP509	trans-3-Indoleacrylic acid	Organic Acid And Its Derivatives	0.761269	0.073676	1.07257	0.101066	insig
MEDP510	Acetyl-L-carnitine	Camitine	1.26402	0.000172397	1.12737	0.172962	insig
MEDP513	Hexadecanamide	Lipids_Fatty Acids	0.609734	0.3275	1.18022	0.239055	insig
MEDP514	Thiamine	CoOthersEnzyme Factor & vitamin	0.205145	0.173975	4.38985	2.13417	insig
MEDP517	Palmitoylcarnitine	Camitine	0.41682	0.279676	1.2402	0.310573	insig
MEDP518	DL-Stachydrine	Organic Acid And Its Derivatives	2.52114	3.9226e-14	1.2708	0.345738	insig
MEDP519	L-Norleucine	Amino Acid metabolomics	0.759889	0.06392	1.0701	0.0977499	insig
MEDP523	DL-Carnitine	Camitine	1.18206	0.00164031	0.846535	-0.240358	insig
MEDP525	N-Acetyl-L-alanine	Organic Acid And Its Derivatives	0.541247	0.19558	0.878338	-0.187152	insig
MEDP529	Indole-3-acetamide	Indole And Its Derivatives	0.674753	0.0495012	1.12391	0.168525	insig
MEDP535	Triethyl phosphate	Organic Acid And Its Derivatives	1.56497	0.000134454	0.80129	-0.319603	insig
MEDP537	PAF C-16	Lipids	2.06005	9.26484e-09	1.17771	0.235987	insig
MEDP540	7,8-dihydro-L-Biopterin	Pteridines and derivatives	0.357538	0.357295	1.06281	0.0878871	insig
MEDP541	δ-Valerolactam	Pyridine And Pyridine Derivatives	0.129476	0.711706	0.94391	-0.0832791	insig
MEDP545	2-Pyrrolidinone	Benzene and substituted derivatives	0.0582359	0.716292	1.02588	0.0368606	insig
MEDP546	Oxindole	Indole And Its Derivatives	0.646696	0.18984	1.21299	0.278572	insig
MEDP561	Farnesene	Lipids_Fatty Acids	0.533397	0.170086	1.03442	0.0488279	insig
MEDP574	Oleamide	Lipids_Fatty Acids	0.410064	0.629561	1.08627	0.119386	insig
MEDP575	5-amino-1-[3,4-dihydroxy-5-(hydroxymethyl)oxolan-2-yl]imidazole-4-carboxamide	Nucleotide metabolomics	1.14283	0.0150629	0.665801	-0.586837	insig
MEDP576	N1-Acetylspermine	Organic Acid And Its Derivatives	0.702114	0.0547944	1.36447	0.448337	insig
MEDP577	Isobutyryl carnitine	Camitine	0.237566	0.907424	1.00878	0.0126077	insig
MEDP578	alpha-Cadinene	Lipids_Fatty Acids	0.0365446	0.911192	1.00301	0.00433637	insig
MEDP579	gamma-Muurolene	Lipids_Fatty Acids	0.862413	0.0347224	1.08332	0.115457	insig
MEDP581	10E,12Z-Octadecadienoic acid	Lipids_Fatty Acids	0.140212	0.992746	1.00151	0.00217311	insig
MEDP583	Asp-Phe methyl ester	Organic Acid And Its Derivatives	1.10277	0.00175764	1.20164	0.265001	insig
MEDP584	Pterine	Pteridines and derivatives	0.426013	0.19173	1.0696	0.0970717	insig
MEDP585	Stearidonic Acid	Lipids_Fatty Acids	0.227643	0.602886	1.05247	0.0737794	insig
MEDP586	N-Acetylphenylalanine	Organic Acid And Its Derivatives	0.225764	0.359497	1.06154	0.086156	insig
MEDP587	N-Alpha-acetyllysine	Organic Acid And Its Derivatives	0.993888	0.00616482	0.745829	-0.423083	insig
MEDP590	p-Mentha-1,3,8-triene	Lipids_Fatty Acids	0.487337	0.467847	0.914272	-0.129304	insig
MEDP594	Dihydroactinidiolide	Benzene and substituted derivatives	0.374012	0.219196	1.25883	0.332088	insig
MEDP598	2'-Hydroxy-5'-methylacetophenone	Benzene and substituted derivatives	0.825598	0.0326675	1.09436	0.130083	insig
MEDP602	1-(4-Methoxyphenyl)-2-propanone	Benzene and substituted derivatives	1.46554	5.08607e-05	1.30172	0.380416	insig
MEDP603	Cuminaldehyde	Lipids_Fatty Acids	0.263832	0.319627	1.04189	0.0592022	insig
MEDP606	2-(3,4-dimethoxyphenyl)ethanamine	Benzene and substituted derivatives	0.527727	0.225883	1.05392	0.07577	insig
MEDP611	N-Acetyl-L-Histidine	Organic Acid And Its Derivatives	0.434812	0.126357	1.12946	0.175633	insig
MEDP612	(S)-2,3-epoxysqualene	Terpenoid	0.77487	0.102197	1.43922	0.525285	insig
MEDP617	2-Furoylglycine	Amino Acid metabolomics	0.352986	0.0515079	1.43632	0.52238	insig
MEDP618	2-Methylbutyroylcarnitine	Lipids_Fatty Acids	0.363161	0.477372	1.05907	0.0827994	insig
MEDP627	Isonicotinic acid	Organic Acid And Its Derivatives	0.627447	0.156876	1.04081	0.0577014	insig
MEDP631	Dimethyl fumarate	Lipids_Fatty Acids	2.37397	1.08277e-13	1.25697	0.32995	insig
MEDP632	beta-Cubebene	Lipids_Fatty Acids	0.367075	0.522456	0.981838	-0.0264434	insig
MEDP634	cis-gondoic acid	Lipids_Fatty Acids	0.892858	0.872204	0.976051	-0.0349714	insig
MEDP636	Furfural	Organic Acid And Its Derivatives	1.13057	0.000548949	1.0766	0.106481	insig
MEDP637	L-phenylalanyl-L-proline	Organic Acid And Its Derivatives	0.93661	0.00395853	1.2361	0.305801	insig
MEDP638	LysoPE(16:1(9Z)-0:0)	Lipids_Fatty Acids	0.190895	0.182885	1.14301	0.19284	insig
MEDP642	3-Hydroxy-DL-kynurenine	Amino Acid metabolomics	0.362803	0.859986	1.01478	0.0211739	insig
MEDP652	Methyl cinnamate	Benzene and substituted derivatives	0.687993	0.0523719	1.03001	0.0426576	insig
MEDP653	Benzylcinnamate	Benzene and substituted derivatives	1.41221	3.7377e-05	1.1223	0.166452	insig
MEDP654	2-Phenylacetamide	Benzene and substituted derivatives	0.694697	0.837673	1.04631	0.0653093	insig
MEDP656	Isoamyl butyrate	Fatty acyls	0.052148	4.6051e-05	1.1125	0.153799	insig
MEDP658	Ethyl dodecanoate	Fatty acyls	0.566885	0.181512	0.966776	-0.0487463	insig
MEDP659	Propylpropionate	Fatty acyls	0.209759	0.220002	0.929033	-0.106198	insig
MEDP660	1,4-Xylene	Benzene and substituted derivatives	0.684468	0.103703	0.968243	-0.0465587	insig
MEDP668	m-Cresol	Phenols And Its Derivatives	0.962919	0.0263381	0.938799	-0.0911123	insig
MEDP670	2,6-Dimethylpyridine	Pyridine And Pyridine Derivatives	0.0490534	0.990928	1.00063	0.000911716	insig
MEDP672	Cyclohexylamine	Amines	0.253108	0.806985	0.964312	-0.0524281	insig
MEDP676	Butyl 3-methylbutanoate	Fatty acyls	0.0492389	0.000218417	1.10433	0.143177	insig
MEDP677	Butylamine	Amines	0.851559	0.0264282	0.882975	-0.179555	insig
MEDP681	2,2,2-Trichloroethanol	Alcohol	0.160641	0.175644	0.964053	-0.052816	insig
MEDP682	Hydroxyacetone	Ketones	0.194373	0.500754	0.959039	-0.0603385	insig
MEDP685	Methylcysteine	Amino Acid metabolomics	0.377113	0.447432	1.03684	0.0521871	insig
MEDP686	2-Acetylfuran	Heterocyclic compound	0.680016	0.0251459	1.06433	0.089941	insig
MEDP688	Benzophenone	Benzene and substituted derivatives	1.10148	0.00555054	1.04694	0.0661777	insig
MEDP689	TranexamicAcid	Organic Acid And Its Derivatives	1.44072	1.8765e-07	0.852009	-0.23106	insig
MEDP695	Methyl tetradecanoate	Fatty acyls	1.15112	0.0018868	0.950819	-0.0727567	insig
MEDP697	2,6-Di-tert-butyl-4-methylphenol	Benzene and substituted derivatives	1.06745	0.0278554	1.61609	0.692506	insig
MEDP701	(E)-2-Octen-1-ol	Alcohol	0.280328	0.231033	1.17589	0.233749	insig
MEDP707	2-Pentadecanone	Ketones	0.88957	0.0146535	0.977027	-0.0335293	insig
MEDP709	Methyl dihydrojasmonate	Organic Acid And Its Derivatives	0.471383	0.152146	0.987905	-0.0175557	insig
MEDP710	Hexyl butyrate	Fatty acyls	1.04177	0.0152637	0.928763	-0.106618	insig
MEDP716	cis-Citral	Aldehyde	0.953956	0.0145828	1.08982	0.124086	insig
MEDP718	Methylisobutyrate	Organic Acid And Its Derivatives	2.37911	3.04963e-12	1.25692	0.329897	insig
MEDP719	N-Nitrosodiethylamine	Polyamine	1.83391	1.53209e-07	1.20704	0.271478	insig
MEDP724	3,5-Dinitrosalicylic acid	Organic Acid And Its Derivatives	0.07531	0.447976	0.985927	-0.0204478	insig
MEDP729	Barbituric acid	Heterocyclic compound	0.186279	0.347999	1.13721	0.185502	insig
MEDP733	o-Xylene	Benzene and substituted derivatives	0.516315	0.159302	0.971964	-0.0410254	insig
MEDP736	1,3-diisopropylbenzene	Benzene and substituted derivatives	0.511434	0.131374	1.01967	0.0280993	insig
MEDP738	carene	Heterocyclic compound	1.36077	0.000597386	1.04388	0.0619582	insig
MEDP739	Hexyl??Acetate	Fatty acyls	1.7627	1.23476e-06	1.26468	0.338776	insig
MEDP740	Farnesol	Alcohol	0.46424	0.327796	0.934647	-0.0975059	insig
MEDP742	Terpinolene	Terpenoid	0.301401	0.26938	1.01404	0.0201134	insig
MEDP746	gamma-Terpinene	Terpenoid	0.526053	0.269226	0.839337	-0.252679	insig
MEDP747	alpha-Terpinene	Terpenoid	1.7443	2.39185e-06	1.03705	0.0524912	insig
MEDP752	DL-Leucine	Amino Acid metabolomics	0.593268	0.145321	0.967872	-0.0471118	insig
MEDP759	Glycyrrhetinic acid	Terpenoid	0.0537959	0.677376	1.51883	0.60296	insig
MEDP760	9-Fluorenone	Ketones	0.481347	0.121838	1.06035	0.084539	insig
MEDP765	3-(Methylthio)-1-propanol	Alcohol	0.732339	0.0475678	0.962279	-0.0554731	insig
MEDP767	Aspirin	Organic Acid And Its Derivatives	0.192097	2.68227e-05	0.917307	-0.124523	insig
MEDP778	Ethyl butyrate	Fatty acyls	0.201129	0.15141	0.912322	-0.132385	insig
MEDP781	2-Undecanone	Ketones	1.47697	0.000134449	1.31055	0.390167	insig
MEDP783	10-UNDECENOIC ACID	Fatty acyls	1.83697	5.24293e-09	1.14253	0.192227	insig
MEDP784	Undecanal	Aldehyde	1.47222	0.000126582	1.29624	0.374332	insig
MEDP789	2-Pentyl-3-phenyl-2-propenal	Aldehyde	0.511872	0.312535	0.990709	-0.0134674	insig
MEDP791	4-aminophenol	Phenols And Its Derivatives	0.542683	0.321249	1.06017	0.0842926	insig
MEDP792	PYRROLIDINE	Heterocyclic compound	0.27592	0.566795	1.02534	0.0361003	insig
MEDP794	Octanal	Aldehyde	0.355936	0.192397	1.20224	0.265725	insig
MEDP796	Pyrene	Benzene and substituted derivatives	0.296662	0.72129	0.997266	-0.00394916	insig
MEDP799	(-)-Menthone	Ketones	0.670853	0.181848	0.980517	-0.0283856	insig
MEDP811	2-(Methylthio)benzothiazole	Benzene and substituted derivatives	0.100804	0.832991	1.00783	0.0112477	insig
MEDP812	5-METHYLFURFURAL	Aldehyde	0.00832865	0.0784636	1.04699	0.0662479	insig
MEDP814	METHYL VALERATE	Fatty acyls	0.144498	0.884605	0.990355	-0.0139821	insig
MEDP815	N-ETHYLACETAMIDE	Amines	0.821819	0.00188977	0.864353	-0.210307	insig
MEDP817	PROPYL HEXANOATE	Fatty acyls	0.174666	1.30617e-08	1.19144	0.252706	insig
MEDP818	1-PENTADECANOL	Alcohol	0.546038	0.138405	1.03491	0.0495037	insig
MEDP828	2-Methyl-1-propanol	Alcohol	0.393907	0.752291	0.978004	-0.0320882	insig
MEDP831	1-Aminopropan-2-ol	Alcohol	0.793731	0.0292895	1.93896	0.955284	insig
MEDP836	Dibutyl phthalate	Benzene and substituted derivatives	0.768372	0.0616303	0.969906	-0.0440837	insig
MEDP839	Pulegone	Ketones	1.18776	0.00333644	1.10624	0.145658	insig
MEDP843	ETHYL ISOBUTYRATE	Fatty acyls	0.364929	0.00831128	0.839836	-0.25182	insig
MEDP844	FURFURYL ALCOHOL	Alcohol	0.131346	0.0904166	0.964791	-0.0517113	insig
MEDP845	1-Phenylethanol	Benzene and substituted derivatives	0.758599	0.00158868	0.947055	-0.0784798	insig
MEDP853	Choline chloride	Others	0.77245	0.0235428	1.1008	0.138559	insig
MEDP855	caprate (10:0)	Lipids	0.221774	0.25371	1.02682	0.0381879	insig
MEDP856	Isobutyl decanoate	Fatty acyls	0.0689595	0.67105	1.00868	0.0124707	insig
MEDP859	glycylphenylalanine	Amino Acid metabolomics	0.402909	0.800401	0.965341	-0.0508892	insig
MEDP860	L-Glutamic acid	Amino Acid metabolomics	0.545741	0.255153	0.921024	-0.118689	insig
MEDP863	proline betaine	Organic Acid And Its Derivatives	0.00525141	0.949204	1.00221	0.00317969	insig
MEDP865	Bisphenol propane	Benzene and substituted derivatives	0.537986	0.134324	1.04618	0.0651354	insig
MEDP867	Vitamin E	CoOthersEnzyme Factor & vitamin	0.472756	0.250862	1.04129	0.0583688	insig
MEDP868	N-methylalanine	Amino Acid metabolomics	0.224224	0.475152	1.02808	0.0399584	insig
MEDP871	sphinganine	Lipids	2.24827	2.84387e-07	0.740952	-0.432547	insig
MEDP872	Glycerophosphatidylcholine	Lipids	0.291632	0.685981	1.04159	0.0587825	insig
MEDP873	3'-UMP	Nucleotide metabolomics	1.93988	3.10661e-08	1.32751	0.408722	insig
MEDP874	tryptophan betaine	Organic Acid And Its Derivatives	0.0563689	0.881282	0.977659	-0.0325961	insig
MEDP876	O-Succinyl-L-Homoserine	Amino Acid metabolomics	1.01957	0.0587773	1.15735	0.210822	insig
MEDP877	Cytidine 5'-Diphosphocholine	Nucleotide metabolomics	0.48619	0.00142363	0.830794	-0.267437	insig
MEDP878	N-Methyl-L-Glutamate	Amino Acid metabolomics	0.171475	0.905841	1.00992	0.0142436	insig
MEDP879	N-Methyl-D-Aspartic Acid	Amino Acid metabolomics	0.755776	0.0746022	1.20551	0.269647	insig
MEDP881	Phosphocholine	Nucleotide metabolomics	2.77423	3.66394e-17	1.35745	0.440897	insig
MEDP883	2,4-Dihydroxypteridine	Pteridines and derivatives	0.159894	0.777162	1.01377	0.0197303	insig
MEDP884	L-Methionine Sulfoximine	Organic Acid And Its Derivatives	0.498626	0.305945	0.92972	-0.105132	insig
MEDP888	2'-Deoxycytidine 5'-Diphosphate	Nucleotide metabolomics	0.279977	0.797893	1.02304	0.0328609	insig
MEDP889	Cortisol	Lipids	1.71966	2.57634e-06	1.5086	0.593206	insig
MEDP891	L-Tryptophanamide	Amino Acid metabolomics	0.611652	0.116823	1.2474	0.318925	insig
MEDP904	Oleate	Lipids	0.41261	0.633417	1.08618	0.119257	insig

## Sheet: CNV vs PCV
The OPLS results of CNV and PCV
Index	Compounds	Class	VIP	P value	Fold_Change	Log2FC	Type
MEDN005	L-Threonine	Amino Acid metabolomics	0.0136662	0.767914	0.977582	-0.0327105	insig
MEDN007	L-Arginine	Amino Acid metabolomics	0.243454	0.345938	0.937548	-0.0930362	insig
MEDN010	L-Citrulline	Amino Acid metabolomics	0.294172	0.336881	0.950817	-0.0727598	insig
MEDN011	L-Glutamic Acid	Amino Acid metabolomics	0.347352	0.24297	0.860207	-0.217244	insig
MEDN013	L-Isoleucine	Amino Acid metabolomics	0.530141	0.199739	0.920176	-0.120019	insig
MEDN017	L-Pyroglutamic Acid	Amino Acid metabolomics	0.609398	0.37316	1.18565	0.245677	insig
MEDN018	L-Serine	Amino Acid metabolomics	0.888777	0.0217347	0.884838	-0.176514	insig
MEDN030	5-Hydroxy-L-Tryptophan	Amino Acid metabolomics	1.40447	0.0129521	0.683091	-0.54985	insig
MEDN033	Asp-Phe	Amino Acid metabolomics	1.59745	0.223651	0.398115	-1.32874	insig
MEDN041	Hexanoyl Glycine	Amino Acid metabolomics	1.32903	0.0273608	0.676924	-0.562934	insig
MEDN042	L-Asparagine Anhydrous	Amino Acid metabolomics	0.65181	0.113345	0.926346	-0.110377	insig
MEDN043	L-Carnosine	Amino Acid metabolomics	0.907599	0.102073	1.15347	0.205982	insig
MEDN045	L-Cysteine	Amino Acid metabolomics	0.791655	0.0320922	0.906111	-0.14224	insig
MEDN046	L-Glutamine	Amino Acid metabolomics	0.436631	0.186194	0.960752	-0.0577633	insig
MEDN047	L-Homocitrulline	Amino Acid metabolomics	1.19582	0.0351974	0.822003	-0.282784	insig
MEDN051	Methionine Sulfoxide	Amino Acid metabolomics	0.149175	0.913253	1.00826	0.0118692	insig
MEDN055	N-Acetyl-L-Glutamic Acid	Amino Acid metabolomics	0.408726	0.0231199	0.59696	-0.744293	insig
MEDN056	N-Acetyl-L-Leucine	Amino Acid metabolomics	0.888532	0.170821	0.652554	-0.615832	insig
MEDN060	N-Isovaleroylglycine	Amino Acid metabolomics	1.13705	0.00868419	0.628673	-0.669617	insig
MEDN061	N-Phenylacetylglycine	Amino Acid metabolomics	0.538431	0.587335	0.824931	-0.277655	insig
MEDN065	O-Phospho-L-Serine	Amino Acid metabolomics	0.697139	0.188566	0.751889	-0.411409	insig
MEDN072	Trans-4-Hydroxy-L-Proline	Amino Acid metabolomics	0.968304	0.0149319	0.889716	-0.168582	insig
MEDN084	Benzoic Acid	Benzene and substituted derivatives	1.3004	0.00900906	1.12738	0.172979	insig
MEDN086	Terephthalic Acid	Benzene and substituted derivatives	0.881773	0.0722047	0.967849	-0.0471466	insig
MEDN087	(3,4-Dimethoxyphenyl) Acetic Acid	Benzene and substituted derivatives	1.29092	0.00470508	0.846738	-0.240012	insig
MEDN090	2-Methoxybenzoic Acid	Benzoic Acid And Its Derivatives	0.141533	0.180912	0.727582	-0.458819	insig
MEDN092	3,4-Dihydroxybenzeneacetic Acid	Benzene and substituted derivatives	0.327576	0.814005	1.01058	0.0151885	insig
MEDN093	3-Hydroxyanthranilic Acid	Benzoic Acid And Its Derivatives	1.01946	0.445123	0.900704	-0.150875	insig
MEDN097	P–Hydroxyphenyl Acetic Acid	Benzene and substituted derivatives	0.658638	0.461999	0.897597	-0.15586	insig
MEDN105	Taurocholic Acid	Bile Acids	1.0392	0.126499	2.03502	1.02504	insig
MEDN109	Hyodeoxycholic Acid	Bile Acids	1.39078	0.0031392	0.480469	-1.05749	down
MEDN110	Glycoursodeoxycholic Acid	Bile Acids	1.16292	0.00206606	0.538878	-0.891969	insig
MEDN112	Glycocholic Acid	Bile Acids	0.690978	0.791171	0.955088	-0.0662944	insig
MEDN113	Glycochenodeoxycholic Acid	Bile Acids	0.508546	0.131984	0.834673	-0.260716	insig
MEDN115	Chenodeoxycholic Acid	Bile Acids	1.02173	0.103226	0.608708	-0.716177	insig
MEDN124	Protocatechuic Acid	Phenols And Its Derivatives	0.294774	0.688272	0.939249	-0.0904205	insig
MEDN139	1-Methylxanthine	Nucleotide metabolomics	0.573727	0.228008	1.4729	0.558656	insig
MEDN140	2,6-Dihydroxypurine	Nucleotide metabolomics	0.445409	0.155805	0.739399	-0.435575	insig
MEDN147	5-Methylcytosine	Nucleotide metabolomics	0.797939	0.445247	1.04761	0.0670981	insig
MEDN163	Hypoxanthine	Nucleotide metabolomics	1.10911	0.06371	0.284961	-1.81116	insig
MEDN168	Thymidine	Nucleotide metabolomics	0.0234877	0.619406	0.936374	-0.0948438	insig
MEDN171	Uridine	Nucleotide metabolomics	0.246664	0.148124	0.905101	-0.143849	insig
MEDN172	Β-Nicotinamide Mononucleotide	Nucleotide metabolomics	0.852416	0.001906	0.805298	-0.312405	insig
MEDN178	Epinephrine	Hormones	1.16938	0.0200296	0.955353	-0.0658935	insig
MEDN196	Pyrroloquinoline Quinone	Organic Acid And Its Derivatives	0.680966	0.610055	0.916879	-0.125197	insig
MEDN198	Citric Acid	Amino Acid metabolomics	0.37974	0.132183	0.888007	-0.171356	insig
MEDN201	Succinic Acid	Amino Acid metabolomics	0.217298	0.417567	0.931086	-0.103014	insig
MEDN202	A-Ketoglutaric Acid	Amino Acid metabolomics	0.615252	0.321054	0.548056	-0.867604	insig
MEDN209	Tryptamine	Tryptamines And Its Derivatives	1.25281	0.0270511	0.652242	-0.616521	insig
MEDN213	D-Sorbitol	Carbohydrate metabolomics	0.0787305	0.0450475	0.791545	-0.337257	insig
MEDN220	D-Glucose	Carbohydrate metabolomics	0.936593	0.0324226	0.870883	-0.19945	insig
MEDN224	D-Trehalose	Carbohydrate metabolomics	0.284068	0.402193	0.947345	-0.0780384	insig
MEDN226	D-Erythronolactone	Carbohydrate metabolomics	1.70537	0.000100878	0.936807	-0.0941757	insig
MEDN228	D-Arabinose	Carbohydrate metabolomics	0.845205	0.0438447	0.81721	-0.291221	insig
MEDN231	L-Fucose	Carbohydrate metabolomics	0.284099	0.553874	0.904379	-0.145	insig
MEDN232	L-Rhamnose	Carbohydrate metabolomics	1.12944	0.789217	1.05207	0.0732373	insig
MEDN240	L-Gulonic-Γ-Lactone	Carbohydrate metabolomics	0.13329	0.046526	0.877102	-0.189184	insig
MEDN241	Vitamin D3	CoOthersEnzyme Factor & vitamin	2.14428	4.1209e-16	0.58258	-0.779471	insig
MEDN244	Orotic Acid	CoOthersEnzyme Factor & vitamin	0.0730465	0.154472	0.862349	-0.213656	insig
MEDN245	Pantothenate	CoOthersEnzyme Factor & vitamin	0.968013	0.0368387	0.857523	-0.221753	insig
MEDN273	1,3-Dimethyluric Acid	Organic Acid And Its Derivatives	0.019264	0.264354	1.54349	0.626201	insig
MEDN274	1,7-Dimethyluric Acid	Organic Acid And Its Derivatives	0.0590095	0.264868	1.54264	0.625404	insig
MEDN279	2-Aminoethanesulfinic Acid	Organic Acid And Its Derivatives	0.249353	0.173997	0.830571	-0.267824	insig
MEDN280	2-Aminoethanesulfonic Acid	Organic Acid And Its Derivatives	0.587232	0.155373	0.809263	-0.305319	insig
MEDN283	2-Hydroxybutanoic Acid	Organic Acid And Its Derivatives	0.666726	0.17463	0.908934	-0.137752	insig
MEDN284	2-Hydroxyisocaproic Acid	Organic Acid And Its Derivatives	0.109956	0.745392	0.956554	-0.0640812	insig
MEDN285	2-Methylsuccinic Acid	Organic Acid And Its Derivatives	0.151374	0.912458	0.988521	-0.016656	insig
MEDN286	3,4,5-Trimethoxycinnamic Acid	Organic Acid And Its Derivatives	0.429534	0.0587134	0.239529	-2.06173	insig
MEDN290	3-Hydroxy-3-Methyl Butyric Acid	Organic Acid And Its Derivatives	1.07698	0.0210559	0.87618	-0.1907	insig
MEDN292	3-Hydroxybutyrate	Organic Acid And Its Derivatives	0.176408	0.484	0.867144	-0.205657	insig
MEDN299	Adipic Acid	Organic Acid And Its Derivatives	0.997909	0.282136	0.556296	-0.846076	insig
MEDN300	Azelaic Acid	Organic Acid And Its Derivatives	1.13732	0.119033	0.898912	-0.153748	insig
MEDN301	Caffeic Acid	Organic Acid And Its Derivatives	0.8167	0.849788	0.96032	-0.0584125	insig
MEDN305	Creatine	Organic Acid And Its Derivatives	0.726609	0.110309	0.867192	-0.205577	insig
MEDN311	Dodecanedioic Aicd	Organic Acid And Its Derivatives	0.748619	0.725613	0.931873	-0.101795	insig
MEDN314	Glutaric Acid	Organic Acid And Its Derivatives	0.00985786	0.76819	0.969463	-0.0447419	insig
MEDN316	Guanidinoethyl Sulfonate	Organic Acid And Its Derivatives	0.615136	0.240393	1.02654	0.03779	insig
MEDN321	Kinic Acid	Organic Acid And Its Derivatives	0.628441	0.123116	0.883851	-0.178126	insig
MEDN322	Kinurenine	Organic Acid And Its Derivatives	0.980707	0.074287	0.913592	-0.130378	insig
MEDN323	Kynurenic Acid	Organic Acid And Its Derivatives	1.03133	0.0295987	0.819968	-0.286361	insig
MEDN324	L-3-Phenyllactic Acid	Organic Acid And Its Derivatives	0.174257	0.988562	1.0015	0.00215928	insig
MEDN325	L-Lactic Acid	Organic Acid And Its Derivatives	0.557694	0.112597	0.903623	-0.146207	insig
MEDN333	Malonicacid	Organic Acid And Its Derivatives	0.18513	0.475221	0.865327	-0.208683	insig
MEDN334	Mandelic Acid	Organic Acid And Its Derivatives	0.577252	0.521645	0.91149	-0.133701	insig
MEDN335	Methylmalonic Acid	Organic Acid And Its Derivatives	0.224508	0.428051	0.933032	-0.100002	insig
MEDN338	Phenyllactate (Pla)	Organic Acid And Its Derivatives	0.383717	0.687975	0.960492	-0.0581552	insig
MEDN339	Phenylpyruvic Acid	Organic Acid And Its Derivatives	0.70327	0.199516	0.898303	-0.154725	insig
MEDN340	Pyrrole-2-Carboxylic Acid	Organic Acid And Its Derivatives	0.470506	0.150675	1.167	0.222804	insig
MEDN343	Shikimic Acid	Organic Acid And Its Derivatives	0.357834	0.0813177	0.764822	-0.386804	insig
MEDN344	Subericacid	Organic Acid And Its Derivatives	1.13767	0.125575	0.904169	-0.145335	insig
MEDN346	Vanillic Acid	Organic Acid And Its Derivatives	0.21457	0.279547	0.802317	-0.317755	insig
MEDN351	12-Hete	Lipids	0.756174	0.670885	0.697716	-0.519288	insig
MEDN352	O-Phosphorylethanolamine	LipidsOthersPhospholipid	0.235614	0.135258	1.14444	0.194636	insig
MEDN356	Lysops 22:6	LipidsOthersPhospholipid	0.487389	0.317944	0.941824	-0.0864713	insig
MEDN360	Lysopg 18:1	LipidsOthersPhospholipid	0.220266	0.552884	0.975714	-0.0354695	insig
MEDN362	Lysope 18:1	LipidsOthersPhospholipid	0.578392	0.11815	0.878152	-0.187458	insig
MEDN364	Lysope 18:0	LipidsOthersPhospholipid	0.756801	0.185555	0.929288	-0.105802	insig
MEDN366	Lysope 16:0	LipidsOthersPhospholipid	0.79561	0.127664	0.922159	-0.116913	insig
MEDN368	Lysope 14:0	LipidsOthersPhospholipid	1.01084	0.0321258	0.77574	-0.366355	insig
MEDN370	Lysopa 18:0	LipidsOthersPhospholipid	0.7115	0.118165	0.928238	-0.107433	insig
MEDN372	Lysopa 16:0	LipidsOthersPhospholipid	0.723253	0.247397	0.946752	-0.0789413	insig
MEDN374	9-Hpode	Lipids	0.73509	0.374721	0.853946	-0.227783	insig
MEDN375	13-HOTrE [13S-hydroxy-9Z,11E,15Z-octadecatrienoic acid]	Oxidized lipid	0.567878	0.590039	1.03627	0.0513956	insig
MEDN376	9,10-DiHOME [(±)9,10-dihydroxy-12Z-octadecenoic acid]	Oxidized lipid	0.0916411	0.686457	1.04898	0.0689904	insig
MEDN378	γ-Linolenic Acid(C18:3N6)	Lipids_Fatty Acids	0.428031	0.629745	0.950655	-0.0730066	insig
MEDN380	Palmitoleic Acid (C16:1)	Lipids_Fatty Acids	0.388261	0.152376	1.21453	0.280401	insig
MEDN381	Hexadecanoic Acid (C16:0)	Lipids_Fatty Acids	0.350995	0.28252	1.03478	0.049324	insig
MEDN383	Linoleic Acid (C18:2N6C)	Lipids_Fatty Acids	1.25649	0.00154591	1.1749	0.232542	insig
MEDN385	Dodecanoic Acid(C12:0)	Lipids_Fatty Acids	0.112402	0.895316	0.972822	-0.0397524	insig
MEDN388	Elaidic Acid (C18:1N9T)	Lipids_Fatty Acids	0.275561	0.285805	1.05755	0.0807197	insig
MEDN390	EPA [5Z,8Z,11Z,14Z,17Z-eicosapentaenoic acid]	Oxidized lipid	0.242457	0.82356	0.965977	-0.0499392	insig
MEDN391	DHA [4Z,7Z,10Z,13Z,16Z,19Z-docosahexaenoic acid]	Oxidized lipid	0.35107	0.626017	1.05343	0.0750974	insig
MEDN394	Cis-11,14-Eicosadienoic Acid (C20:2)	Lipids_Fatty Acids	0.409333	0.118294	1.19074	0.251856	insig
MEDN395	Cis-11,14,17-Eicosatrienoic Acid (C20:3)	Lipids_Fatty Acids	2.17361	1.39861e-06	0.900252	-0.1516	insig
MEDN399	Arachidic Acid(C20:0)	Lipids_Fatty Acids	0.376338	0.465843	0.92022	-0.119949	insig
MEDN400	Α-Linolenic Acid(C18:3N3)	Lipids_Fatty Acids	0.345318	0.806028	0.974103	-0.0378542	insig
MEDN403	Urocanic Acid	Organic Acid And Its Derivatives	0.256261	0.406276	0.653715	-0.613265	insig
MEDN406	3-(3-Hydroxyphenyl)Propionate Acid	Organic Acid And Its Derivatives	0.00466771	0.467186	0.840343	-0.250949	insig
MEDN414	4-(Aminomethyl)-5-(Hydroxymethyl)-2-Methylpyridin-3-Ol	Others	0.478838	0.415495	1.05543	0.0778297	insig
MEDN429	3-Hydroxyhippuric Acid	Organic Acid And Its Derivatives	0.0583974	0.862648	1.04918	0.0692561	insig
MEDN430	Thiamine Triphosphate	CoOthersEnzyme Factor & vitamin	0.394639	0.542579	1.01276	0.0182926	insig
MEDN432	5-Hydroxyhexanoic Acid	Organic Acid And Its Derivatives	1.3548	0.00596414	0.614164	-0.703303	insig
MEDN434	Β-Pseudouridine	Nucleotide metabolomics	1.19542	0.0412309	0.909474	-0.136896	insig
MEDN444	Hypoxanthine-9-β-D-Arabinofuranoside	Nucleotide metabolomics	0.965275	0.11461	0.0358685	-4.80114	insig
MEDN470	Oxoadipic Acid	Organic Acid And Its Derivatives	0.905952	0.0500213	0.763298	-0.389682	insig
MEDN472	1-Methyluric Acid	Organic Acid And Its Derivatives	0.109639	0.340642	1.29533	0.373325	insig
MEDN478	Aminomalonic Acid	Organic Acid And Its Derivatives	0.134005	0.529261	0.942888	-0.0848413	insig
MEDN481	2,4-Dihydroxybenzoic Acid	Benzene and substituted derivatives	0.305866	0.465765	0.856477	-0.223513	insig
MEDN483	3-Methyl-2-Oxobutanoic Acid	Organic Acid And Its Derivatives	1.19092	0.00829667	0.871862	-0.197829	insig
MEDN486	Palmitaldehyde	Lipids_Fatty Acids	2.18978	2.92099e-05	1.24809	0.319722	insig
MEDN487	Allysine	Organic Acid And Its Derivatives	0.138133	0.0382993	0.872903	-0.196106	insig
MEDN490	Fumaric Acid	Amino Acid metabolomics	1.38443	0.00417043	0.897671	-0.155742	insig
MEDN491	9-HOTrE [9S-hydroxy-10E,12Z,15Z-octadecatrienoic acid]	Oxidized lipid	0.99829	0.0759464	1.10218	0.140355	insig
MEDN494	8,15-Dihete	Lipids_Fatty Acids	0.559664	0.0690718	1.29183	0.369421	insig
MEDN496	N-Acetylmethionine	Amino Acid metabolomics	1.87984	0.000786814	0.7008	-0.512926	insig
MEDN498	Ribulose-5-Phosphate	Carbohydrate metabolomics	0.328161	0.39502	0.961073	-0.0572819	insig
MEDN499	Argininosuccinic acid	Organic Acid And Its Derivatives	0.262149	0.20439	0.945751	-0.0804675	insig
MEDN502	2-Deoxyribose 1-Phosphate	Carbohydrate metabolomics	0.995871	0.0172045	0.896005	-0.158421	insig
MEDN506	N-Acetylglucosamine 1-Phosphate	Carbohydrate metabolomics	0.873864	0.00505566	0.827695	-0.272829	insig
MEDN523	Indolelactic acid	Indole And Its Derivatives	0.402673	0.0441254	0.846373	-0.240634	insig
MEDN524	Estrone	Hormones	1.0181	0.613588	0.928896	-0.106412	insig
MEDN528	(3-Methoxy-4-hydroxyphenyl)ethylene glycol sulfate	Organic Acid And Its Derivatives	1.16359	0.065942	0.862161	-0.21397	insig
MEDN530	Pimelic acid	Organic Acid And Its Derivatives	1.12615	0.401777	0.885866	-0.17484	insig
MEDN533	Xanthosine	Nucleotide metabolomics	1.41832	0.0115123	0.700235	-0.51409	insig
MEDN538	UDP-glucose	Nucleotide metabolomics	1.2804	0.107863	1.16744	0.223351	insig
MEDN540	1-Methylguanine	Nucleotide metabolomics	0.290983	0.983134	0.998671	-0.00191883	insig
MEDN551	Indoleacrylic acid	Organic Acid And Its Derivatives	0.561802	0.0869635	1.50001	0.584974	insig
MEDN553	2-Methylbenzoic acid	Benzene and substituted derivatives	1.19854	0.0666213	0.281157	-1.83055	insig
MEDN555	Hydroxyphenyllactic acid	Carbohydrate metabolomics	0.096553	0.673293	0.973999	-0.0380075	insig
MEDN560	MARMESIN	Carbohydrate metabolomics	0.541189	0.258111	0.804251	-0.314282	insig
MEDN562	INDOLE-3-CARBINOL	Indole And Its Derivatives	0.215093	0.775712	0.971082	-0.0423353	insig
MEDN563	DL-Benzylsuccinic acid	Lipids_Fatty Acids	0.247852	0.528733	0.898863	-0.153826	insig
MEDN568	2-Methylguanosine	Nucleotide metabolomics	0.670559	0.101245	0.906791	-0.141158	insig
MEDN569	DL-o-Tyrosine	Organic Acid And Its Derivatives	0.097353	0.984704	0.998884	-0.00161034	insig
MEDN570	L-Erythrulose	Carbohydrate metabolomics	0.485529	0.350454	0.941693	-0.0866706	insig
MEDN575	3-Hydroxypicolinic acid	Pyridine And Pyridine Derivatives	0.382336	0.371042	0.623126	-0.682404	insig
MEDN576	1,2,3-Trihydroxybenzene	Benzene and substituted derivatives	0.231661	0.64119	1.19952	0.262456	insig
MEDN579	N-lactoyl-phenylalanine	Organic Acid And Its Derivatives	0.857906	0.0539707	0.836388	-0.257756	insig
MEDN587	N-Acetylvaline	Organic Acid And Its Derivatives	0.866507	0.0167117	0.769693	-0.377645	insig
MEDN589	Cyclamic acid	Organic Acid And Its Derivatives	0.0494399	0.496149	0.689169	-0.537071	insig
MEDN593	D-(+)-Malic acid	Amino Acid metabolomics	0.309825	0.0868958	0.845996	-0.241276	insig
MEDN602	deoxyguanosine 5'-monophosphate (dGMP)	Nucleotide metabolomics	0.793994	0.848069	0.94786	-0.0772538	insig
MEDN604	Tetradecanedioic acid	Lipids_Fatty Acids	0.730921	0.982099	0.995456	-0.00656984	insig
MEDN606	5-Methoxytryptophol	Indole And Its Derivatives	1.13387	0.0382045	0.889822	-0.168411	insig
MEDN609	Uridine triphosphate (UTP)	Nucleotide metabolomics	1.30263	0.0182612	0.577626	-0.791793	insig
MEDN611	6β-hydroxytestosterone	Hormones	0.483191	0.309949	1.05036	0.0708839	insig
MEDN615	Carbamoyl phosphate	Organic Acid And Its Derivatives	0.450078	0.215122	1.11459	0.156515	insig
MEDN620	Glucotropaeolin	Carbohydrate metabolomics	1.11433	0.0355528	1.05926	0.0830549	insig
MEDN621	Indoxylsulfuric acid	Organic Acid And Its Derivatives	0.693179	0.0203106	0.737399	-0.439483	insig
MEDN622	Porphobilinogen	Organic Acid And Its Derivatives	2.26124	2.70294e-05	1.30268	0.381478	insig
MEDN623	Salicyluric acid	Benzene and substituted derivatives	0.402435	0.340029	1.20698	0.271401	insig
MEDN625	Formononetin	Carbohydrate metabolomics	0.0177569	0.994645	0.99925	-0.00108213	insig
MEDN632	N-Oleoyl Glycine	Organic Acid And Its Derivatives	3.17377	7.66636e-14	0.847466	-0.238772	insig
MEDN647	Hydroquinone	Phenols And Its Derivatives	0.492889	0.555134	1.11517	0.157258	insig
MEDN649	Anthranilic acid	Benzene and substituted derivatives	0.159524	0.00256687	0.849461	-0.23538	insig
MEDN651	Succinic anhydride	Organic Acid And Its Derivatives	1.01909	0.0413487	0.906141	-0.142192	insig
MEDN654	3-Methylsalicylic acid	Organic Acid And Its Derivatives	0.245289	0.37039	1.03293	0.0467445	insig
MEDN656	Indoleacetaldehyde	Indole And Its Derivatives	1.29656	0.0244076	0.635073	-0.655005	insig
MEDN657	D-Xylulose 5-phosphate	Carbohydrate metabolomics	0.704939	0.427313	1.05219	0.0733976	insig
MEDN658	Hexadecanedioic acid	Lipids_Fatty Acids	0.375434	0.769157	0.936927	-0.0939916	insig
MEDN659	Pyrophosphate	Organic Acid And Its Derivatives	0.373424	0.0129684	0.785823	-0.347724	insig
MEDN661	Vanillylmandelic acid	Benzene and substituted derivatives	0.897905	0.0777764	0.874814	-0.192952	insig
MEDN662	Gamma-Glu-Leu	Organic Acid And Its Derivatives	1.10842	0.0218924	0.878896	-0.186235	insig
MEDN675	Methylstearate	Fatty acyls	3.39098	5.24577e-14	1.54185	0.624659	insig
MEDN678	Ethylsalicylate	Organic Acid And Its Derivatives	1.42864	0.00440753	1.17984	0.238595	insig
MEDN679	Maltol	Heterocyclic compound	0.593772	0.983321	1.0032	0.0046138	insig
MEDN682	Octadecanamide	Fatty acyls	0.303573	0.456995	0.977076	-0.0334567	insig
MEDN694	2-nonanol	Alcohol	1.15626	0.0127405	0.938878	-0.0909897	insig
MEDN698	1-Naphthol	Phenols And Its Derivatives	0.126582	0.467175	1.02416	0.0344475	insig
MEDN704	Oxaloacetic acid	Organic Acid And Its Derivatives	0.394033	0.394647	1.05997	0.0840187	insig
MEDN706	Butyl??Acetate	Fatty acyls	0.492126	0.676805	1.1431	0.192956	insig
MEDN719	2-n-Pentylfuran	Heterocyclic compound	0.159645	0.763603	1.01361	0.0195055	insig
MEDN725	Sorbic acid	Organic Acid And Its Derivatives	0.695372	0.0475569	0.930754	-0.103528	insig
MEDN727	Methyl hexadecanoate	Fatty acyls	3.47799	3.22907e-17	0.840904	-0.249987	insig
MEDN729	Phenoxyacetic acid	Benzene and substituted derivatives	0.0430076	0.636422	0.790107	-0.339881	insig
MEDN731	4-tert-Octylphenol	Phenols And Its Derivatives	1.27961	0.00263308	1.03671	0.0520148	insig
MEDN732	RICINOLEIC ACID	Fatty acyls	0.00695983	0.432067	0.913907	-0.12988	insig
MEDN733	PHENYL-BETA-D-GLUCOPYRANOSIDE	Carbohydrate metabolomics	0.637003	0.0837614	1.05636	0.0791042	insig
MEDN734	Cis-3-Hexenylacetate	Fatty acyls	1.11803	0.0172208	0.946533	-0.079275	insig
MEDN736	2-(Methylthio)ethanol	Alcohol	1.48261	0.00333988	1.16868	0.224883	insig
MEDN741	Methanesulfonic acid	Others	0.884812	0.00234538	0.304437	-1.71578	insig
MEDN743	2-Nonanone	Ketones	1.22466	0.00890513	0.941542	-0.0869029	insig
MEDN745	Propylparaben	Benzoic Acid And Its Derivatives	0.0282119	0.384763	0.851266	-0.232319	insig
MEDN747	2,4-Di-tert-butylphenol	Phenols And Its Derivatives	1.62882	0.000206382	1.05756	0.0807395	insig
MEDN748	Methylparaben	Benzoic Acid And Its Derivatives	0.813298	0.665635	1.02982	0.0423897	insig
MEDN750	(±)12-HEPE [(±)-12-hydroxy-5Z,8Z,10E,14Z,17Z-eicosapentaenoic acid]	Oxidized lipid	0.293221	0.282236	0.512959	-0.963084	insig
MEDN751	(±)12-HETE [(±)12-hydroxy-5Z,8Z,10E,14Z-eicosatetraenoic acid]	Oxidized lipid	0.154638	0.650339	0.663616	-0.59158	insig
MEDN758	(±)4-HDHA [(±)4-hydroxy-5E,7Z,10Z,13Z,16Z,19Z-docosahexaenoic acid]	Oxidized lipid	0.123963	0.238781	0.583757	-0.776561	insig
MEDN760	(±)5-HETE [(±)5-hydroxy-6E,8Z,11Z,14Z-eicosatetraenoic acid]	Oxidized lipid	0.682592	0.0589858	0.704567	-0.505191	insig
MEDN763	(±)9-HETE [(±)-9-hydroxy-5Z,7E,11Z,14Z-eicosatetraenoic acid]	Oxidized lipid	0.571256	0.921315	1.03217	0.0456754	insig
MEDN765	11,12-EET [(±)11,(12)-epoxy-5Z,8Z,14Z-eicosatrienoic acid]	Oxidized lipid	0.516097	0.599034	1.0908	0.125392	insig
MEDN767	12,13-EpOME [(±)12(13)epoxy-9Z-octadecenoic acid]	Oxidized lipid	0.291248	0.993287	1.00134	0.00192737	insig
MEDN768	13-oxoODE [13-oxo-9Z,11E-octadecadienoic acid]	Oxidized lipid	1.30809	0.0243151	1.13772	0.186141	insig
MEDN769	14(S)-HDHA [14S-hydroxy-4Z,7Z,10Z,12E,16Z,19Z-docosahexaenoic acid]	Oxidized lipid	0.0462652	0.210878	0.369586	-1.43602	insig
MEDN771	15-oxoETE [15-oxo-5Z,8Z,11Z,13E-eicosatetraenoic acid]	Oxidized lipid	0.484703	0.782848	1.04709	0.0663922	insig
MEDN776	5(S),15(S)-DiHETE [5S,15S-dihydroxy-6E,8Z,10Z,13E-eicosatetraenoic acid]	Oxidized lipid	0.645297	0.0263515	0.654159	-0.612288	insig
MEDN783	9,10-EpOME [(±)9,10-epoxy-12Z-octadecenoic acid]	Oxidized lipid	0.998039	0.296056	0.929598	-0.10532	insig
MEDN784	9-oxoODE [9-oxo-10E,12Z-octadecadienoic acid]	Oxidized lipid	0.255714	0.506103	1.01034	0.0148368	insig
MEDN785	LTB4 [5S,12R-dihydroxy-6Z,8E,10E,14Z-eicosatetraenoic acid]	Oxidized lipid	0.545893	0.181959	0.785294	-0.348696	insig
MEDN795	PGF2α [9α,11α,15S-trihydroxy-prosta-5Z,13E-dien-1-oic acid]	Oxidized lipid	1.24515	5.24634e-05	0.685039	-0.545742	insig
MEDN798	PGK1 [9,11-dioxo-15S-hydroxy-prost-13E-en-1-oic acid]	Oxidized lipid	1.06186	0.0577243	0.933199	-0.099744	insig
MEDN806	Nα-Acetyl-L-glutamine	Carboxylic acids and derivatives	0.611068	0.549303	0.936847	-0.0941148	insig
MEDN813	Xylose	Carbohydrate metabolomics	1.03025	0.0186747	0.796467	-0.328314	insig
MEDN816	4-Hydroxyhippurate	Benzene and substituted derivatives	0.361065	0.399401	1.18571	0.245753	insig
MEDN818	N-acetyl-beta-alanine	Amino Acid metabolomics	1.63999	0.00297753	0.879599	-0.185082	insig
MEDN821	Scyllo inositol	Alcohol	0.546544	0.200314	0.868915	-0.202713	insig
MEDN824	7-ketodeoxycholic acid	Lipids	1.21445	0.270441	0.753379	-0.408552	insig
MEDN826	3-(3-Hydroxyphenyl)-3-hydroxypropanoic acid	Organic Acid And Its Derivatives	0.0134662	0.673767	0.893072	-0.163151	insig
MEDN827	N-acetylornithine	Organic Acid And Its Derivatives	0.415191	0.882425	0.989831	-0.0147458	insig
MEDN828	Nonadecylic acid	Lipids_Fatty Acids	2.93866	2.21206e-09	0.735039	-0.444107	insig
MEDN843	N-Amidino-L-Aspartate	Amino Acid metabolomics	0.0610967	0.929104	0.99416	-0.00844962	insig
MEDN846	Lumichrome	Others	1.03003	0.0293666	1.22742	0.295625	insig
MEDN854	Mono-Methyl Glutarate	Organic Acid And Its Derivatives	0.670111	0.0913723	1.04407	0.0622118	insig
MEDN860	3,3',5'-Triiodothyronine	Organic Acid And Its Derivatives	1.25456	0.00663156	0.900422	-0.151327	insig
MEDN861	1-Hydroxy-2-Naphthoate	Organic Acid And Its Derivatives	0.696797	0.169216	21.22	4.40735	insig
MEDN862	Phenylpyruvate	Benzene and substituted derivatives	1.16328	0.03615	0.848717	-0.236645	insig
MEDP002	D-Homocysteine	Amino Acid metabolomics	0.916514	0.0939111	0.915568	-0.127261	insig
MEDP006	Glycine	Amino Acid metabolomics	0.166964	0.845783	0.986366	-0.0198049	insig
MEDP007	L-Cystine	Amino Acid metabolomics	0.00814779	0.653036	1.02979	0.042352	insig
MEDP009	L-Tyrosine	Amino Acid metabolomics	0.678395	0.13861	0.959787	-0.0592143	insig
MEDP011	L-Lysine	Amino Acid metabolomics	1.32688	0.00250689	0.860366	-0.216978	insig
MEDP012	L-Ornithine	Amino Acid metabolomics	0.761645	0.0564046	0.875262	-0.192213	insig
MEDP013	L-Alanine	Amino Acid metabolomics	0.192878	0.809568	0.985828	-0.020592	insig
MEDP014	L-Aspartic Acid	Amino Acid metabolomics	0.923304	0.0618659	0.778263	-0.361671	insig
MEDP017	L-Histidine	Amino Acid metabolomics	1.30645	0.00167296	0.875369	-0.192037	insig
MEDP019	L-Leucine	Amino Acid metabolomics	1.10016	0.0245679	0.950839	-0.0727274	insig
MEDP020	L-Methionine	Amino Acid metabolomics	0.688702	0.0914774	0.913168	-0.131047	insig
MEDP021	L-Phenylalanine	Amino Acid metabolomics	2.78181	3.05802e-10	0.961834	-0.0561403	insig
MEDP022	L-Proline	Amino Acid metabolomics	0.275633	0.399325	0.963345	-0.0538757	insig
MEDP025	L-Tryptophan	Amino Acid metabolomics	0.255888	0.285097	0.978257	-0.0317152	insig
MEDP026	L-Valine	Amino Acid metabolomics	1.2129	0.00344548	0.926854	-0.109586	insig
MEDP028	(5-L-Glutamyl)-L-Amino Acid	Amino Acid metabolomics	0.975131	0.0290298	0.870399	-0.200252	insig
MEDP031	3-Chloro-L-Tyrosine	Amino Acid metabolomics	1.0604	0.038925	1.06468	0.0904262	insig
MEDP032	3-Hydroxy-3-Methylpentane-1,5-Dioic Acid	Amino Acid metabolomics	0.609082	3.98014e-10	0.710691	-0.492706	insig
MEDP034	3-N-Methyl-L-Histidine	Amino Acid metabolomics	0.755152	0.561027	0.845523	-0.242085	insig
MEDP036	5-Oxoproline	Amino Acid metabolomics	0.762048	0.10636	1.08343	0.115602	insig
MEDP039	Betaine	Alkaloid	0.455991	0.386466	1.03106	0.0441297	insig
MEDP044	Glutathione Reducedform	Amino Acid metabolomics	0.151265	0.665798	0.945467	-0.080901	insig
MEDP058	L-Saccharopine	Amino Acid metabolomics	1.11357	0.0284608	1.13672	0.184872	insig
MEDP059	L-Theanine	Amino Acid metabolomics	0.0743996	0.835628	0.982272	-0.0258061	insig
MEDP061	N,N-Dimethylglycine	Amino Acid metabolomics	0.542352	0.139004	0.94898	-0.0755503	insig
MEDP062	N6-Acetyl-L-Lysine	Amino Acid metabolomics	1.08169	0.0322395	0.907852	-0.139471	insig
MEDP066	N-Acetyl-L-Tyrosine	Amino Acid metabolomics	0.523159	0.484542	1.05596	0.0785485	insig
MEDP067	N-Acetylmannosamine	Amino Acid metabolomics	0.937886	0.229962	0.914475	-0.128985	insig
MEDP068	N-Acetylneuraminic Acid	Amino Acid metabolomics	0.632508	0.0226101	0.552546	-0.855832	insig
MEDP069	N-Acetylputrescine	Organic Acid And Its Derivatives	1.5657	0.00295812	1.05449	0.0765496	insig
MEDP071	N-Glycyl-L-Leucine	Amino Acid metabolomics	0.295552	0.912924	0.989177	-0.0156988	insig
MEDP075	Nα-Acetyl-L-Arginine	Amino Acid metabolomics	4.14213	6.2921e-23	0.638576	-0.647069	insig
MEDP077	Phenylacetyl-L-Glutamine	Amino Acid metabolomics	0.880527	0.207957	0.848347	-0.237274	insig
MEDP078	Phe-Phe	Amino Acid metabolomics	0.872298	0.136617	0.221592	-2.17402	insig
MEDP079	S-(5-Adenosy)-L-Homocysteine	Amino Acid metabolomics	0.24025	0.692418	1.02168	0.0309489	insig
MEDP082	S-Sulfo-L-Cysteine	Amino Acid metabolomics	0.719532	0.0555038	0.824011	-0.279265	insig
MEDP084	Trimethylamine N-Oxide	Amino Acid metabolomics	0.744804	0.42345	0.801422	-0.319366	insig
MEDP086	Urea	Amino Acid metabolomics	0.864672	0.051135	0.937579	-0.0929885	insig
MEDP087	L-Alanyl-L-Lysine	Amino Acid metabolomics	2.46847	1.19466e-06	1.65299	0.725074	insig
MEDP089	N-Acetylhistamine	Organic Acid And Its Derivatives	0.590828	0.268939	0.893191	-0.162959	insig
MEDP101	P-Coumaric Acid	Benzene and substituted derivatives	0.729285	0.124727	0.936289	-0.0949748	insig
MEDP102	Syringic Acid	Benzene and substituted derivatives	0.188835	0.357867	0.868191	-0.203916	insig
MEDP111	3-(4-Hydroxyphenyl)-Propionic Acid	Benzene and substituted derivatives	0.664996	0.442141	0.891151	-0.166257	insig
MEDP112	4-Ethylbenzoic Acid	Benzene and substituted derivatives	1.6291	0.000120238	0.937552	-0.0930294	insig
MEDP114	Phthalic Acid	Benzene and substituted derivatives	2.61977	1.56879e-09	0.941363	-0.0871766	insig
MEDP115	1,4-Dihydro-1-Methyl-4-Oxo-3-Pyridinecarboxamide	Pyridine And Pyridine Derivatives	0.5603	0.346357	0.907478	-0.140066	insig
MEDP118	4-Pyridoxic Acid	Pyridine And Pyridine Derivatives	0.134893	0.488972	1.34531	0.427942	insig
MEDP120	Theobromine	Nucleotide metabolomics	0.0814018	0.86845	0.949259	-0.0751259	insig
MEDP123	Acetylcholine Chloride	Cholines	0.273729	0.348144	0.952973	-0.0694923	insig
MEDP125	Choline	Cholines	0.919417	0.0327187	0.925447	-0.111778	insig
MEDP127	Putrescine	Polyamine	3.18734	2.44347e-15	1.22733	0.295518	insig
MEDP128	Diethanolamine	Polyamine	0.49905	0.45961	1.03541	0.0501964	insig
MEDP129	Phenethylamine	Polyamine	2.52104	1.05121e-08	0.946887	-0.0787353	insig
MEDP130	4-Nitrophenol	Phenols And Its Derivatives	0.731607	0.109436	1.06845	0.0955186	insig
MEDP134	Inositol	Carbohydrate metabolomics	0.772113	0.00624085	1.12245	0.166647	insig
MEDP135	Myoinositol	Carbohydrate metabolomics	0.764505	0.0127236	1.11128	0.152227	insig
MEDP140	Vanillin	Phenols And Its Derivatives	0.657302	0.267246	0.889688	-0.168629	insig
MEDP145	1,7-Dimethylxanthine	Nucleotide metabolomics	0.0847229	0.386096	1.26654	0.340895	insig
MEDP147	1-Methylhistidine	Amino Acid metabolomics	0.468318	0.415723	0.944147	-0.0829164	insig
MEDP150	2'-Deoxyinosine	Nucleotide metabolomics	0.0360271	0.0121132	0.698738	-0.517177	insig
MEDP152	3'-Aenylic Acid	Nucleotide metabolomics	0.674096	0.849134	0.947504	-0.0777964	insig
MEDP153	3-Methylxanthine	Nucleotide metabolomics	0.101392	0.394376	1.27427	0.349671	insig
MEDP154	5,6-Dihydro-5-Methyluracil	Nucleotide metabolomics	1.0119	0.0126616	0.877288	-0.188877	insig
MEDP156	5-Methyluridine	Nucleotide metabolomics	1.36411	0.00304829	0.90348	-0.146436	insig
MEDP157	7-Methylxanthine	Nucleotide metabolomics	0.711668	0.351644	0.953417	-0.0688211	insig
MEDP158	8-Hydroxyguanosine	Nucleotide metabolomics	0.150091	0.361887	0.758484	-0.398808	insig
MEDP159	Adenine	Nucleotide metabolomics	0.506906	0.290069	0.957135	-0.0632052	insig
MEDP160	Adenosine	Nucleotide metabolomics	0.144443	0.762816	0.983953	-0.0233389	insig
MEDP164	Cytidine-5-Monophosphate	Nucleotide metabolomics	0.842352	0.83596	0.980393	-0.028568	insig
MEDP171	Inosine	Nucleotide metabolomics	0.465904	0.108084	0.0376837	-4.72992	insig
MEDP174	Purine	Nucleotide metabolomics	2.14374	2.76436e-06	0.909984	-0.136087	insig
MEDP177	Thymine	Nucleotide metabolomics	0.949259	0.0260984	0.927856	-0.108027	insig
MEDP178	Uracil	Nucleotide metabolomics	0.523977	0.0467651	0.869418	-0.201878	insig
MEDP184	3,3',5-Triiodo-L-Thyronine	Hormones	1.77671	1.60124e-05	0.873974	-0.194338	insig
MEDP186	L-Thyroxine	Hormones	1.84036	4.39692e-05	0.865101	-0.20906	insig
MEDP188	Norepinephrine	Hormones	1.60039	0.000318435	0.84093	-0.249942	insig
MEDP205	L-Carnitine	Camitine	0.223235	0.585807	1.02428	0.0346144	insig
MEDP211	Melatonin	Tryptamines And Its Derivatives	0.74363	0.39061	0.918722	-0.1223	insig
MEDP224	D-Fructose	Carbohydrate metabolomics	1.02697	0.00032952	1.15326	0.205723	insig
MEDP227	D-Mannose	Carbohydrate metabolomics	1.02876	0.000280856	1.15362	0.206163	insig
MEDP229	Lactose	Carbohydrate metabolomics	0.0188379	0.21452	0.872656	-0.196516	insig
MEDP230	Maltose	Carbohydrate metabolomics	0.735614	0.0215855	1.12544	0.170487	insig
MEDP232	N-Acetyl-D-Glucosamine	Carbohydrate metabolomics	0.696747	0.0184583	0.851714	-0.231559	insig
MEDP233	Raffinose	Carbohydrate metabolomics	0.370393	0.57394	1.07264	0.101168	insig
MEDP236	Gluconic Acid	Carbohydrate metabolomics	1.6476	0.000235049	0.926857	-0.109581	insig
MEDP239	L-Ascorbate	CoOthersEnzyme Factor & vitamin	0.515816	0.0110576	0.839071	-0.253136	insig
MEDP242	Nicotinamide	CoOthersEnzyme Factor & vitamin	1.04587	0.0560959	0.755603	-0.4043	insig
MEDP246	Nicotinic Acid	CoOthersEnzyme Factor & vitamin	1.40084	0.00235296	0.71173	-0.490599	insig
MEDP247	Nicotinuric Acid	CoOthersEnzyme Factor & vitamin	0.11482	0.976871	0.997735	-0.0032707	insig
MEDP249	Pantothenol	CoOthersEnzyme Factor & vitamin	0.652092	0.099751	0.740713	-0.433014	insig
MEDP250	Riboflavin	CoOthersEnzyme Factor & vitamin	0.0419651	0.351085	1.32432	0.40525	insig
MEDP251	Trigonelline	CoOthersEnzyme Factor & vitamin	0.118226	0.797781	1.10489	0.143901	insig
MEDP270	3-Indolebutyric Acid	Indole And Its Derivatives	0.706149	0.237045	0.862718	-0.213039	insig
MEDP271	3-Indolepropionic Acid	Indole And Its Derivatives	0.325405	0.851859	0.925346	-0.111935	insig
MEDP272	5-Hydroxyindole-3-Acetic Acid	Indole And Its Derivatives	0.549114	0.154358	1.37155	0.455805	insig
MEDP274	Indole-2-Carboxylic Acid	Indole And Its Derivatives	0.660612	0.558313	0.950653	-0.0730098	insig
MEDP275	Indole-3-Acetic Acid	Indole And Its Derivatives	1.00057	0.0458647	0.668531	-0.580934	insig
MEDP276	Indole-3-Carboxaldehyde	Indole And Its Derivatives	0.244831	0.511619	1.0756	0.10514	insig
MEDP277	Methyl Indole-3-Acetate	Indole And Its Derivatives	0.186182	0.811447	0.942314	-0.0857199	insig
MEDP285	2,6-Diaminooimelic Acid	Organic Acid And Its Derivatives	0.443605	0.333015	0.920955	-0.118798	insig
MEDP291	3,7-Dimethyluric Acid	Organic Acid And Its Derivatives	0.205273	0.244154	1.58007	0.659988	insig
MEDP294	3-Methylcrotonyl Glycine	Organic Acid And Its Derivatives	0.819535	0.0932149	0.790083	-0.339923	insig
MEDP295	4-Acetamidobutyric Acid	Organic Acid And Its Derivatives	0.324008	0.547392	0.960874	-0.0575807	insig
MEDP296	4-Guanidinobutyric Acid	Organic Acid And Its Derivatives	0.389799	0.361171	0.954186	-0.0676577	insig
MEDP297	5-Aminovaleric Acid	Organic Acid And Its Derivatives	0.462795	0.402173	1.05292	0.0743977	insig
MEDP298	6-Aminocaproic Acid	Organic Acid And Its Derivatives	1.02129	0.0259879	0.888402	-0.170715	insig
MEDP299	7-Methyluric Acid	Organic Acid And Its Derivatives	0.272361	0.482205	0.99197	-0.0116315	insig
MEDP303	Chlorogenic Acid	Organic Acid And Its Derivatives	0.2017	0.717092	0.873455	-0.195194	insig
MEDP305	Creatinine	Organic Acid And Its Derivatives	0.703771	0.147382	0.933773	-0.0988562	insig
MEDP307	Dl-2-Aminooctanoic Acid	Organic Acid And Its Derivatives	0.236373	0.562596	0.944256	-0.0827497	insig
MEDP310	D-Pipecolinic Acid	Organic Acid And Its Derivatives	1.46382	0.000834119	0.85054	-0.23355	insig
MEDP313	Guanidineacetic Acid	Organic Acid And Its Derivatives	1.37414	0.00739955	1.17297	0.230166	insig
MEDP315	Hippuric Acid	Organic Acid And Its Derivatives	0.0163681	0.640648	1.09222	0.127259	insig
MEDP316	Homovanillic Acid	Organic Acid And Its Derivatives	0.676423	0.161926	0.943873	-0.0833352	insig
MEDP317	Hydrocinnamic Acid	Organic Acid And Its Derivatives	1.81639	0.00114862	0.840805	-0.250156	insig
MEDP321	L-Dihydroorotic Acid	Organic Acid And Its Derivatives	0.516679	2.3841e-06	0.790921	-0.338394	insig
MEDP322	L-Homoserine	Organic Acid And Its Derivatives	0.227253	0.991642	1.00053	0.000757353	insig
MEDP325	Maleic Acid	Organic Acid And Its Derivatives	0.434142	0.19258	0.923576	-0.114698	insig
MEDP326	N'-Formylkynurenine	Organic Acid And Its Derivatives	0.503801	0.232614	1.26987	0.344683	insig
MEDP328	P-Aminohippuric Acid	Organic Acid And Its Derivatives	0.258846	0.325857	0.924174	-0.113763	insig
MEDP330	Sebacate	Organic Acid And Its Derivatives	1.221	0.079287	0.849078	-0.236031	insig
MEDP332	Cinnamic Acid	Organic Acid And Its Derivatives	1.34946	0.00695176	0.894343	-0.1611	insig
MEDP333	Uric Acid	Organic Acid And Its Derivatives	0.393097	0.501445	1.03109	0.0441762	insig
MEDP336	Lysopc 14:0	LipidsOthersPhospholipid	0.801398	0.11754	0.906003	-0.142413	insig
MEDP338	Lysopc 16:0	LipidsOthersPhospholipid	2.53395	4.72537e-09	0.952082	-0.0708427	insig
MEDP340	Lysopc 16:1	LipidsOthersPhospholipid	0.807111	0.186348	0.914777	-0.128508	insig
MEDP342	Lysopc 18:0	LipidsOthersPhospholipid	0.945399	0.0200213	0.944414	-0.0825084	insig
MEDP344	Lysopc 18:1	LipidsOthersPhospholipid	0.804449	0.0810422	0.952854	-0.0696734	insig
MEDP346	Lysopc 18:2	LipidsOthersPhospholipid	0.468905	0.168794	0.972668	-0.039981	insig
MEDP350	Lysopc 20:1	LipidsOthersPhospholipid	0.437862	0.113838	0.894854	-0.160276	insig
MEDP352	Lysopc 20:2	LipidsOthersPhospholipid	0.00423609	0.867289	0.989242	-0.0156048	insig
MEDP361	4-Hydroxybenzaldehyde	Benzene and substituted derivatives	0.676417	0.159168	0.943328	-0.0841687	insig
MEDP365	Cotinine N-Oxide	Benzene and substituted derivatives	0.109512	0.466225	0.92536	-0.111913	insig
MEDP368	Taurocholic Acid Sodium Salt Hydrate	Organic Acid And Its Derivatives	1.78766	0.000103996	0.959283	-0.0599722	insig
MEDP370	2-(Formylamino)Benzoic Acid	Benzene and substituted derivatives	1.60013	0.000881208	0.892837	-0.163532	insig
MEDP371	Acetaminophen Glucuronide	Carbohydrate metabolomics	0.643342	0.316322	0.927842	-0.108049	insig
MEDP372	Uridine 5-Monophosphate	Nucleotide metabolomics	0.367446	0.82905	1.01853	0.0264825	insig
MEDP373	N-Acetylglycine	Amino Acid metabolomics	0.468079	0.300563	1.03578	0.0507135	insig
MEDP374	Cyclic Amp	Nucleotide metabolomics	0.432998	0.901581	0.99319	-0.00985892	insig
MEDP378	N6-Succinyl Adenosine	Nucleotide metabolomics	0.978379	0.0589809	0.903113	-0.147021	insig
MEDP380	2-(Dimethylamino)Guanosine	Nucleotide metabolomics	0.813406	0.1998	0.936875	-0.0940714	insig
MEDP381	7-Methylguanine	Nucleotide metabolomics	1.725	0.000203735	0.90706	-0.14073	insig
MEDP384	Isoxanthopterin	Pteridines and derivatives	0.82469	0.0996122	0.895948	-0.158513	insig
MEDP386	N-Acetylthreonine	Amino Acid metabolomics	0.389911	0.0977424	0.879402	-0.185405	insig
MEDP387	H-Homoarg-Oh	Amino Acid metabolomics	0.404217	0.712991	1.02823	0.0401585	insig
MEDP389	Pantetheine	CoOthersEnzyme Factor & vitamin	0.680289	0.219006	0.980051	-0.029071	insig
MEDP391	Menaquinone	CoOthersEnzyme Factor & vitamin	0.807543	0.000139768	1.2623	0.336059	insig
MEDP394	4-Hydroxyretinoic Acid	CoOthersEnzyme Factor & vitamin	0.0245673	0.0456218	0.842421	-0.247387	insig
MEDP395	L-Pipecolic Acid	Amino Acid metabolomics	0.0668498	0.913918	1.01145	0.0164274	insig
MEDP401	5'-Deoxy-5'-(Methylthio) Adenosine	Nucleotide metabolomics	0.749996	0.012169	1.22444	0.292121	insig
MEDP404	Sarcosine	Amino Acid metabolomics	3.03134	7.19237e-12	1.19539	0.257478	insig
MEDP405	3-Aminoisobutanoic Acid	Amino Acid metabolomics	0.619281	0.157689	0.939534	-0.0899831	insig
MEDP408	11-Cis-Retinol	CoOthersEnzyme Factor & vitamin	1.90409	3.8016e-05	0.857876	-0.221158	insig
MEDP410	Trans-Citridic Acid	Organic Acid And Its Derivatives	0.195406	2.79962e-13	0.614064	-0.70354	insig
MEDP416	6-Phosphogluconic Acid Trisodium Salt	Carbohydrate metabolomics	0.187022	0.739367	1.01923	0.0274829	insig
MEDP428	Cholesterol	Lipids	1.32852	0.0177586	1.11139	0.152363	insig
MEDP429	Punicic Acid	Lipids_Fatty Acids	0.710645	0.142249	0.973279	-0.0390742	insig
MEDP430	2-Aminoadipic Acid	Organic Acid And Its Derivatives	0.261771	0.445151	1.05701	0.0799907	insig
MEDP431	Hordenine	Benzene and substituted derivatives	1.35353	0.00657829	0.893861	-0.161878	insig
MEDP434	Lysopc 17:0	LipidsOthersPhospholipid	0.642541	0.150129	0.917664	-0.123963	insig
MEDP435	6-Methylmercaptopurine	Nucleotide metabolomics	2.82479	1.32648e-10	0.951381	-0.0719043	insig
MEDP437	Ergothioneine	Organic Acid And Its Derivatives	0.525969	0.919686	1.01563	0.0223733	insig
MEDP440	Methoxyindoleacetic Acid	Indole And Its Derivatives	0.217594	0.968	1.0015	0.00215988	insig
MEDP442	Sn-Glycero-3-Phosphocholine	Cholines	1.24708	0.103704	1.21716	0.283521	insig
MEDP443	10-Formyl-Thf	Pteridines and derivatives	0.109429	0.255993	0.883923	-0.178007	insig
MEDP450	P-Aminobenzoate	Benzene and substituted derivatives	0.323729	0.802795	0.979655	-0.0296549	insig
MEDP453	Indole	Indole And Its Derivatives	0.427376	0.210292	0.96328	-0.0539722	insig
MEDP454	Isoquinoline	Benzene and substituted derivatives	0.464349	0.537999	0.944284	-0.0827079	insig
MEDP456	Piperidine	Benzene and substituted derivatives	0.921172	0.0380716	0.885569	-0.175324	insig
MEDP457	5-Aminolevulinate	Organic Acid And Its Derivatives	1.22775	0.00814431	0.865817	-0.207867	insig
MEDP494	Lysopc 15:0	LipidsOthersPhospholipid	1.04947	0.0549645	0.895363	-0.159456	insig
MEDP498	Lysopc 18:3	LipidsOthersPhospholipid	1.17057	0.0138858	0.959962	-0.0589509	insig
MEDP507	2-Hydroxycinnamic acid	Benzene and substituted derivatives	0.633814	0.170771	0.947532	-0.077753	insig
MEDP509	trans-3-Indoleacrylic acid	Organic Acid And Its Derivatives	0.505427	0.138596	0.946463	-0.0793817	insig
MEDP510	Acetyl-L-carnitine	Camitine	0.540896	0.25779	0.967054	-0.0483319	insig
MEDP513	Hexadecanamide	Lipids_Fatty Acids	0.568227	0.173894	0.796242	-0.328722	insig
MEDP514	Thiamine	CoOthersEnzyme Factor & vitamin	0.00811959	0.291742	2.53078	1.33958	insig
MEDP517	Palmitoylcarnitine	Camitine	0.625265	0.8859	0.97315	-0.0392657	insig
MEDP518	DL-Stachydrine	Organic Acid And Its Derivatives	2.73748	1.85293e-15	0.673287	-0.570706	insig
MEDP519	L-Norleucine	Amino Acid metabolomics	0.729025	0.0633026	0.939463	-0.0900924	insig
MEDP523	DL-Carnitine	Camitine	0.227768	0.658235	0.976603	-0.0341562	insig
MEDP525	N-Acetyl-L-alanine	Organic Acid And Its Derivatives	0.40936	0.302122	0.901011	-0.150384	insig
MEDP529	Indole-3-acetamide	Indole And Its Derivatives	0.733264	0.14652	0.900995	-0.15041	insig
MEDP535	Triethyl phosphate	Organic Acid And Its Derivatives	0.451978	0.174527	0.517108	-0.951463	insig
MEDP537	PAF C-16	Lipids	1.0253	0.0118385	0.944917	-0.0817408	insig
MEDP540	7,8-dihydro-L-Biopterin	Pteridines and derivatives	0.959706	0.146017	1.10348	0.142055	insig
MEDP541	δ-Valerolactam	Pyridine And Pyridine Derivatives	0.0080163	0.439356	0.881714	-0.181618	insig
MEDP545	2-Pyrrolidinone	Benzene and substituted derivatives	0.139031	0.826762	0.984457	-0.0225994	insig
MEDP546	Oxindole	Indole And Its Derivatives	0.407845	0.0633612	0.770434	-0.376257	insig
MEDP561	Farnesene	Lipids_Fatty Acids	1.19817	0.0134268	0.952294	-0.0705213	insig
MEDP574	Oleamide	Lipids_Fatty Acids	0.770024	0.0801014	0.73948	-0.435417	insig
MEDP575	5-amino-1-[3,4-dihydroxy-5-(hydroxymethyl)oxolan-2-yl]imidazole-4-carboxamide	Nucleotide metabolomics	0.915443	0.704964	0.937904	-0.0924876	insig
MEDP576	N1-Acetylspermine	Organic Acid And Its Derivatives	0.784293	0.214323	0.849091	-0.236009	insig
MEDP577	Isobutyryl carnitine	Camitine	0.57432	0.187279	0.905155	-0.143763	insig
MEDP578	alpha-Cadinene	Lipids_Fatty Acids	0.790556	0.0812319	1.04082	0.0577271	insig
MEDP579	gamma-Muurolene	Lipids_Fatty Acids	0.149687	0.43616	0.972234	-0.0406242	insig
MEDP581	10E,12Z-Octadecadienoic acid	Lipids_Fatty Acids	0.582432	0.123261	1.3258	0.406864	insig
MEDP583	Asp-Phe methyl ester	Organic Acid And Its Derivatives	1.02215	0.111174	0.917833	-0.123697	insig
MEDP584	Pterine	Pteridines and derivatives	0.305067	0.579078	0.975687	-0.0355098	insig
MEDP585	Stearidonic Acid	Lipids_Fatty Acids	0.923856	0.168834	0.879713	-0.184895	insig
MEDP586	N-Acetylphenylalanine	Organic Acid And Its Derivatives	0.516724	0.513237	1.04792	0.0675288	insig
MEDP587	N-Alpha-acetyllysine	Organic Acid And Its Derivatives	0.366664	0.324371	1.107	0.14665	insig
MEDP590	p-Mentha-1,3,8-triene	Lipids_Fatty Acids	0.146535	0.981193	0.99715	-0.00411734	insig
MEDP594	Dihydroactinidiolide	Benzene and substituted derivatives	0.854823	0.239545	0.779207	-0.359922	insig
MEDP598	2'-Hydroxy-5'-methylacetophenone	Benzene and substituted derivatives	1.92496	0.000314996	0.875617	-0.191628	insig
MEDP602	1-(4-Methoxyphenyl)-2-propanone	Benzene and substituted derivatives	0.021773	0.951234	0.996345	-0.00528301	insig
MEDP603	Cuminaldehyde	Lipids_Fatty Acids	1.3215	0.00798823	0.896031	-0.158379	insig
MEDP606	2-(3,4-dimethoxyphenyl)ethanamine	Benzene and substituted derivatives	0.660491	0.158241	0.948354	-0.0765021	insig
MEDP611	N-Acetyl-L-Histidine	Organic Acid And Its Derivatives	0.884725	0.0629307	0.865752	-0.207974	insig
MEDP612	(S)-2,3-epoxysqualene	Terpenoid	0.234902	0.383059	1.19587	0.258059	insig
MEDP617	2-Furoylglycine	Amino Acid metabolomics	0.0534956	0.859499	1.03144	0.0446572	insig
MEDP618	2-Methylbutyroylcarnitine	Lipids_Fatty Acids	0.316737	0.603196	0.960653	-0.0579127	insig
MEDP627	Isonicotinic acid	Organic Acid And Its Derivatives	0.0893851	0.701891	0.989749	-0.0148659	insig
MEDP631	Dimethyl fumarate	Lipids_Fatty Acids	2.62582	7.31959e-16	0.66295	-0.593028	insig
MEDP632	beta-Cubebene	Lipids_Fatty Acids	0.18608	0.675307	1.01167	0.0167375	insig
MEDP634	cis-gondoic acid	Lipids_Fatty Acids	0.73208	0.0704102	0.773883	-0.369813	insig
MEDP636	Furfural	Organic Acid And Its Derivatives	0.0709973	0.797732	0.993291	-0.00971194	insig
MEDP637	L-phenylalanyl-L-proline	Organic Acid And Its Derivatives	0.475885	0.334073	0.933461	-0.099339	insig
MEDP638	LysoPE(16:1(9Z)-0:0)	Lipids_Fatty Acids	0.958045	0.0780158	0.817209	-0.291223	insig
MEDP642	3-Hydroxy-DL-kynurenine	Amino Acid metabolomics	0.752593	0.32965	0.921633	-0.117736	insig
MEDP652	Methyl cinnamate	Benzene and substituted derivatives	0.0695324	0.986469	0.999771	-0.000329905	insig
MEDP653	Benzylcinnamate	Benzene and substituted derivatives	0.646759	0.208209	1.03413	0.0484163	insig
MEDP654	2-Phenylacetamide	Benzene and substituted derivatives	0.181772	0.173996	0.815808	-0.293698	insig
MEDP656	Isoamyl butyrate	Fatty acyls	0.510706	1.28769e-06	0.784872	-0.349471	insig
MEDP658	Ethyl dodecanoate	Fatty acyls	1.27536	0.00902893	0.937399	-0.0932648	insig
MEDP659	Propylpropionate	Fatty acyls	0.69873	0.0015816	1.23475	0.304225	insig
MEDP660	1,4-Xylene	Benzene and substituted derivatives	0.104895	0.824471	0.99502	-0.00720187	insig
MEDP668	m-Cresol	Phenols And Its Derivatives	0.095183	0.803732	0.992656	-0.0106344	insig
MEDP670	2,6-Dimethylpyridine	Pyridine And Pyridine Derivatives	0.0570786	0.630812	1.02478	0.0353186	insig
MEDP672	Cyclohexylamine	Amines	0.49671	0.272206	0.834493	-0.261027	insig
MEDP676	Butyl 3-methylbutanoate	Fatty acyls	0.466147	2.94551e-08	0.743094	-0.428383	insig
MEDP677	Butylamine	Amines	0.16276	0.960385	0.997201	-0.00404334	insig
MEDP681	2,2,2-Trichloroethanol	Alcohol	0.0963464	0.792567	1.0046	0.00661551	insig
MEDP682	Hydroxyacetone	Ketones	0.134388	0.00557269	0.791465	-0.337402	insig
MEDP685	Methylcysteine	Amino Acid metabolomics	0.368589	0.416507	0.966417	-0.0492829	insig
MEDP686	2-Acetylfuran	Heterocyclic compound	0.769406	0.108743	0.954648	-0.0669596	insig
MEDP688	Benzophenone	Benzene and substituted derivatives	1.43502	0.00330093	0.956672	-0.0639036	insig
MEDP689	TranexamicAcid	Organic Acid And Its Derivatives	1.00746	0.0174404	1.1091	0.149394	insig
MEDP695	Methyl tetradecanoate	Fatty acyls	0.00231741	0.926698	0.99857	-0.00206425	insig
MEDP697	2,6-Di-tert-butyl-4-methylphenol	Benzene and substituted derivatives	1.08158	0.160629	0.780614	-0.357319	insig
MEDP701	(E)-2-Octen-1-ol	Alcohol	0.327685	0.859236	0.978288	-0.0316694	insig
MEDP707	2-Pentadecanone	Ketones	1.14276	0.00889383	0.973912	-0.0381369	insig
MEDP709	Methyl dihydrojasmonate	Organic Acid And Its Derivatives	1.79589	0.000128912	0.96682	-0.0486805	insig
MEDP710	Hexyl butyrate	Fatty acyls	1.42143	0.00188863	1.10023	0.137811	insig
MEDP716	cis-Citral	Aldehyde	0.556232	0.160519	0.954918	-0.0665512	insig
MEDP718	Methylisobutyrate	Organic Acid And Its Derivatives	3.04062	9.76227e-09	0.684716	-0.546421	insig
MEDP719	N-Nitrosodiethylamine	Polyamine	3.08167	1.54381e-08	0.65926	-0.60108	insig
MEDP724	3,5-Dinitrosalicylic acid	Organic Acid And Its Derivatives	0.78004	0.0739738	0.968601	-0.0460258	insig
MEDP729	Barbituric acid	Heterocyclic compound	0.295417	0.89377	0.983268	-0.0243437	insig
MEDP733	o-Xylene	Benzene and substituted derivatives	0.24327	0.727838	0.992452	-0.0109304	insig
MEDP736	1,3-diisopropylbenzene	Benzene and substituted derivatives	1.95914	8.17902e-06	0.94274	-0.0850674	insig
MEDP738	carene	Heterocyclic compound	2.11593	2.37018e-06	0.941574	-0.0868531	insig
MEDP739	Hexyl??Acetate	Fatty acyls	2.62593	1.19681e-09	1.41499	0.500795	insig
MEDP740	Farnesol	Alcohol	0.26748	0.982412	1.00144	0.00207105	insig
MEDP742	Terpinolene	Terpenoid	1.18179	0.0232463	0.965436	-0.050748	insig
MEDP746	gamma-Terpinene	Terpenoid	0.313996	0.46558	0.887362	-0.172406	insig
MEDP747	alpha-Terpinene	Terpenoid	3.04318	5.4322e-12	0.901525	-0.149561	insig
MEDP752	DL-Leucine	Amino Acid metabolomics	1.15214	0.0180203	0.949725	-0.0744186	insig
MEDP759	Glycyrrhetinic acid	Terpenoid	0.499839	0.385526	2.90785	1.53995	insig
MEDP760	9-Fluorenone	Ketones	2.13916	3.95792e-06	0.846577	-0.240287	insig
MEDP765	3-(Methylthio)-1-propanol	Alcohol	0.248246	0.554967	0.986679	-0.0193474	insig
MEDP767	Aspirin	Organic Acid And Its Derivatives	0.802276	4.94942e-05	1.18178	0.240965	insig
MEDP778	Ethyl butyrate	Fatty acyls	0.629767	0.00914087	1.18754	0.247982	insig
MEDP781	2-Undecanone	Ketones	1.65553	0.015489	0.848733	-0.236616	insig
MEDP783	10-UNDECENOIC ACID	Fatty acyls	1.96214	4.0776e-11	0.784467	-0.350216	insig
MEDP784	Undecanal	Aldehyde	1.70123	0.0101223	0.841802	-0.248446	insig
MEDP789	2-Pentyl-3-phenyl-2-propenal	Aldehyde	1.32308	0.0110946	0.978138	-0.0318905	insig
MEDP791	4-aminophenol	Phenols And Its Derivatives	0.0972159	0.33746	0.947825	-0.0773076	insig
MEDP792	PYRROLIDINE	Heterocyclic compound	0.918393	0.0244915	0.905905	-0.142568	insig
MEDP794	Octanal	Aldehyde	0.473603	0.686543	0.950475	-0.0732793	insig
MEDP796	Pyrene	Benzene and substituted derivatives	1.98987	3.42705e-05	0.966087	-0.0497752	insig
MEDP799	(-)-Menthone	Ketones	0.245518	0.664488	1.00805	0.0115702	insig
MEDP811	2-(Methylthio)benzothiazole	Benzene and substituted derivatives	1.2812	0.880884	0.990725	-0.0134433	insig
MEDP812	5-METHYLFURFURAL	Aldehyde	0.307151	3.02644e-09	0.690782	-0.533697	insig
MEDP814	METHYL VALERATE	Fatty acyls	0.643616	0.709024	1.02773	0.0394554	insig
MEDP815	N-ETHYLACETAMIDE	Amines	1.08917	8.51176e-05	1.24482	0.315936	insig
MEDP817	PROPYL HEXANOATE	Fatty acyls	0.376647	2.63906e-10	0.689543	-0.536288	insig
MEDP818	1-PENTADECANOL	Alcohol	0.798319	0.0553958	1.04001	0.0566031	insig
MEDP828	2-Methyl-1-propanol	Alcohol	0.0250501	0.245873	0.878852	-0.186308	insig
MEDP831	1-Aminopropan-2-ol	Alcohol	0.886855	0.236514	0.721478	-0.470972	insig
MEDP836	Dibutyl phthalate	Benzene and substituted derivatives	0.635405	0.235519	0.981482	-0.0269664	insig
MEDP839	Pulegone	Ketones	0.772682	0.118187	0.954217	-0.0676114	insig
MEDP843	ETHYL ISOBUTYRATE	Fatty acyls	0.771415	0.103489	1.13564	0.183505	insig
MEDP844	FURFURYL ALCOHOL	Alcohol	0.746236	0.0443332	1.08659	0.119809	insig
MEDP845	1-Phenylethanol	Benzene and substituted derivatives	1.78684	8.09498e-07	1.16669	0.22242	insig
MEDP853	Choline chloride	Others	0.585153	0.132906	0.938685	-0.0912865	insig
MEDP855	caprate (10:0)	Lipids	0.37392	0.250053	1.03349	0.047527	insig
MEDP856	Isobutyl decanoate	Fatty acyls	0.372796	0.343008	1.02022	0.0288783	insig
MEDP859	glycylphenylalanine	Amino Acid metabolomics	1.47619	0.00118378	0.576485	-0.794644	insig
MEDP860	L-Glutamic acid	Amino Acid metabolomics	0.217229	0.340745	0.910658	-0.135019	insig
MEDP863	proline betaine	Organic Acid And Its Derivatives	0.154228	0.628138	1.01639	0.0234593	insig
MEDP865	Bisphenol propane	Benzene and substituted derivatives	0.546857	0.152548	1.04214	0.0595527	insig
MEDP867	Vitamin E	CoOthersEnzyme Factor & vitamin	0.207623	0.502351	0.971306	-0.0420015	insig
MEDP868	N-methylalanine	Amino Acid metabolomics	0.281776	0.368372	0.96692	-0.0485316	insig
MEDP871	sphinganine	Lipids	1.46387	0.00896051	1.19016	0.251154	insig
MEDP872	Glycerophosphatidylcholine	Lipids	0.822777	0.128712	1.21543	0.281463	insig
MEDP873	3'-UMP	Nucleotide metabolomics	0.992259	0.0420905	1.10389	0.142594	insig
MEDP874	tryptophan betaine	Organic Acid And Its Derivatives	0.704444	0.0325339	1.36729	0.451316	insig
MEDP876	O-Succinyl-L-Homoserine	Amino Acid metabolomics	0.153175	0.8335	0.984925	-0.0219148	insig
MEDP877	Cytidine 5'-Diphosphocholine	Nucleotide metabolomics	0.716507	0.323889	1.06673	0.0931997	insig
MEDP878	N-Methyl-L-Glutamate	Amino Acid metabolomics	0.501707	0.371456	1.07096	0.0989035	insig
MEDP879	N-Methyl-D-Aspartic Acid	Amino Acid metabolomics	0.455429	0.535708	0.927118	-0.109176	insig
MEDP881	Phosphocholine	Nucleotide metabolomics	2.99411	1.55059e-17	0.640474	-0.642787	insig
MEDP883	2,4-Dihydroxypteridine	Pteridines and derivatives	0.609768	0.200759	0.945928	-0.0801972	insig
MEDP884	L-Methionine Sulfoximine	Organic Acid And Its Derivatives	0.551625	0.418768	1.06554	0.0915832	insig
MEDP888	2'-Deoxycytidine 5'-Diphosphate	Nucleotide metabolomics	0.947824	0.121307	1.16498	0.220306	insig
MEDP889	Cortisol	Lipids	0.163362	0.750994	1.02166	0.0309193	insig
MEDP891	L-Tryptophanamide	Amino Acid metabolomics	2.11505	0.00625232	0.399199	-1.32482	down
MEDP904	Oleate	Lipids	0.831083	0.0667209	0.727381	-0.459216	insig

## Sheet: wAMD and controls
The OPLS results of wAMD and control
Index	Compounds	Class	VIP	P value	Fold_Change	Log2FC	Type
MEDN005	L-Threonine	Amino Acid metabolomics	1.27398	1.87455e-06	1.29064	0.368092	insig
MEDN007	L-Arginine	Amino Acid metabolomics	0.285933	0.185942	0.891413	-0.165835	insig
MEDN010	L-Citrulline	Amino Acid metabolomics	0.487848	0.0185455	1.11238	0.153651	insig
MEDN011	L-Glutamic Acid	Amino Acid metabolomics	0.277269	0.103043	1.15092	0.202789	insig
MEDN013	L-Isoleucine	Amino Acid metabolomics	0.325174	0.334432	0.947114	-0.0783904	insig
MEDN017	L-Pyroglutamic Acid	Amino Acid metabolomics	0.659661	0.0841172	1.23314	0.302334	insig
MEDN018	L-Serine	Amino Acid metabolomics	1.54845	7.11216e-07	1.24042	0.310829	insig
MEDN030	5-Hydroxy-L-Tryptophan	Amino Acid metabolomics	0.427425	0.0156827	1.25307	0.325463	insig
MEDN033	Asp-Phe	Amino Acid metabolomics	0.398704	0.0339571	4.25721	2.08991	insig
MEDN041	Hexanoyl Glycine	Amino Acid metabolomics	0.742925	0.000349002	1.65398	0.725943	insig
MEDN042	L-Asparagine Anhydrous	Amino Acid metabolomics	0.148792	0.673023	1.01682	0.0240623	insig
MEDN043	L-Carnosine	Amino Acid metabolomics	0.250669	0.522134	1.04922	0.0693168	insig
MEDN045	L-Cysteine	Amino Acid metabolomics	1.12466	3.44973e-06	1.1442	0.19434	insig
MEDN046	L-Glutamine	Amino Acid metabolomics	0.822661	0.000884793	1.08299	0.115015	insig
MEDN047	L-Homocitrulline	Amino Acid metabolomics	0.347506	0.824383	1.02582	0.0367739	insig
MEDN051	Methionine Sulfoxide	Amino Acid metabolomics	0.428896	0.000191646	1.28863	0.365843	insig
MEDN055	N-Acetyl-L-Glutamic Acid	Amino Acid metabolomics	0.534954	0.00105738	1.69887	0.764574	insig
MEDN056	N-Acetyl-L-Leucine	Amino Acid metabolomics	0.766564	0.0778093	1.41282	0.498573	insig
MEDN060	N-Isovaleroylglycine	Amino Acid metabolomics	0.538552	0.387151	1.14128	0.190652	insig
MEDN061	N-Phenylacetylglycine	Amino Acid metabolomics	0.564041	0.369934	1.32485	0.405834	insig
MEDN065	O-Phospho-L-Serine	Amino Acid metabolomics	0.109589	0.101465	1.22798	0.296282	insig
MEDN072	Trans-4-Hydroxy-L-Proline	Amino Acid metabolomics	0.390824	0.113652	1.06683	0.093335	insig
MEDN084	Benzoic Acid	Benzene and substituted derivatives	0.11117	0.773859	0.98683	-0.0191263	insig
MEDN086	Terephthalic Acid	Benzene and substituted derivatives	0.773734	0.0176884	1.03632	0.0514676	insig
MEDN087	(3,4-Dimethoxyphenyl) Acetic Acid	Benzene and substituted derivatives	1.29939	1.10878e-05	1.28329	0.359852	insig
MEDN090	2-Methoxybenzoic Acid	Benzoic Acid And Its Derivatives	1.94067	2.01478e-05	2.4212	1.27573	up
MEDN092	3,4-Dihydroxybenzeneacetic Acid	Benzene and substituted derivatives	0.195353	0.106024	1.05319	0.0747632	insig
MEDN093	3-Hydroxyanthranilic Acid	Benzoic Acid And Its Derivatives	0.990186	0.00183715	1.45976	0.54573	insig
MEDN097	P–Hydroxyphenyl Acetic Acid	Benzene and substituted derivatives	0.869272	0.00314811	1.42462	0.51058	insig
MEDN105	Taurocholic Acid	Bile Acids	0.382181	0.166246	1.54042	0.623319	insig
MEDN109	Hyodeoxycholic Acid	Bile Acids	0.240409	0.904156	0.961748	-0.056269	insig
MEDN110	Glycoursodeoxycholic Acid	Bile Acids	0.246249	0.884759	0.970355	-0.0434161	insig
MEDN112	Glycocholic Acid	Bile Acids	0.177048	0.734081	0.934421	-0.0978561	insig
MEDN113	Glycochenodeoxycholic Acid	Bile Acids	0.355506	0.228635	0.869092	-0.202418	insig
MEDN115	Chenodeoxycholic Acid	Bile Acids	0.0904166	0.0229025	1.65066	0.723041	insig
MEDN124	Protocatechuic Acid	Phenols And Its Derivatives	0.781074	0.000351065	1.67484	0.744025	insig
MEDN139	1-Methylxanthine	Nucleotide metabolomics	1.33048	1.7994e-05	3.95261	1.98281	up
MEDN140	2,6-Dihydroxypurine	Nucleotide metabolomics	0.843693	0.000643802	1.65224	0.724427	insig
MEDN147	5-Methylcytosine	Nucleotide metabolomics	0.158916	0.831406	1.00985	0.0141459	insig
MEDN163	Hypoxanthine	Nucleotide metabolomics	0.387802	0.0268629	3.17665	1.66751	insig
MEDN168	Thymidine	Nucleotide metabolomics	0.230002	0.272957	1.1364	0.184469	insig
MEDN171	Uridine	Nucleotide metabolomics	0.506425	0.00787299	1.15877	0.212599	insig
MEDN172	Β-Nicotinamide Mononucleotide	Nucleotide metabolomics	0.193192	0.0320079	1.11789	0.160774	insig
MEDN178	Epinephrine	Hormones	0.665259	0.00772221	1.03881	0.0549288	insig
MEDN196	Pyrroloquinoline Quinone	Organic Acid And Its Derivatives	0.128462	0.0122711	1.61072	0.687703	insig
MEDN198	Citric Acid	Amino Acid metabolomics	0.904834	2.38819e-07	1.64651	0.719415	insig
MEDN201	Succinic Acid	Amino Acid metabolomics	1.46009	7.86381e-08	1.39278	0.477971	insig
MEDN202	A-Ketoglutaric Acid	Amino Acid metabolomics	1.11834	0.0965578	2.03329	1.02381	insig
MEDN209	Tryptamine	Tryptamines And Its Derivatives	0.260795	0.02469	1.2995	0.377959	insig
MEDN213	D-Sorbitol	Carbohydrate metabolomics	0.202337	0.659416	1.04202	0.059379	insig
MEDN220	D-Glucose	Carbohydrate metabolomics	0.833571	0.0117949	1.15985	0.21394	insig
MEDN224	D-Trehalose	Carbohydrate metabolomics	1.0064	0.00147637	0.865579	-0.208263	insig
MEDN226	D-Erythronolactone	Carbohydrate metabolomics	0.797633	0.00382617	1.03946	0.0558398	insig
MEDN228	D-Arabinose	Carbohydrate metabolomics	1.48397	3.32785e-08	1.60493	0.682509	insig
MEDN231	L-Fucose	Carbohydrate metabolomics	0.723808	0.00126241	1.5768	0.657004	insig
MEDN232	L-Rhamnose	Carbohydrate metabolomics	0.0747042	0.00252192	1.58287	0.662539	insig
MEDN240	L-Gulonic-Γ-Lactone	Carbohydrate metabolomics	0.0644254	0.287066	1.05512	0.0774035	insig
MEDN241	Vitamin D3	CoOthersEnzyme Factor & vitamin	2.0421	2.59125e-21	2.36737	1.24329	up
MEDN244	Orotic Acid	CoOthersEnzyme Factor & vitamin	0.556984	0.000104685	1.46326	0.54919	insig
MEDN245	Pantothenate	CoOthersEnzyme Factor & vitamin	1.27029	0.0525166	1.22846	0.296855	insig
MEDN273	1,3-Dimethyluric Acid	Organic Acid And Its Derivatives	0.952746	0.000142424	4.2485	2.08695	insig
MEDN274	1,7-Dimethyluric Acid	Organic Acid And Its Derivatives	0.931728	0.00015304	4.20101	2.07074	insig
MEDN279	2-Aminoethanesulfinic Acid	Organic Acid And Its Derivatives	0.404448	0.552641	0.937327	-0.0933758	insig
MEDN280	2-Aminoethanesulfonic Acid	Organic Acid And Its Derivatives	0.763608	0.401157	0.924411	-0.113394	insig
MEDN283	2-Hydroxybutanoic Acid	Organic Acid And Its Derivatives	0.884039	0.0171097	1.17445	0.231981	insig
MEDN284	2-Hydroxyisocaproic Acid	Organic Acid And Its Derivatives	0.247091	0.157703	1.15456	0.207339	insig
MEDN285	2-Methylsuccinic Acid	Organic Acid And Its Derivatives	0.261672	0.0407982	1.17893	0.237474	insig
MEDN286	3,4,5-Trimethoxycinnamic Acid	Organic Acid And Its Derivatives	0.432828	0.473514	1.39766	0.483015	insig
MEDN290	3-Hydroxy-3-Methyl Butyric Acid	Organic Acid And Its Derivatives	0.834388	0.0228873	1.13164	0.178413	insig
MEDN292	3-Hydroxybutyrate	Organic Acid And Its Derivatives	1.03678	0.000741013	1.72788	0.789006	insig
MEDN299	Adipic Acid	Organic Acid And Its Derivatives	1.22554	0.0710675	1.99189	0.99414	insig
MEDN300	Azelaic Acid	Organic Acid And Its Derivatives	1.46201	1.64674e-08	1.28848	0.365666	insig
MEDN301	Caffeic Acid	Organic Acid And Its Derivatives	1.05713	0.197343	1.28926	0.366539	insig
MEDN305	Creatine	Organic Acid And Its Derivatives	0.503603	0.0706248	0.858497	-0.220116	insig
MEDN311	Dodecanedioic Aicd	Organic Acid And Its Derivatives	0.670037	0.0103764	1.38209	0.466848	insig
MEDN314	Glutaric Acid	Organic Acid And Its Derivatives	0.457677	0.00874784	1.23902	0.309196	insig
MEDN316	Guanidinoethyl Sulfonate	Organic Acid And Its Derivatives	0.683081	0.084828	0.967506	-0.0476574	insig
MEDN321	Kinic Acid	Organic Acid And Its Derivatives	0.701509	4.18892e-07	1.60528	0.682821	insig
MEDN322	Kinurenine	Organic Acid And Its Derivatives	0.923339	0.000294976	1.16162	0.216139	insig
MEDN323	Kynurenic Acid	Organic Acid And Its Derivatives	1.04908	0.000840063	1.29461	0.372522	insig
MEDN324	L-3-Phenyllactic Acid	Organic Acid And Its Derivatives	0.672079	0.00296266	1.27973	0.35584	insig
MEDN325	L-Lactic Acid	Organic Acid And Its Derivatives	2.06375	3.32305e-15	1.61422	0.690836	insig
MEDN333	Malonicacid	Organic Acid And Its Derivatives	1.04896	0.000719015	1.73003	0.790799	insig
MEDN334	Mandelic Acid	Organic Acid And Its Derivatives	0.91779	0.00246447	1.44003	0.526094	insig
MEDN335	Methylmalonic Acid	Organic Acid And Its Derivatives	1.53006	5.08976e-08	1.39503	0.480296	insig
MEDN338	Phenyllactate (Pla)	Organic Acid And Its Derivatives	0.811414	0.000676017	1.31021	0.389795	insig
MEDN339	Phenylpyruvic Acid	Organic Acid And Its Derivatives	1.50165	0.00675373	1.28584	0.362711	insig
MEDN340	Pyrrole-2-Carboxylic Acid	Organic Acid And Its Derivatives	0.973584	0.00121539	1.32436	0.4053	insig
MEDN343	Shikimic Acid	Organic Acid And Its Derivatives	0.230966	0.177347	1.20794	0.272544	insig
MEDN344	Subericacid	Organic Acid And Its Derivatives	1.63874	1.70131e-10	1.30413	0.383084	insig
MEDN346	Vanillic Acid	Organic Acid And Its Derivatives	0.660185	0.0127059	1.52842	0.612042	insig
MEDN351	12-Hete	Lipids	0.99658	0.044884	6.30023	2.6554	insig
MEDN352	O-Phosphorylethanolamine	LipidsOthersPhospholipid	1.4871	6.84331e-07	0.509482	-0.972896	insig
MEDN356	Lysops 22:6	LipidsOthersPhospholipid	2.2007	1.28592e-13	1.50662	0.591319	insig
MEDN360	Lysopg 18:1	LipidsOthersPhospholipid	1.93251	9.52369e-12	1.3132	0.393083	insig
MEDN362	Lysope 18:1	LipidsOthersPhospholipid	0.854791	0.000200966	1.28826	0.365423	insig
MEDN364	Lysope 18:0	LipidsOthersPhospholipid	1.52356	4.87262e-09	1.30444	0.383433	insig
MEDN366	Lysope 16:0	LipidsOthersPhospholipid	1.13519	4.78466e-07	1.23019	0.298887	insig
MEDN368	Lysope 14:0	LipidsOthersPhospholipid	0.601216	0.25313	1.15184	0.203946	insig
MEDN370	Lysopa 18:0	LipidsOthersPhospholipid	2.08367	3.68067e-13	1.39381	0.479029	insig
MEDN372	Lysopa 16:0	LipidsOthersPhospholipid	2.33062	1.96833e-16	1.42121	0.507122	insig
MEDN374	9-Hpode	Lipids	0.49531	0.0399445	0.727768	-0.458449	insig
MEDN375	13-HOTrE [13S-hydroxy-9Z,11E,15Z-octadecatrienoic acid]	Oxidized lipid	0.845914	0.000456528	1.21153	0.276831	insig
MEDN376	9,10-DiHOME [(±)9,10-dihydroxy-12Z-octadecenoic acid]	Oxidized lipid	0.222174	0.235821	1.10155	0.139538	insig
MEDN378	γ-Linolenic Acid(C18:3N6)	Lipids_Fatty Acids	1.2663	0.000565114	1.52002	0.604091	insig
MEDN380	Palmitoleic Acid (C16:1)	Lipids_Fatty Acids	0.480501	0.164206	1.20149	0.264826	insig
MEDN381	Hexadecanoic Acid (C16:0)	Lipids_Fatty Acids	0.74648	0.0332326	1.08539	0.118208	insig
MEDN383	Linoleic Acid (C18:2N6C)	Lipids_Fatty Acids	0.134552	0.617965	0.969698	-0.0443933	insig
MEDN385	Dodecanoic Acid(C12:0)	Lipids_Fatty Acids	0.76169	0.0198167	1.45859	0.544579	insig
MEDN388	Elaidic Acid (C18:1N9T)	Lipids_Fatty Acids	1.09627	0.000803532	1.22734	0.295535	insig
MEDN390	EPA [5Z,8Z,11Z,14Z,17Z-eicosapentaenoic acid]	Oxidized lipid	1.27185	6.57449e-06	1.83327	0.874416	insig
MEDN391	DHA [4Z,7Z,10Z,13Z,16Z,19Z-docosahexaenoic acid]	Oxidized lipid	0.876734	0.0237646	1.28453	0.361239	insig
MEDN394	Cis-11,14-Eicosadienoic Acid (C20:2)	Lipids_Fatty Acids	0.787732	0.0142446	1.30806	0.38743	insig
MEDN395	Cis-11,14,17-Eicosatrienoic Acid (C20:3)	Lipids_Fatty Acids	1.85267	4.37274e-12	1.13429	0.181784	insig
MEDN399	Arachidic Acid(C20:0)	Lipids_Fatty Acids	0.758296	0.012739	1.24561	0.316851	insig
MEDN400	Α-Linolenic Acid(C18:3N3)	Lipids_Fatty Acids	1.16713	0.00270799	1.45419	0.540214	insig
MEDN403	Urocanic Acid	Organic Acid And Its Derivatives	0.52212	0.905524	0.920281	-0.119853	insig
MEDN406	3-(3-Hydroxyphenyl)Propionate Acid	Organic Acid And Its Derivatives	0.198461	0.687848	0.873284	-0.195477	insig
MEDN414	4-(Aminomethyl)-5-(Hydroxymethyl)-2-Methylpyridin-3-Ol	Others	0.0348039	0.863363	1.01071	0.0153694	insig
MEDN429	3-Hydroxyhippuric Acid	Organic Acid And Its Derivatives	0.347867	0.0130121	1.69736	0.763289	insig
MEDN430	Thiamine Triphosphate	CoOthersEnzyme Factor & vitamin	1.65277	5.62451e-11	1.12629	0.171584	insig
MEDN432	5-Hydroxyhexanoic Acid	Organic Acid And Its Derivatives	0.962404	0.000772626	1.50686	0.591548	insig
MEDN434	Β-Pseudouridine	Nucleotide metabolomics	0.232707	0.0783426	1.06401	0.0895055	insig
MEDN444	Hypoxanthine-9-β-D-Arabinofuranoside	Nucleotide metabolomics	0.0288381	0.100016	37.4825	5.22814	insig
MEDN470	Oxoadipic Acid	Organic Acid And Its Derivatives	1.29179	0.00037382	1.40814	0.493789	insig
MEDN472	1-Methyluric Acid	Organic Acid And Its Derivatives	1.21679	1.24274e-05	2.89007	1.53111	up
MEDN478	Aminomalonic Acid	Organic Acid And Its Derivatives	1.26693	1.79161e-06	1.36752	0.451567	insig
MEDN481	2,4-Dihydroxybenzoic Acid	Benzene and substituted derivatives	1.15286	3.80313e-05	2.15394	1.10698	up
MEDN483	3-Methyl-2-Oxobutanoic Acid	Organic Acid And Its Derivatives	1.12172	9.59245e-06	1.19894	0.261765	insig
MEDN486	Palmitaldehyde	Lipids_Fatty Acids	0.429757	0.492656	1.03943	0.0557862	insig
MEDN487	Allysine	Organic Acid And Its Derivatives	0.110809	0.142676	1.09627	0.132604	insig
MEDN490	Fumaric Acid	Amino Acid metabolomics	0.149226	0.485812	1.02341	0.0333838	insig
MEDN491	9-HOTrE [9S-hydroxy-10E,12Z,15Z-octadecatrienoic acid]	Oxidized lipid	0.692517	0.0378947	1.10113	0.138991	insig
MEDN494	8,15-Dihete	Lipids_Fatty Acids	0.34284	0.486737	1.10773	0.147607	insig
MEDN496	N-Acetylmethionine	Amino Acid metabolomics	0.670615	0.00415503	1.2593	0.332617	insig
MEDN498	Ribulose-5-Phosphate	Carbohydrate metabolomics	0.438992	5.90699e-07	1.21588	0.282002	insig
MEDN499	Argininosuccinic acid	Organic Acid And Its Derivatives	0.988118	2.81456e-08	1.2009	0.264119	insig
MEDN502	2-Deoxyribose 1-Phosphate	Carbohydrate metabolomics	0.3986	0.36568	0.968709	-0.0458649	insig
MEDN506	N-Acetylglucosamine 1-Phosphate	Carbohydrate metabolomics	0.454768	0.0175622	1.13503	0.182732	insig
MEDN523	Indolelactic acid	Indole And Its Derivatives	1.23673	1.27051e-10	1.555	0.636915	insig
MEDN524	Estrone	Hormones	1.01517	1.33144e-05	1.62084	0.696741	insig
MEDN528	(3-Methoxy-4-hydroxyphenyl)ethylene glycol sulfate	Organic Acid And Its Derivatives	0.83876	0.000339854	1.29993	0.378437	insig
MEDN530	Pimelic acid	Organic Acid And Its Derivatives	1.24796	5.30738e-06	1.55734	0.639088	insig
MEDN533	Xanthosine	Nucleotide metabolomics	0.518573	0.00737054	1.29177	0.369346	insig
MEDN538	UDP-glucose	Nucleotide metabolomics	1.43154	7.77773e-08	0.36397	-1.45811	down
MEDN540	1-Methylguanine	Nucleotide metabolomics	1.13864	1.716e-05	1.31326	0.393151	insig
MEDN551	Indoleacrylic acid	Organic Acid And Its Derivatives	0.0585766	0.514341	0.882684	-0.180032	insig
MEDN553	2-Methylbenzoic acid	Benzene and substituted derivatives	0.177781	0.0274098	3.28412	1.7155	insig
MEDN555	Hydroxyphenyllactic acid	Carbohydrate metabolomics	1.25997	3.77181e-05	1.27875	0.354738	insig
MEDN560	MARMESIN	Carbohydrate metabolomics	0.909322	0.00131112	1.58292	0.662587	insig
MEDN562	INDOLE-3-CARBINOL	Indole And Its Derivatives	0.617313	0.0389901	1.20897	0.273774	insig
MEDN563	DL-Benzylsuccinic acid	Lipids_Fatty Acids	0.670252	0.00489063	1.41156	0.497294	insig
MEDN568	2-Methylguanosine	Nucleotide metabolomics	0.191547	0.0209724	1.11581	0.158092	insig
MEDN569	DL-o-Tyrosine	Organic Acid And Its Derivatives	0.0157021	0.567256	0.967986	-0.0469415	insig
MEDN570	L-Erythrulose	Carbohydrate metabolomics	1.29342	0.00102943	1.26099	0.334554	insig
MEDN575	3-Hydroxypicolinic acid	Pyridine And Pyridine Derivatives	0.557732	0.810658	0.837297	-0.256188	insig
MEDN576	1,2,3-Trihydroxybenzene	Benzene and substituted derivatives	1.12699	0.0492095	2.26417	1.17898	up
MEDN579	N-lactoyl-phenylalanine	Organic Acid And Its Derivatives	0.413348	0.0863424	1.15209	0.204255	insig
MEDN587	N-Acetylvaline	Organic Acid And Its Derivatives	0.0542085	0.507507	1.09938	0.136693	insig
MEDN589	Cyclamic acid	Organic Acid And Its Derivatives	0.554448	0.0233323	2.91965	1.54579	insig
MEDN593	D-(+)-Malic acid	Amino Acid metabolomics	0.648292	1.46086e-09	1.71667	0.77961	insig
MEDN602	deoxyguanosine 5'-monophosphate (dGMP)	Nucleotide metabolomics	0.521876	0.219316	1.2444	0.315452	insig
MEDN604	Tetradecanedioic acid	Lipids_Fatty Acids	0.824961	0.0105718	1.3691	0.453228	insig
MEDN606	5-Methoxytryptophol	Indole And Its Derivatives	0.989741	7.52123e-05	1.20725	0.271722	insig
MEDN609	Uridine triphosphate (UTP)	Nucleotide metabolomics	0.871909	0.062893	1.43584	0.521892	insig
MEDN611	6β-hydroxytestosterone	Hormones	0.0612467	0.986856	0.999333	-0.000962297	insig
MEDN615	Carbamoyl phosphate	Organic Acid And Its Derivatives	1.14951	4.83564e-06	0.481157	-1.05542	down
MEDN620	Glucotropaeolin	Carbohydrate metabolomics	0.849021	0.00219506	0.915648	-0.127136	insig
MEDN621	Indoxylsulfuric acid	Organic Acid And Its Derivatives	0.861668	0.00326004	1.42016	0.506056	insig
MEDN622	Porphobilinogen	Organic Acid And Its Derivatives	0.430244	0.269647	1.06898	0.0962344	insig
MEDN623	Salicyluric acid	Benzene and substituted derivatives	0.638818	0.177484	1.2835	0.360088	insig
MEDN625	Formononetin	Carbohydrate metabolomics	0.894248	0.0256165	1.23119	0.30005	insig
MEDN632	N-Oleoyl Glycine	Organic Acid And Its Derivatives	2.92806	2.01355e-27	1.30231	0.381078	insig
MEDN647	Hydroquinone	Phenols And Its Derivatives	1.3137	2.49439e-05	1.89674	0.923522	insig
MEDN649	Anthranilic acid	Benzene and substituted derivatives	1.1527	9.12337e-06	1.29466	0.372576	insig
MEDN651	Succinic anhydride	Organic Acid And Its Derivatives	0.563373	0.161191	0.948061	-0.0769487	insig
MEDN654	3-Methylsalicylic acid	Organic Acid And Its Derivatives	1.16986	0.000305604	0.909418	-0.136985	insig
MEDN656	Indoleacetaldehyde	Indole And Its Derivatives	0.263034	0.0263666	1.31115	0.390837	insig
MEDN657	D-Xylulose 5-phosphate	Carbohydrate metabolomics	0.670324	1.23656e-09	0.707869	-0.498445	insig
MEDN658	Hexadecanedioic acid	Lipids_Fatty Acids	0.545419	0.0258172	1.36283	0.44661	insig
MEDN659	Pyrophosphate	Organic Acid And Its Derivatives	0.182674	0.749326	1.03299	0.0468246	insig
MEDN661	Vanillylmandelic acid	Benzene and substituted derivatives	1.36697	2.93003e-07	1.36636	0.450342	insig
MEDN662	Gamma-Glu-Leu	Organic Acid And Its Derivatives	1.13387	0.000282524	1.19767	0.260233	insig
MEDN675	Methylstearate	Fatty acyls	0.195536	0.0951471	1.07396	0.102947	insig
MEDN678	Ethylsalicylate	Organic Acid And Its Derivatives	1.20938	0.00383875	1.18269	0.242069	insig
MEDN679	Maltol	Heterocyclic compound	0.480853	0.00225723	1.44665	0.532715	insig
MEDN682	Octadecanamide	Fatty acyls	0.0173542	0.82536	1.00494	0.00710659	insig
MEDN694	2-nonanol	Alcohol	0.269161	0.619495	0.990663	-0.0135342	insig
MEDN698	1-Naphthol	Phenols And Its Derivatives	0.0747993	0.538818	1.01482	0.0212275	insig
MEDN704	Oxaloacetic acid	Organic Acid And Its Derivatives	0.220072	0.00557946	1.1803	0.239153	insig
MEDN706	Butyl??Acetate	Fatty acyls	0.338326	0.145745	1.30258	0.381369	insig
MEDN719	2-n-Pentylfuran	Heterocyclic compound	0.232793	0.509722	0.976126	-0.0348611	insig
MEDN725	Sorbic acid	Organic Acid And Its Derivatives	0.69842	0.0226041	1.07272	0.101271	insig
MEDN727	Methyl hexadecanoate	Fatty acyls	3.25198	1.09619e-33	1.38896	0.474004	insig
MEDN729	Phenoxyacetic acid	Benzene and substituted derivatives	0.345677	0.587	1.20772	0.272283	insig
MEDN731	4-tert-Octylphenol	Phenols And Its Derivatives	0.718922	0.0353841	0.970824	-0.0427177	insig
MEDN732	RICINOLEIC ACID	Fatty acyls	0.11106	0.671801	1.03628	0.0514111	insig
MEDN733	PHENYL-BETA-D-GLUCOPYRANOSIDE	Carbohydrate metabolomics	0.24001	0.494799	1.02614	0.0372224	insig
MEDN734	Cis-3-Hexenylacetate	Fatty acyls	0.407391	0.231153	0.980902	-0.0278196	insig
MEDN736	2-(Methylthio)ethanol	Alcohol	0.746039	0.303387	1.07511	0.104486	insig
MEDN741	Methanesulfonic acid	Others	0.0787483	0.000184585	3.2493	1.70013	insig
MEDN743	2-Nonanone	Ketones	0.248266	0.625208	0.992309	-0.011139	insig
MEDN745	Propylparaben	Benzoic Acid And Its Derivatives	0.259959	0.859093	1.01938	0.0276967	insig
MEDN747	2,4-Di-tert-butylphenol	Phenols And Its Derivatives	1.71634	2.27734e-07	0.916761	-0.125382	insig
MEDN748	Methylparaben	Benzoic Acid And Its Derivatives	1.25411	0.00172024	0.854887	-0.226194	insig
MEDN750	(±)12-HEPE [(±)-12-hydroxy-5Z,8Z,10E,14Z,17Z-eicosapentaenoic acid]	Oxidized lipid	1.03849	0.0253774	3.38241	1.75805	up
MEDN751	(±)12-HETE [(±)12-hydroxy-5Z,8Z,10E,14Z-eicosatetraenoic acid]	Oxidized lipid	1.09959	0.045609	9.06564	3.18041	up
MEDN758	(±)4-HDHA [(±)4-hydroxy-5E,7Z,10Z,13Z,16Z,19Z-docosahexaenoic acid]	Oxidized lipid	1.43345	0.00930203	2.81548	1.49338	up
MEDN760	(±)5-HETE [(±)5-hydroxy-6E,8Z,11Z,14Z-eicosatetraenoic acid]	Oxidized lipid	2.23895	0.407104	0.796192	-0.328813	insig
MEDN763	(±)9-HETE [(±)-9-hydroxy-5Z,7E,11Z,14Z-eicosatetraenoic acid]	Oxidized lipid	1.57776	0.0173211	2.02437	1.01748	up
MEDN765	11,12-EET [(±)11,(12)-epoxy-5Z,8Z,14Z-eicosatrienoic acid]	Oxidized lipid	1.82596	0.0446193	1.59276	0.671529	insig
MEDN767	12,13-EpOME [(±)12(13)epoxy-9Z-octadecenoic acid]	Oxidized lipid	0.749846	0.00816475	1.38551	0.470418	insig
MEDN768	13-oxoODE [13-oxo-9Z,11E-octadecadienoic acid]	Oxidized lipid	0.985109	1.12769e-05	1.19945	0.262372	insig
MEDN769	14(S)-HDHA [14S-hydroxy-4Z,7Z,10Z,12E,16Z,19Z-docosahexaenoic acid]	Oxidized lipid	1.54652	0.0422113	4.35383	2.12229	up
MEDN771	15-oxoETE [15-oxo-5Z,8Z,11Z,13E-eicosatetraenoic acid]	Oxidized lipid	2.13487	3.92788e-08	3.33905	1.73944	up
MEDN776	5(S),15(S)-DiHETE [5S,15S-dihydroxy-6E,8Z,10Z,13E-eicosatetraenoic acid]	Oxidized lipid	1.40792	0.139461	1.44147	0.527542	insig
MEDN783	9,10-EpOME [(±)9,10-epoxy-12Z-octadecenoic acid]	Oxidized lipid	1.33875	1.87621e-06	1.25097	0.323043	insig
MEDN784	9-oxoODE [9-oxo-10E,12Z-octadecadienoic acid]	Oxidized lipid	0.53993	0.0837901	1.02257	0.0322001	insig
MEDN785	LTB4 [5S,12R-dihydroxy-6Z,8E,10E,14Z-eicosatetraenoic acid]	Oxidized lipid	0.141395	0.248603	1.27646	0.352149	insig
MEDN795	PGF2α [9α,11α,15S-trihydroxy-prosta-5Z,13E-dien-1-oic acid]	Oxidized lipid	0.930965	1.54383e-05	1.43322	0.519257	insig
MEDN798	PGK1 [9,11-dioxo-15S-hydroxy-prost-13E-en-1-oic acid]	Oxidized lipid	1.36885	4.47266e-08	1.15958	0.213605	insig
MEDN806	Nα-Acetyl-L-glutamine	Carboxylic acids and derivatives	0.402215	0.000459576	1.44487	0.530942	insig
MEDN813	Xylose	Carbohydrate metabolomics	1.23642	1.9373e-05	1.43871	0.524774	insig
MEDN816	4-Hydroxyhippurate	Benzene and substituted derivatives	0.617348	0.176346	1.29555	0.37357	insig
MEDN818	N-acetyl-beta-alanine	Amino Acid metabolomics	0.985504	0.000236613	1.15053	0.202298	insig
MEDN821	Scyllo inositol	Alcohol	1.17397	3.25081e-05	1.47802	0.563666	insig
MEDN824	7-ketodeoxycholic acid	Lipids	0.525535	0.146552	1.37265	0.456965	insig
MEDN826	3-(3-Hydroxyphenyl)-3-hydroxypropanoic acid	Organic Acid And Its Derivatives	0.458897	0.00400964	1.85364	0.890363	insig
MEDN827	N-acetylornithine	Organic Acid And Its Derivatives	0.390187	0.071655	0.858392	-0.220292	insig
MEDN828	Nonadecylic acid	Lipids_Fatty Acids	2.42194	6.11892e-21	1.46971	0.555534	insig
MEDN843	N-Amidino-L-Aspartate	Amino Acid metabolomics	0.583575	0.114453	0.885705	-0.175102	insig
MEDN846	Lumichrome	Others	0.241911	0.973196	1.00194	0.00279937	insig
MEDN854	Mono-Methyl Glutarate	Organic Acid And Its Derivatives	1.6485	3.13862e-08	0.884978	-0.176287	insig
MEDN860	3,3',5'-Triiodothyronine	Organic Acid And Its Derivatives	1.6511	1.42021e-07	1.22893	0.297405	insig
MEDN861	1-Hydroxy-2-Naphthoate	Organic Acid And Its Derivatives	1.49439	0.571508	1.89301	0.92068	insig
MEDN862	Phenylpyruvate	Benzene and substituted derivatives	0.910476	0.00292997	1.23582	0.305473	insig
MEDP002	D-Homocysteine	Amino Acid metabolomics	0.975755	8.30378e-05	1.17819	0.236574	insig
MEDP006	Glycine	Amino Acid metabolomics	0.24504	0.650009	1.02559	0.0364562	insig
MEDP007	L-Cystine	Amino Acid metabolomics	1.55871	2.50754e-05	0.679531	-0.55739	insig
MEDP009	L-Tyrosine	Amino Acid metabolomics	0.709754	0.0604855	1.05386	0.0756782	insig
MEDP011	L-Lysine	Amino Acid metabolomics	0.622623	0.0198007	1.0888	0.122734	insig
MEDP012	L-Ornithine	Amino Acid metabolomics	1.57536	2.67667e-06	1.38676	0.471723	insig
MEDP013	L-Alanine	Amino Acid metabolomics	0.442575	0.00508209	1.1355	0.183331	insig
MEDP014	L-Aspartic Acid	Amino Acid metabolomics	0.697063	0.0124106	1.23524	0.304789	insig
MEDP017	L-Histidine	Amino Acid metabolomics	0.863307	0.000858146	1.10983	0.150337	insig
MEDP019	L-Leucine	Amino Acid metabolomics	0.198888	0.586522	0.989642	-0.0150213	insig
MEDP020	L-Methionine	Amino Acid metabolomics	0.0182119	0.796006	1.01074	0.0154093	insig
MEDP021	L-Phenylalanine	Amino Acid metabolomics	0.821688	0.0334685	1.01157	0.0165935	insig
MEDP022	L-Proline	Amino Acid metabolomics	1.36093	3.88273e-06	1.21934	0.286098	insig
MEDP025	L-Tryptophan	Amino Acid metabolomics	0.890416	0.00892927	1.04822	0.0679482	insig
MEDP026	L-Valine	Amino Acid metabolomics	0.686474	0.0426388	1.05152	0.0724783	insig
MEDP028	(5-L-Glutamyl)-L-Amino Acid	Amino Acid metabolomics	1.06465	5.04419e-05	1.23481	0.304292	insig
MEDP031	3-Chloro-L-Tyrosine	Amino Acid metabolomics	1.59203	5.25969e-08	0.854186	-0.227378	insig
MEDP032	3-Hydroxy-3-Methylpentane-1,5-Dioic Acid	Amino Acid metabolomics	0.837141	1.05167e-17	1.40708	0.492701	insig
MEDP034	3-N-Methyl-L-Histidine	Amino Acid metabolomics	0.594061	0.0507636	1.58783	0.667055	insig
MEDP036	5-Oxoproline	Amino Acid metabolomics	0.278252	0.871543	1.00612	0.00879717	insig
MEDP039	Betaine	Alkaloid	0.0193567	0.773694	1.00881	0.0126511	insig
MEDP044	Glutathione Reducedform	Amino Acid metabolomics	0.254296	0.172707	1.13876	0.187462	insig
MEDP058	L-Saccharopine	Amino Acid metabolomics	1.08151	1.40155e-05	0.813845	-0.297175	insig
MEDP059	L-Theanine	Amino Acid metabolomics	0.730207	0.0445121	0.878442	-0.18698	insig
MEDP061	N,N-Dimethylglycine	Amino Acid metabolomics	0.978377	0.000807219	1.11802	0.16094	insig
MEDP062	N6-Acetyl-L-Lysine	Amino Acid metabolomics	0.769522	0.00798406	1.10936	0.149722	insig
MEDP066	N-Acetyl-L-Tyrosine	Amino Acid metabolomics	0.0798539	0.452999	1.05029	0.07079	insig
MEDP067	N-Acetylmannosamine	Amino Acid metabolomics	0.428536	0.046855	1.13494	0.182618	insig
MEDP068	N-Acetylneuraminic Acid	Amino Acid metabolomics	0.598161	0.00318188	0.493627	-1.01851	insig
MEDP069	N-Acetylputrescine	Organic Acid And Its Derivatives	2.00544	8.27594e-13	0.90493	-0.144122	insig
MEDP071	N-Glycyl-L-Leucine	Amino Acid metabolomics	0.497198	4.48371e-05	1.48338	0.568893	insig
MEDP075	Nα-Acetyl-L-Arginine	Amino Acid metabolomics	2.70177	3.45132e-29	1.59661	0.67501	insig
MEDP077	Phenylacetyl-L-Glutamine	Amino Acid metabolomics	0.850814	0.24167	1.20127	0.264557	insig
MEDP078	Phe-Phe	Amino Acid metabolomics	0.541024	0.0386002	9.99808	3.32165	insig
MEDP079	S-(5-Adenosy)-L-Homocysteine	Amino Acid metabolomics	1.16566	2.95847e-05	1.25269	0.325029	insig
MEDP082	S-Sulfo-L-Cysteine	Amino Acid metabolomics	0.399922	0.0434146	0.856305	-0.223803	insig
MEDP084	Trimethylamine N-Oxide	Amino Acid metabolomics	1.22761	7.69579e-05	2.37597	1.24852	up
MEDP086	Urea	Amino Acid metabolomics	1.38069	7.72873e-06	1.1506	0.20239	insig
MEDP087	L-Alanyl-L-Lysine	Amino Acid metabolomics	1.43138	2.22407e-10	1.80838	0.854699	insig
MEDP089	N-Acetylhistamine	Organic Acid And Its Derivatives	0.426885	0.140796	1.13256	0.179587	insig
MEDP101	P-Coumaric Acid	Benzene and substituted derivatives	0.764584	0.0455189	1.0845	0.11703	insig
MEDP102	Syringic Acid	Benzene and substituted derivatives	0.0846986	0.425156	1.10183	0.139895	insig
MEDP111	3-(4-Hydroxyphenyl)-Propionic Acid	Benzene and substituted derivatives	0.00255529	0.769713	1.03511	0.049791	insig
MEDP112	4-Ethylbenzoic Acid	Benzene and substituted derivatives	1.46376	5.97045e-05	1.07817	0.108584	insig
MEDP114	Phthalic Acid	Benzene and substituted derivatives	2.39056	5.06188e-20	1.08475	0.117366	insig
MEDP115	1,4-Dihydro-1-Methyl-4-Oxo-3-Pyridinecarboxamide	Pyridine And Pyridine Derivatives	0.40601	0.126401	1.13584	0.183756	insig
MEDP118	4-Pyridoxic Acid	Pyridine And Pyridine Derivatives	0.596417	0.1196	1.56701	0.648011	insig
MEDP120	Theobromine	Nucleotide metabolomics	1.07156	0.0395516	1.88726	0.916296	insig
MEDP123	Acetylcholine Chloride	Cholines	0.313672	0.473416	0.963505	-0.0536361	insig
MEDP125	Choline	Cholines	0.993192	6.23671e-05	1.13704	0.185277	insig
MEDP127	Putrescine	Polyamine	2.58932	2.14373e-30	0.789115	-0.341693	insig
MEDP128	Diethanolamine	Polyamine	0.33616	0.173209	1.05926	0.083055	insig
MEDP129	Phenethylamine	Polyamine	2.15321	2.26212e-16	1.06963	0.0971155	insig
MEDP130	4-Nitrophenol	Phenols And Its Derivatives	0.394696	8.80302e-05	0.913265	-0.130895	insig
MEDP134	Inositol	Carbohydrate metabolomics	0.40429	1.35575e-05	0.899337	-0.153066	insig
MEDP135	Myoinositol	Carbohydrate metabolomics	0.402543	1.71679e-05	0.902651	-0.14776	insig
MEDP140	Vanillin	Phenols And Its Derivatives	0.540314	0.0535888	1.17984	0.23859	insig
MEDP145	1,7-Dimethylxanthine	Nucleotide metabolomics	0.887342	0.00018833	2.68273	1.4237	insig
MEDP147	1-Methylhistidine	Amino Acid metabolomics	0.630866	0.0043586	1.17022	0.226785	insig
MEDP150	2'-Deoxyinosine	Nucleotide metabolomics	0.0674184	0.0524663	1.28001	0.356152	insig
MEDP152	3'-Aenylic Acid	Nucleotide metabolomics	0.429056	0.133701	1.31372	0.393658	insig
MEDP153	3-Methylxanthine	Nucleotide metabolomics	0.882948	0.00165307	2.44487	1.28976	insig
MEDP154	5,6-Dihydro-5-Methyluracil	Nucleotide metabolomics	0.548266	0.0381874	1.08615	0.119222	insig
MEDP156	5-Methyluridine	Nucleotide metabolomics	1.18979	2.36147e-06	1.13526	0.183028	insig
MEDP157	7-Methylxanthine	Nucleotide metabolomics	0.484439	0.00408855	1.11874	0.16188	insig
MEDP158	8-Hydroxyguanosine	Nucleotide metabolomics	0.139141	0.094104	1.43836	0.52443	insig
MEDP159	Adenine	Nucleotide metabolomics	0.636278	0.100828	1.06635	0.0926869	insig
MEDP160	Adenosine	Nucleotide metabolomics	2.71159	1.28392e-11	0.563168	-0.828362	insig
MEDP164	Cytidine-5-Monophosphate	Nucleotide metabolomics	0.450853	0.233837	0.934762	-0.0973287	insig
MEDP171	Inosine	Nucleotide metabolomics	0.98062	0.089694	58.7867	5.87742	insig
MEDP174	Purine	Nucleotide metabolomics	1.533	9.40213e-09	1.09506	0.131015	insig
MEDP177	Thymine	Nucleotide metabolomics	0.711656	0.00689269	1.07651	0.106368	insig
MEDP178	Uracil	Nucleotide metabolomics	0.704497	0.000512927	1.21165	0.276974	insig
MEDP184	3,3',5-Triiodo-L-Thyronine	Hormones	2.11779	4.65115e-14	1.28174	0.358108	insig
MEDP186	L-Thyroxine	Hormones	1.69435	2.69409e-10	1.23044	0.299178	insig
MEDP188	Norepinephrine	Hormones	1.01105	9.07657e-06	1.16851	0.224666	insig
MEDP205	L-Carnitine	Camitine	0.405621	0.221891	0.953555	-0.0686119	insig
MEDP211	Melatonin	Tryptamines And Its Derivatives	0.157026	0.35016	1.07844	0.108951	insig
MEDP224	D-Fructose	Carbohydrate metabolomics	0.435232	6.31287e-12	0.852187	-0.230758	insig
MEDP227	D-Mannose	Carbohydrate metabolomics	0.430795	8.69601e-12	0.859333	-0.21871	insig
MEDP229	Lactose	Carbohydrate metabolomics	1.35983	3.65831e-05	0.686344	-0.542996	insig
MEDP230	Maltose	Carbohydrate metabolomics	0.420304	0.0290929	0.923548	-0.114741	insig
MEDP232	N-Acetyl-D-Glucosamine	Carbohydrate metabolomics	0.00570696	0.848334	1.01185	0.0169975	insig
MEDP233	Raffinose	Carbohydrate metabolomics	0.617109	0.0704502	0.824069	-0.279163	insig
MEDP236	Gluconic Acid	Carbohydrate metabolomics	1.67225	8.76505e-08	1.1218	0.165811	insig
MEDP239	L-Ascorbate	CoOthersEnzyme Factor & vitamin	0.206444	0.000245616	1.1954	0.257493	insig
MEDP242	Nicotinamide	CoOthersEnzyme Factor & vitamin	0.30146	0.533227	0.866474	-0.206772	insig
MEDP246	Nicotinic Acid	CoOthersEnzyme Factor & vitamin	0.852262	0.00044533	1.28458	0.361299	insig
MEDP247	Nicotinuric Acid	CoOthersEnzyme Factor & vitamin	0.57285	0.0272567	1.16604	0.221615	insig
MEDP249	Pantothenol	CoOthersEnzyme Factor & vitamin	0.316248	0.492665	0.801527	-0.319177	insig
MEDP250	Riboflavin	CoOthersEnzyme Factor & vitamin	0.172896	0.0364013	1.49591	0.581024	insig
MEDP251	Trigonelline	CoOthersEnzyme Factor & vitamin	0.948793	0.00585003	2.25593	1.17372	insig
MEDP270	3-Indolebutyric Acid	Indole And Its Derivatives	0.309813	0.152058	1.16073	0.215034	insig
MEDP271	3-Indolepropionic Acid	Indole And Its Derivatives	0.269298	0.71176	0.85524	-0.225598	insig
MEDP272	5-Hydroxyindole-3-Acetic Acid	Indole And Its Derivatives	0.487505	0.315782	1.18294	0.242378	insig
MEDP274	Indole-2-Carboxylic Acid	Indole And Its Derivatives	0.892088	0.00275415	1.26216	0.335895	insig
MEDP275	Indole-3-Acetic Acid	Indole And Its Derivatives	0.429882	0.360812	1.10922	0.14955	insig
MEDP276	Indole-3-Carboxaldehyde	Indole And Its Derivatives	0.217157	0.458724	1.08526	0.118045	insig
MEDP277	Methyl Indole-3-Acetate	Indole And Its Derivatives	0.213941	0.189497	1.22914	0.297644	insig
MEDP285	2,6-Diaminooimelic Acid	Organic Acid And Its Derivatives	0.171357	0.800483	0.983105	-0.0245821	insig
MEDP291	3,7-Dimethyluric Acid	Organic Acid And Its Derivatives	0.701461	0.000476647	3.5223	1.81652	insig
MEDP294	3-Methylcrotonyl Glycine	Organic Acid And Its Derivatives	0.123089	0.486372	1.07948	0.110338	insig
MEDP295	4-Acetamidobutyric Acid	Organic Acid And Its Derivatives	0.0507402	0.422909	1.04833	0.0680988	insig
MEDP296	4-Guanidinobutyric Acid	Organic Acid And Its Derivatives	0.213581	0.53909	0.970763	-0.0428083	insig
MEDP297	5-Aminovaleric Acid	Organic Acid And Its Derivatives	0.403089	0.25564	1.07756	0.107762	insig
MEDP298	6-Aminocaproic Acid	Organic Acid And Its Derivatives	0.218913	0.375785	1.0406	0.0574188	insig
MEDP299	7-Methyluric Acid	Organic Acid And Its Derivatives	0.414098	0.351196	1.01197	0.0171644	insig
MEDP303	Chlorogenic Acid	Organic Acid And Its Derivatives	0.562749	0.206673	1.44221	0.528285	insig
MEDP305	Creatinine	Organic Acid And Its Derivatives	1.3	2.25651e-07	1.23327	0.302484	insig
MEDP307	Dl-2-Aminooctanoic Acid	Organic Acid And Its Derivatives	0.620711	0.0226951	1.19637	0.258669	insig
MEDP310	D-Pipecolinic Acid	Organic Acid And Its Derivatives	0.727291	0.00740128	1.10156	0.139553	insig
MEDP313	Guanidineacetic Acid	Organic Acid And Its Derivatives	0.693103	0.159667	1.10729	0.14704	insig
MEDP315	Hippuric Acid	Organic Acid And Its Derivatives	0.557847	0.405588	1.15428	0.206992	insig
MEDP316	Homovanillic Acid	Organic Acid And Its Derivatives	0.737766	0.0492029	1.08049	0.111686	insig
MEDP317	Hydrocinnamic Acid	Organic Acid And Its Derivatives	1.04832	0.0050828	1.16487	0.220164	insig
MEDP321	L-Dihydroorotic Acid	Organic Acid And Its Derivatives	0.194006	2.0799e-12	1.26138	0.334998	insig
MEDP322	L-Homoserine	Organic Acid And Its Derivatives	0.542208	0.139948	1.06736	0.0940497	insig
MEDP325	Maleic Acid	Organic Acid And Its Derivatives	1.36604	1.11134e-06	1.30555	0.38466	insig
MEDP326	N'-Formylkynurenine	Organic Acid And Its Derivatives	0.346423	0.551539	0.886492	-0.17382	insig
MEDP328	P-Aminohippuric Acid	Organic Acid And Its Derivatives	0.497318	0.12027	1.1146	0.15652	insig
MEDP330	Sebacate	Organic Acid And Its Derivatives	1.23515	4.28504e-08	1.46847	0.554317	insig
MEDP332	Cinnamic Acid	Organic Acid And Its Derivatives	0.708246	0.00438917	1.09328	0.128661	insig
MEDP333	Uric Acid	Organic Acid And Its Derivatives	0.475398	0.00886041	1.1011	0.13894	insig
MEDP336	Lysopc 14:0	LipidsOthersPhospholipid	1.689	8.21726e-08	1.43318	0.519218	insig
MEDP338	Lysopc 16:0	LipidsOthersPhospholipid	2.67844	1.44925e-19	1.10592	0.145248	insig
MEDP340	Lysopc 16:1	LipidsOthersPhospholipid	1.70164	2.19059e-10	1.51234	0.596783	insig
MEDP342	Lysopc 18:0	LipidsOthersPhospholipid	2.15341	3.3572e-13	1.22959	0.298174	insig
MEDP344	Lysopc 18:1	LipidsOthersPhospholipid	1.78685	1.3255e-09	1.20463	0.268591	insig
MEDP346	Lysopc 18:2	LipidsOthersPhospholipid	1.24722	2.60193e-05	1.08592	0.118922	insig
MEDP350	Lysopc 20:1	LipidsOthersPhospholipid	1.71935	3.21582e-09	1.4924	0.577634	insig
MEDP352	Lysopc 20:2	LipidsOthersPhospholipid	1.52677	6.07048e-11	1.39315	0.478351	insig
MEDP361	4-Hydroxybenzaldehyde	Benzene and substituted derivatives	0.871199	0.0201068	1.096	0.132254	insig
MEDP365	Cotinine N-Oxide	Benzene and substituted derivatives	0.664958	0.178312	1.14692	0.19776	insig
MEDP368	Taurocholic Acid Sodium Salt Hydrate	Organic Acid And Its Derivatives	1.30259	4.46469e-05	1.04077	0.0576535	insig
MEDP370	2-(Formylamino)Benzoic Acid	Benzene and substituted derivatives	1.01909	0.000132862	1.10861	0.148747	insig
MEDP371	Acetaminophen Glucuronide	Carbohydrate metabolomics	1.21202	8.97354e-08	1.40033	0.485762	insig
MEDP372	Uridine 5-Monophosphate	Nucleotide metabolomics	1.38674	3.59016e-05	0.73747	-0.439344	insig
MEDP373	N-Acetylglycine	Amino Acid metabolomics	0.204518	0.458711	1.02123	0.0303089	insig
MEDP374	Cyclic Amp	Nucleotide metabolomics	0.707121	9.37959e-11	1.29237	0.37002	insig
MEDP378	N6-Succinyl Adenosine	Nucleotide metabolomics	1.07405	7.13335e-06	1.20294	0.266565	insig
MEDP380	2-(Dimethylamino)Guanosine	Nucleotide metabolomics	1.1297	5.7908e-07	1.22316	0.290617	insig
MEDP381	7-Methylguanine	Nucleotide metabolomics	0.902342	0.00117562	1.07067	0.0985096	insig
MEDP384	Isoxanthopterin	Pteridines and derivatives	1.19898	0.000365252	1.32902	0.41036	insig
MEDP386	N-Acetylthreonine	Amino Acid metabolomics	0.336472	0.253152	1.06961	0.0970901	insig
MEDP387	H-Homoarg-Oh	Amino Acid metabolomics	0.0381168	0.824508	0.983653	-0.0237782	insig
MEDP389	Pantetheine	CoOthersEnzyme Factor & vitamin	0.971804	0.00368006	0.957039	-0.063351	insig
MEDP391	Menaquinone	CoOthersEnzyme Factor & vitamin	0.727049	5.89636e-07	0.768348	-0.380168	insig
MEDP394	4-Hydroxyretinoic Acid	CoOthersEnzyme Factor & vitamin	0.955546	0.175027	1.11635	0.158795	insig
MEDP395	L-Pipecolic Acid	Amino Acid metabolomics	0.62193	0.252206	1.13972	0.188683	insig
MEDP401	5'-Deoxy-5'-(Methylthio) Adenosine	Nucleotide metabolomics	1.56989	6.94332e-08	0.672398	-0.572613	insig
MEDP404	Sarcosine	Amino Acid metabolomics	2.59923	3.36302e-30	0.801461	-0.319296	insig
MEDP405	3-Aminoisobutanoic Acid	Amino Acid metabolomics	0.605224	0.00498252	1.11489	0.156902	insig
MEDP408	11-Cis-Retinol	CoOthersEnzyme Factor & vitamin	2.11401	1.68949e-14	1.34309	0.425557	insig
MEDP410	Trans-Citridic Acid	Organic Acid And Its Derivatives	0.29195	0.503183	1.03089	0.0438869	insig
MEDP416	6-Phosphogluconic Acid Trisodium Salt	Carbohydrate metabolomics	0.406611	0.0656276	1.08267	0.1146	insig
MEDP428	Cholesterol	Lipids	1.60599	4.82843e-08	1.26467	0.338763	insig
MEDP429	Punicic Acid	Lipids_Fatty Acids	1.45274	2.85345e-07	1.08302	0.11506	insig
MEDP430	2-Aminoadipic Acid	Organic Acid And Its Derivatives	0.0397345	0.540776	0.957181	-0.0631365	insig
MEDP431	Hordenine	Benzene and substituted derivatives	0.781352	0.00275864	1.09972	0.137139	insig
MEDP434	Lysopc 17:0	LipidsOthersPhospholipid	2.20409	2.18389e-15	1.5232	0.607103	insig
MEDP435	6-Methylmercaptopurine	Nucleotide metabolomics	2.18436	9.85629e-16	1.05631	0.0790329	insig
MEDP437	Ergothioneine	Organic Acid And Its Derivatives	1.03587	0.000121437	1.59962	0.677733	insig
MEDP440	Methoxyindoleacetic Acid	Indole And Its Derivatives	0.611675	0.084349	1.05753	0.0806928	insig
MEDP442	Sn-Glycero-3-Phosphocholine	Cholines	0.039217	0.063538	1.17563	0.233431	insig
MEDP443	10-Formyl-Thf	Pteridines and derivatives	0.527914	0.315096	0.918821	-0.122143	insig
MEDP450	P-Aminobenzoate	Benzene and substituted derivatives	0.554959	0.0345211	1.17497	0.232629	insig
MEDP453	Indole	Indole And Its Derivatives	1.11475	0.000655555	1.09575	0.131917	insig
MEDP454	Isoquinoline	Benzene and substituted derivatives	0.917454	0.0101559	1.26907	0.343776	insig
MEDP456	Piperidine	Benzene and substituted derivatives	0.145686	0.488089	1.03432	0.0486888	insig
MEDP457	5-Aminolevulinate	Organic Acid And Its Derivatives	0.442566	0.0925912	1.07991	0.110913	insig
MEDP494	Lysopc 15:0	LipidsOthersPhospholipid	2.01378	5.8018e-11	1.455	0.54102	insig
MEDP498	Lysopc 18:3	LipidsOthersPhospholipid	2.42662	3.19011e-16	1.17159	0.228469	insig
MEDP507	2-Hydroxycinnamic acid	Benzene and substituted derivatives	0.672266	0.072418	1.07009	0.0977272	insig
MEDP509	trans-3-Indoleacrylic acid	Organic Acid And Its Derivatives	1.03252	0.00203978	1.10457	0.143488	insig
MEDP510	Acetyl-L-carnitine	Camitine	1.36792	3.20363e-07	1.14763	0.198661	insig
MEDP513	Hexadecanamide	Lipids_Fatty Acids	0.758428	0.0375054	1.33955	0.42175	insig
MEDP514	Thiamine	CoOthersEnzyme Factor & vitamin	0.193928	0.0970177	2.98904	1.57968	insig
MEDP517	Palmitoylcarnitine	Camitine	0.114306	0.127209	1.25825	0.331421	insig
MEDP518	DL-Stachydrine	Organic Acid And Its Derivatives	2.35555	6.66836e-27	1.59612	0.674572	insig
MEDP519	L-Norleucine	Amino Acid metabolomics	1.10911	0.000702501	1.10648	0.145979	insig
MEDP523	DL-Carnitine	Camitine	0.979656	0.00108995	0.857235	-0.222238	insig
MEDP525	N-Acetyl-L-alanine	Organic Acid And Its Derivatives	0.267033	0.386532	0.929246	-0.105867	insig
MEDP529	Indole-3-acetamide	Indole And Its Derivatives	0.668339	0.000713859	1.18906	0.249825	insig
MEDP535	Triethyl phosphate	Organic Acid And Its Derivatives	0.767483	0.502496	1.19605	0.258275	insig
MEDP537	PAF C-16	Lipids	2.18286	2.26229e-13	1.21393	0.279687	insig
MEDP540	7,8-dihydro-L-Biopterin	Pteridines and derivatives	0.297277	0.860523	1.01023	0.01469	insig
MEDP541	δ-Valerolactam	Pyridine And Pyridine Derivatives	0.256762	0.940728	1.01071	0.0153756	insig
MEDP545	2-Pyrrolidinone	Benzene and substituted derivatives	0.198084	0.569002	1.03442	0.0488272	insig
MEDP546	Oxindole	Indole And Its Derivatives	0.409254	0.00790864	1.40367	0.489206	insig
MEDP561	Farnesene	Lipids_Fatty Acids	0.995103	0.00511868	1.06176	0.0864612	insig
MEDP574	Oleamide	Lipids_Fatty Acids	0.652031	0.0947271	1.28817	0.36532	insig
MEDP575	5-amino-1-[3,4-dihydroxy-5-(hydroxymethyl)oxolan-2-yl]imidazole-4-carboxamide	Nucleotide metabolomics	0.783146	0.00775388	0.689056	-0.537306	insig
MEDP576	N1-Acetylspermine	Organic Acid And Its Derivatives	0.843585	0.00169555	1.4924	0.577637	insig
MEDP577	Isobutyryl carnitine	Camitine	0.416529	0.349878	1.06454	0.0902327	insig
MEDP578	alpha-Cadinene	Lipids_Fatty Acids	0.326797	0.45553	0.982255	-0.0258301	insig
MEDP579	gamma-Muurolene	Lipids_Fatty Acids	0.981602	0.00217011	1.09964	0.137031	insig
MEDP581	10E,12Z-Octadecadienoic acid	Lipids_Fatty Acids	0.183437	0.276077	0.87167	-0.198146	insig
MEDP583	Asp-Phe methyl ester	Organic Acid And Its Derivatives	1.3582	1.96509e-07	1.25839	0.331578	insig
MEDP584	Pterine	Pteridines and derivatives	0.639222	0.0519853	1.08366	0.115914	insig
MEDP585	Stearidonic Acid	Lipids_Fatty Acids	0.481507	0.125207	1.12839	0.174267	insig
MEDP586	N-Acetylphenylalanine	Organic Acid And Its Derivatives	0.0999448	0.524126	1.03593	0.0509247	insig
MEDP587	N-Alpha-acetyllysine	Organic Acid And Its Derivatives	1.10581	0.000357608	0.707799	-0.498589	insig
MEDP590	p-Mentha-1,3,8-triene	Lipids_Fatty Acids	0.473103	0.383674	0.915651	-0.12713	insig
MEDP594	Dihydroactinidiolide	Benzene and substituted derivatives	0.0216895	0.0144849	1.44701	0.533079	insig
MEDP598	2'-Hydroxy-5'-methylacetophenone	Benzene and substituted derivatives	1.43026	7.07955e-06	1.17637	0.234341	insig
MEDP602	1-(4-Methoxyphenyl)-2-propanone	Benzene and substituted derivatives	1.27081	2.6942e-06	1.30424	0.383205	insig
MEDP603	Cuminaldehyde	Lipids_Fatty Acids	0.804106	0.00144018	1.10567	0.144918	insig
MEDP606	2-(3,4-dimethoxyphenyl)ethanamine	Benzene and substituted derivatives	0.812511	0.0248679	1.0842	0.116634	insig
MEDP611	N-Acetyl-L-Histidine	Organic Acid And Its Derivatives	0.74045	0.002294	1.22186	0.289075	insig
MEDP612	(S)-2,3-epoxysqualene	Terpenoid	0.745246	0.0371629	1.31486	0.394907	insig
MEDP617	2-Furoylglycine	Amino Acid metabolomics	0.439716	0.0202316	1.41323	0.498993	insig
MEDP618	2-Methylbutyroylcarnitine	Lipids_Fatty Acids	0.522211	0.274638	1.08196	0.113641	insig
MEDP627	Isonicotinic acid	Organic Acid And Its Derivatives	0.567499	0.101438	1.04649	0.0655631	insig
MEDP631	Dimethyl fumarate	Lipids_Fatty Acids	2.23302	4.96813e-26	1.59411	0.67275	insig
MEDP632	beta-Cubebene	Lipids_Fatty Acids	0.330829	0.336988	0.975863	-0.0352492	insig
MEDP634	cis-gondoic acid	Lipids_Fatty Acids	0.401603	0.366364	1.1265	0.171853	insig
MEDP636	Furfural	Organic Acid And Its Derivatives	0.783902	1.03139e-05	1.08044	0.111613	insig
MEDP637	L-phenylalanyl-L-proline	Organic Acid And Its Derivatives	1.03912	2.64439e-05	1.28259	0.35906	insig
MEDP638	LysoPE(16:1(9Z)-0:0)	Lipids_Fatty Acids	0.389059	0.00452108	1.27789	0.353764	insig
MEDP642	3-Hydroxy-DL-kynurenine	Amino Acid metabolomics	0.150009	0.389625	1.06031	0.0844819	insig
MEDP652	Methyl cinnamate	Benzene and substituted derivatives	0.717068	0.0215589	1.03013	0.0428317	insig
MEDP653	Benzylcinnamate	Benzene and substituted derivatives	1.1374	7.31526e-06	1.10275	0.141112	insig
MEDP654	2-Phenylacetamide	Benzene and substituted derivatives	0.711485	0.41508	1.17094	0.227663	insig
MEDP656	Isoamyl butyrate	Fatty acyls	0.18724	5.78963e-13	1.27336	0.348643	insig
MEDP658	Ethyl dodecanoate	Fatty acyls	0.0353909	0.969992	1.00084	0.00120676	insig
MEDP659	Propylpropionate	Fatty acyls	0.464189	0.00110802	0.83585	-0.258684	insig
MEDP660	1,4-Xylene	Benzene and substituted derivatives	0.568996	0.0810799	0.970799	-0.0427548	insig
MEDP668	m-Cresol	Phenols And Its Derivatives	0.83048	0.012689	0.942463	-0.0854923	insig
MEDP670	2,6-Dimethylpyridine	Pyridine And Pyridine Derivatives	0.0544503	0.801735	0.987866	-0.0176131	insig
MEDP672	Cyclohexylamine	Amines	0.121581	0.648665	1.06521	0.0911374	insig
MEDP676	Butyl 3-methylbutanoate	Fatty acyls	0.166445	3.5181e-13	1.30575	0.384883	insig
MEDP677	Butylamine	Amines	0.740948	0.0105056	0.884283	-0.177421	insig
MEDP681	2,2,2-Trichloroethanol	Alcohol	0.186834	0.128053	0.961726	-0.0563023	insig
MEDP682	Hydroxyacetone	Ketones	0.203205	0.131644	1.09235	0.12743	insig
MEDP685	Methylcysteine	Amino Acid metabolomics	0.540442	0.168304	1.05584	0.0783964	insig
MEDP686	2-Acetylfuran	Heterocyclic compound	0.922664	0.000104995	1.091	0.125653	insig
MEDP688	Benzophenone	Benzene and substituted derivatives	1.59378	1.39475e-06	1.07195	0.100243	insig
MEDP689	TranexamicAcid	Organic Acid And Its Derivatives	0.538609	5.7895e-11	0.807793	-0.307943	insig
MEDP695	Methyl tetradecanoate	Fatty acyls	0.99543	0.000435521	0.951538	-0.0716673	insig
MEDP697	2,6-Di-tert-butyl-4-methylphenol	Benzene and substituted derivatives	1.32464	0.000148825	1.8557	0.891964	insig
MEDP701	(E)-2-Octen-1-ol	Alcohol	0.335245	0.11605	1.18965	0.250543	insig
MEDP707	2-Pentadecanone	Ketones	0.260762	0.295663	0.990834	-0.0132843	insig
MEDP709	Methyl dihydrojasmonate	Organic Acid And Its Derivatives	0.330166	0.458101	1.00579	0.00833072	insig
MEDP710	Hexyl butyrate	Fatty acyls	1.37631	9.71152e-06	0.884125	-0.177678	insig
MEDP716	cis-Citral	Aldehyde	1.13586	0.000193262	1.11696	0.159578	insig
MEDP718	Methylisobutyrate	Organic Acid And Its Derivatives	2.33881	3.10535e-18	1.56225	0.643629	insig
MEDP719	N-Nitrosodiethylamine	Polyamine	2.127	7.11638e-15	1.53617	0.619336	insig
MEDP724	3,5-Dinitrosalicylic acid	Organic Acid And Its Derivatives	0.265685	0.871029	1.00279	0.00401639	insig
MEDP729	Barbituric acid	Heterocyclic compound	0.240265	0.219002	1.14742	0.198395	insig
MEDP733	o-Xylene	Benzene and substituted derivatives	0.389349	0.143607	0.975864	-0.0352487	insig
MEDP736	1,3-diisopropylbenzene	Benzene and substituted derivatives	1.24147	6.11709e-06	1.05234	0.0736017	insig
MEDP738	carene	Heterocyclic compound	1.84313	1.68512e-09	1.07805	0.108429	insig
MEDP739	Hexyl??Acetate	Fatty acyls	0.147838	0.0649754	1.06901	0.0962705	insig
MEDP740	Farnesol	Alcohol	0.417822	0.280754	0.93394	-0.0985981	insig
MEDP742	Terpinolene	Terpenoid	0.808554	0.00168782	1.03319	0.0471083	insig
MEDP746	gamma-Terpinene	Terpenoid	0.380299	0.486431	0.895544	-0.159164	insig
MEDP747	alpha-Terpinene	Terpenoid	2.09242	8.57115e-18	1.09682	0.133321	insig
MEDP752	DL-Leucine	Amino Acid metabolomics	0.104635	0.774684	0.994902	-0.00737374	insig
MEDP759	Glycyrrhetinic acid	Terpenoid	0.18254	0.992712	0.993112	-0.00997108	insig
MEDP760	9-Fluorenone	Ketones	1.20966	9.53877e-06	1.16173	0.216271	insig
MEDP765	3-(Methylthio)-1-propanol	Alcohol	0.500485	0.0690197	0.969133	-0.0452339	insig
MEDP767	Aspirin	Organic Acid And Its Derivatives	0.441811	3.21987e-13	0.842868	-0.246621	insig
MEDP778	Ethyl butyrate	Fatty acyls	0.481983	0.00493764	0.836312	-0.257888	insig
MEDP781	2-Undecanone	Ketones	1.93812	1.06969e-13	1.43377	0.519812	insig
MEDP783	10-UNDECENOIC ACID	Fatty acyls	1.79997	1.21935e-21	1.30813	0.387509	insig
MEDP784	Undecanal	Aldehyde	1.93117	6.94337e-14	1.42475	0.510711	insig
MEDP789	2-Pentyl-3-phenyl-2-propenal	Aldehyde	0.00368952	0.757539	1.00239	0.0034446	insig
MEDP791	4-aminophenol	Phenols And Its Derivatives	0.601966	0.107328	1.09096	0.125593	insig
MEDP792	PYRROLIDINE	Heterocyclic compound	0.64681	0.0361336	1.08152	0.113065	insig
MEDP794	Octanal	Aldehyde	0.477167	0.0652534	1.23529	0.304848	insig
MEDP796	Pyrene	Benzene and substituted derivatives	0.58775	0.0179537	1.01573	0.022524	insig
MEDP799	(-)-Menthone	Ketones	0.707896	0.0397604	0.976385	-0.0344781	insig
MEDP811	2-(Methylthio)benzothiazole	Benzene and substituted derivatives	0.546128	0.754005	1.0128	0.0183555	insig
MEDP812	5-METHYLFURFURAL	Aldehyde	0.110159	3.43757e-10	1.29424	0.372106	insig
MEDP814	METHYL VALERATE	Fatty acyls	0.343357	0.627099	0.97626	-0.0346626	insig
MEDP815	N-ETHYLACETAMIDE	Amines	0.628956	2.4428e-08	0.774672	-0.368342	insig
MEDP817	PROPYL HEXANOATE	Fatty acyls	0.066497	1.8723e-18	1.47444	0.560165	insig
MEDP818	1-PENTADECANOL	Alcohol	0.0925823	0.463774	1.0139	0.0199191	insig
MEDP828	2-Methyl-1-propanol	Alcohol	0.197475	0.502825	1.04913	0.0691897	insig
MEDP831	1-Aminopropan-2-ol	Alcohol	1.06412	9.34267e-05	2.33385	1.22271	up
MEDP836	Dibutyl phthalate	Benzene and substituted derivatives	0.447089	0.146867	0.97956	-0.0297946	insig
MEDP839	Pulegone	Ketones	1.36669	6.28032e-05	1.13424	0.181722	insig
MEDP843	ETHYL ISOBUTYRATE	Fatty acyls	0.52731	6.81168e-05	0.786917	-0.345716	insig
MEDP844	FURFURYL ALCOHOL	Alcohol	0.386023	0.000517067	0.92423	-0.113676	insig
MEDP845	1-Phenylethanol	Benzene and substituted derivatives	1.17339	8.6217e-12	0.875672	-0.191538	insig
MEDP853	Choline chloride	Others	0.793968	0.000582212	1.13874	0.187436	insig
MEDP855	caprate (10:0)	Lipids	0.0250116	0.573947	1.00927	0.0133098	insig
MEDP856	Isobutyl decanoate	Fatty acyls	0.179381	0.90973	0.998136	-0.00269224	insig
MEDP859	glycylphenylalanine	Amino Acid metabolomics	0.237618	0.0109057	1.33948	0.421672	insig
MEDP860	L-Glutamic acid	Amino Acid metabolomics	0.373925	0.662609	0.968694	-0.0458868	insig
MEDP863	proline betaine	Organic Acid And Its Derivatives	0.0481187	0.828748	0.993679	-0.00914891	insig
MEDP865	Bisphenol propane	Benzene and substituted derivatives	0.319814	0.355142	1.02386	0.0340244	insig
MEDP867	Vitamin E	CoOthersEnzyme Factor & vitamin	0.258741	0.0844604	1.05752	0.0806794	insig
MEDP868	N-methylalanine	Amino Acid metabolomics	0.305357	0.183976	1.04664	0.065765	insig
MEDP871	sphinganine	Lipids	2.33318	1.0816e-12	0.678497	-0.559586	insig
MEDP872	Glycerophosphatidylcholine	Lipids	0.768114	0.459425	0.944191	-0.0828492	insig
MEDP873	3'-UMP	Nucleotide metabolomics	1.42076	9.93648e-09	1.2616	0.335254	insig
MEDP874	tryptophan betaine	Organic Acid And Its Derivatives	0.261219	0.190269	0.83911	-0.253068	insig
MEDP876	O-Succinyl-L-Homoserine	Amino Acid metabolomics	0.740391	0.0359576	1.16669	0.222425	insig
MEDP877	Cytidine 5'-Diphosphocholine	Nucleotide metabolomics	0.565197	6.33122e-05	0.803375	-0.315855	insig
MEDP878	N-Methyl-L-Glutamate	Amino Acid metabolomics	0.0155575	0.723255	0.97462	-0.037088	insig
MEDP879	N-Methyl-D-Aspartic Acid	Amino Acid metabolomics	0.141174	0.0184953	1.25551	0.328272	insig
MEDP881	Phosphocholine	Nucleotide metabolomics	2.56661	5.61109e-30	1.75944	0.81512	insig
MEDP883	2,4-Dihydroxypteridine	Pteridines and derivatives	0.450553	0.278876	1.04434	0.062594	insig
MEDP884	L-Methionine Sulfoximine	Organic Acid And Its Derivatives	0.504618	0.100665	0.899552	-0.152722	insig
MEDP888	2'-Deoxycytidine 5'-Diphosphate	Nucleotide metabolomics	0.725426	0.3085	0.946606	-0.0791633	insig
MEDP889	Cortisol	Lipids	1.58583	1.96202e-07	1.49172	0.576977	insig
MEDP891	L-Tryptophanamide	Amino Acid metabolomics	1.2183	0.000839233	2.23782	1.16209	up
MEDP904	Oleate	Lipids	0.679829	0.0848287	1.30094	0.379556	insig
