# Supplementary material for: Untargeted metabolomics for uncovering plasma biological markers of wet age-related macular degeneration
Source: Aging (Albany NY). 2021 May 4;13(10):13968–4000. doi: 10.18632/aging.203006 (PMC8202859; doi:10.18632/aging.203006)
Supplement: Supplementary File 3 [file aging-13-203006-s003.xlsx]

## Sheet: Sheet1
Supplementary File 3. Human and microbial metabolites.
Index	Compounds	Class	cpd_ID	type	Source
MEDN005	L-Threonine	Amino Acid metabolomics	C00188	Common	kegg
MEDN007	L-Arginine	Amino Acid metabolomics	C00062	Common	kegg
MEDN010	L-Citrulline	Amino Acid metabolomics	C00327	Common	kegg
MEDN011	L-Glutamic Acid	Amino Acid metabolomics	C00025	Common	kegg
MEDN013	L-Isoleucine	Amino Acid metabolomics	C00407	Common	kegg
MEDN017	L-Pyroglutamic Acid	Amino Acid metabolomics	C01879	Common	kegg
MEDN018	L-Serine	Amino Acid metabolomics	C00065	Common	kegg
MEDN030	5-Hydroxy-L-Tryptophan	Amino Acid metabolomics	C00643	Common	kegg
MEDN033	Asp-Phe	Amino Acid metabolomics	-	-	-
MEDN041	Hexanoyl Glycine	Amino Acid metabolomics	-	-	-
MEDN042	L-Asparagine Anhydrous	Amino Acid metabolomics	C00152	Common	kegg
MEDN043	L-Carnosine	Amino Acid metabolomics	C00386	Common	kegg
MEDN045	L-Cysteine	Amino Acid metabolomics	C00097	Common	kegg
MEDN046	L-Glutamine	Amino Acid metabolomics	C00064	Common	kegg
MEDN047	L-Homocitrulline	Amino Acid metabolomics	C02427	human	vmh
MEDN051	Methionine Sulfoxide	Amino Acid metabolomics	-	-	-
MEDN055	N-Acetyl-L-Glutamic Acid	Amino Acid metabolomics	C00624	Common	kegg
MEDN056	N-Acetyl-L-Leucine	Amino Acid metabolomics	C02710	-	-
MEDN060	N-Isovaleroylglycine	Amino Acid metabolomics	-	-	-
MEDN061	N-Phenylacetylglycine	Amino Acid metabolomics	C05598	Common	kegg
MEDN065	O-Phospho-L-Serine	Amino Acid metabolomics	C01005	Common	kegg
MEDN072	Trans-4-Hydroxy-L-Proline	Amino Acid metabolomics	C01157	Common	kegg
MEDN084	Benzoic Acid	Benzene and substituted derivatives	C00180	Common	kegg
MEDN086	Terephthalic Acid	Benzene and substituted derivatives	C06337	Common	kegg
MEDN087	(3,4-Dimethoxyphenyl) Acetic Acid	Benzene and substituted derivatives	-	-	-
MEDN090	2-Methoxybenzoic Acid	Benzoic Acid And Its Derivatives	-	-	-
MEDN092	3,4-Dihydroxybenzeneacetic Acid	Benzene and substituted derivatives	C01161	Common	kegg
MEDN093	3-Hydroxyanthranilic Acid	Benzoic Acid And Its Derivatives	C00632	Common	kegg
MEDN097	P–Hydroxyphenyl Acetic Acid	Benzene and substituted derivatives	C00642	Common	kegg
MEDN105	Taurocholic Acid	Bile Acids	C05122	Common	kegg
MEDN109	Hyodeoxycholic Acid	Bile Acids	-	-	-
MEDN110	Glycoursodeoxycholic Acid	Bile Acids	-	human	vmh
MEDN112	Glycocholic Acid	Bile Acids	C01921	Common	kegg
MEDN113	Glycochenodeoxycholic Acid	Bile Acids	C05466	Common	kegg
MEDN115	Chenodeoxycholic Acid	Bile Acids	C02528	Common	kegg
MEDN124	Protocatechuic Acid	Phenols And Its Derivatives	C00230	Common	kegg
MEDN139	1-Methylxanthine	Nucleotide metabolomics	-	-	-
MEDN140	2,6-Dihydroxypurine	Nucleotide metabolomics	C00385	Common	kegg
MEDN147	5-Methylcytosine	Nucleotide metabolomics	C02376	Common	kegg
MEDN163	Hypoxanthine	Nucleotide metabolomics	C00262	Common	kegg
MEDN168	Thymidine	Nucleotide metabolomics	C00214	Common	kegg
MEDN171	Uridine	Nucleotide metabolomics	C00299	Common	kegg
MEDN172	Β-Nicotinamide Mononucleotide	Nucleotide metabolomics	C00455	Common	kegg
MEDN178	Epinephrine	Hormones	C00788	Common	kegg
MEDN196	Pyrroloquinoline Quinone	Organic Acid And Its Derivatives	C00113	-	-
MEDN198	Citric Acid	Amino Acid metabolomics	C00158	Common	kegg
MEDN201	Succinic Acid	Amino Acid metabolomics	C00042	Common	kegg
MEDN202	A-Ketoglutaric Acid	Amino Acid metabolomics	C00026	Common	kegg
MEDN209	Tryptamine	Tryptamines And Its Derivatives	C00398	Common	kegg
MEDN213	D-Sorbitol	Carbohydrate metabolomics	C00794	Common	kegg
MEDN220	D-Glucose	Carbohydrate metabolomics	C00031	Common	kegg
MEDN224	D-Trehalose	Carbohydrate metabolomics	C01083	Common	kegg
MEDN226	D-Erythronolactone	Carbohydrate metabolomics	-	-	-
MEDN228	D-Arabinose	Carbohydrate metabolomics	-	bacterium	vmh
MEDN231	L-Fucose	Carbohydrate metabolomics	C01019	Common	kegg
MEDN232	L-Rhamnose	Carbohydrate metabolomics	C00507	Common	kegg
MEDN240	L-Gulonic-Γ-Lactone	Carbohydrate metabolomics	C01040	Common	kegg
MEDN241	Vitamin D3	CoOthersEnzyme Factor & vitamin	C05443	Common	kegg
MEDN244	Orotic Acid	CoOthersEnzyme Factor & vitamin	C00295	Common	kegg
MEDN245	Pantothenate	CoOthersEnzyme Factor & vitamin	C00864	Common	kegg
MEDN273	1,3-Dimethyluric Acid	Organic Acid And Its Derivatives	-	-	-
MEDN274	1,7-Dimethyluric Acid	Organic Acid And Its Derivatives	-	-	-
MEDN279	2-Aminoethanesulfinic Acid	Organic Acid And Its Derivatives	C00519	Common	kegg
MEDN280	2-Aminoethanesulfonic Acid	Organic Acid And Its Derivatives	C00245	Common	kegg
MEDN283	2-Hydroxybutanoic Acid	Organic Acid And Its Derivatives	C05984	Common	kegg
MEDN284	2-Hydroxyisocaproic Acid	Organic Acid And Its Derivatives	-	-	-
MEDN285	2-Methylsuccinic Acid	Organic Acid And Its Derivatives	C08645	-	-
MEDN286	3,4,5-Trimethoxycinnamic Acid	Organic Acid And Its Derivatives	-	-	-
MEDN290	3-Hydroxy-3-Methyl Butyric Acid	Organic Acid And Its Derivatives	-	-	-
MEDN292	3-Hydroxybutyrate	Organic Acid And Its Derivatives	C01089	Common	kegg
MEDN299	Adipic Acid	Organic Acid And Its Derivatives	C06104	Common	kegg
MEDN300	Azelaic Acid	Organic Acid And Its Derivatives	C08261	human	vmh
MEDN301	Caffeic Acid	Organic Acid And Its Derivatives	C01481	-	-
MEDN305	Creatine	Organic Acid And Its Derivatives	C00300	Common	kegg
MEDN311	Dodecanedioic Aicd	Organic Acid And Its Derivatives	C02678	-	-
MEDN314	Glutaric Acid	Organic Acid And Its Derivatives	C00489	Common	kegg
MEDN316	Guanidinoethyl Sulfonate	Organic Acid And Its Derivatives	C01959	Common	kegg
MEDN321	Kinic Acid	Organic Acid And Its Derivatives	C06746	-	-
MEDN322	Kinurenine	Organic Acid And Its Derivatives	C00328	Common	kegg
MEDN323	Kynurenic Acid	Organic Acid And Its Derivatives	C01717	Common	kegg
MEDN324	L-3-Phenyllactic Acid	Organic Acid And Its Derivatives	C05607	Common	kegg
MEDN325	L-Lactic Acid	Organic Acid And Its Derivatives	C00186	Common	kegg
MEDN333	Malonicacid	Organic Acid And Its Derivatives	C00383	Common	kegg
MEDN334	Mandelic Acid	Organic Acid And Its Derivatives	C01984	bacterium	kegg
MEDN335	Methylmalonic Acid	Organic Acid And Its Derivatives	C02170	Common	kegg
MEDN338	Phenyllactate (Pla)	Organic Acid And Its Derivatives	C01479	bacterium	kegg
MEDN339	Phenylpyruvic Acid	Organic Acid And Its Derivatives	C00166	Common	kegg
MEDN340	Pyrrole-2-Carboxylic Acid	Organic Acid And Its Derivatives	C05942	Common	kegg
MEDN343	Shikimic Acid	Organic Acid And Its Derivatives	C00493	Common	kegg
MEDN344	Subericacid	Organic Acid And Its Derivatives	C08278	human	vmh
MEDN346	Vanillic Acid	Organic Acid And Its Derivatives	C06672	bacterium	kegg
MEDN351	12-Hete	Lipids	-	human	vmh
MEDN352	O-Phosphorylethanolamine	LipidsOthersPhospholipid	C00346	Common	kegg
MEDN356	Lysops 22:6	LipidsOthersPhospholipid	-	-	-
MEDN360	Lysopg 18:1	LipidsOthersPhospholipid	-	-	-
MEDN362	Lysope 18:1	LipidsOthersPhospholipid	-	-	-
MEDN364	Lysope 18:0	LipidsOthersPhospholipid	-	-	-
MEDN366	Lysope 16:0	LipidsOthersPhospholipid	-	-	-
MEDN368	Lysope 14:0	LipidsOthersPhospholipid	-	-	-
MEDN370	Lysopa 18:0	LipidsOthersPhospholipid	-	-	-
MEDN372	Lysopa 16:0	LipidsOthersPhospholipid	C00416	Common	kegg
MEDN374	9-Hpode	Lipids	C14827	Common	kegg
MEDN375	13-HOTrE [13S-hydroxy-9Z,11E,15Z-octadecatrienoic acid]	Oxidized lipid	-	-	-
MEDN376	9,10-DiHOME [(±)9,10-dihydroxy-12Z-octadecenoic acid]	Oxidized lipid	C14828	Common	kegg
MEDN378	γ-Linolenic Acid(C18:3N6)	Lipids_Fatty Acids	C06426	Common	kegg
MEDN380	Palmitoleic Acid (C16:1)	Lipids_Fatty Acids	C08362	Common	kegg
MEDN381	Hexadecanoic Acid (C16:0)	Lipids_Fatty Acids	C00249	Common	kegg
MEDN383	Linoleic Acid (C18:2N6C)	Lipids_Fatty Acids	C01595	Common	kegg
MEDN385	Dodecanoic Acid(C12:0)	Lipids_Fatty Acids	C02679	Common	kegg
MEDN388	Elaidic Acid (C18:1N9T)	Lipids_Fatty Acids	C00712	Common	kegg
MEDN390	EPA [5Z,8Z,11Z,14Z,17Z-eicosapentaenoic acid]	Oxidized lipid	C06428	Common	kegg
MEDN391	DHA [4Z,7Z,10Z,13Z,16Z,19Z-docosahexaenoic acid]	Oxidized lipid	C06429	Common	kegg
MEDN394	Cis-11,14-Eicosadienoic Acid (C20:2)	Lipids_Fatty Acids	C16525	Common	kegg
MEDN395	Cis-11,14,17-Eicosatrienoic Acid (C20:3)	Lipids_Fatty Acids	C16522	Common	kegg
MEDN399	Arachidic Acid(C20:0)	Lipids_Fatty Acids	C06425	Common	kegg
MEDN400	Α-Linolenic Acid(C18:3N3)	Lipids_Fatty Acids	C06427	Common	kegg
MEDN403	Urocanic Acid	Organic Acid And Its Derivatives	C00785	Common	kegg
MEDN406	3-(3-Hydroxyphenyl)Propionate Acid	Organic Acid And Its Derivatives	C11457	Common	kegg
MEDN414	4-(Aminomethyl)-5-(Hydroxymethyl)-2-Methylpyridin-3-Ol	Others	C00534	Common	kegg
MEDN429	3-Hydroxyhippuric Acid	Organic Acid And Its Derivatives	-	-	-
MEDN430	Thiamine Triphosphate	CoOthersEnzyme Factor & vitamin	C03028	Common	kegg
MEDN432	5-Hydroxyhexanoic Acid	Organic Acid And Its Derivatives	-	human	vmh
MEDN434	Β-Pseudouridine	Nucleotide metabolomics	C02067	Common	kegg
MEDN444	Hypoxanthine-9-β-D-Arabinofuranoside	Nucleotide metabolomics	-	-	-
MEDN470	Oxoadipic Acid	Organic Acid And Its Derivatives	C00322	Common	kegg
MEDN472	1-Methyluric Acid	Organic Acid And Its Derivatives	C16359	Common	kegg
MEDN478	Aminomalonic Acid	Organic Acid And Its Derivatives	C00872	-	-
MEDN481	2,4-Dihydroxybenzoic Acid	Benzene and substituted derivatives	-	-	-
MEDN483	3-Methyl-2-Oxobutanoic Acid	Organic Acid And Its Derivatives	C00141	Common	kegg
MEDN486	Palmitaldehyde	Lipids_Fatty Acids	C00517	Common	kegg
MEDN487	Allysine	Organic Acid And Its Derivatives	C01475	Common	vmh
MEDN490	Fumaric Acid	Amino Acid metabolomics	C00122	Common	kegg
MEDN491	9-HOTrE [9S-hydroxy-10E,12Z,15Z-octadecatrienoic acid]	Oxidized lipid	-	-	-
MEDN494	8,15-Dihete	Lipids_Fatty Acids	-	-	-
MEDN496	N-Acetylmethionine	Amino Acid metabolomics	C02712	human	vmh
MEDN498	Ribulose-5-Phosphate	Carbohydrate metabolomics	C00117	Common	kegg
MEDN499	Argininosuccinic acid	Organic Acid And Its Derivatives	C03406	Common	kegg
MEDN502	2-Deoxyribose 1-Phosphate	Carbohydrate metabolomics	C00672	Common	kegg
MEDN506	N-Acetylglucosamine 1-Phosphate	Carbohydrate metabolomics	C04256	Common	vmh
MEDN523	Indolelactic acid	Indole And Its Derivatives	C02043	-	-
MEDN524	Estrone	Hormones	C00468	Common	kegg
MEDN528	(3-Methoxy-4-hydroxyphenyl)ethylene glycol sulfate	Organic Acid And Its Derivatives	-	-	-
MEDN530	Pimelic acid	Organic Acid And Its Derivatives	C02656	Common	kegg
MEDN533	Xanthosine	Nucleotide metabolomics	C01762	Common	kegg
MEDN538	UDP-glucose	Nucleotide metabolomics	C00029	Common	kegg
MEDN540	1-Methylguanine	Nucleotide metabolomics	C04152	-	-
MEDN551	Indoleacrylic acid	Organic Acid And Its Derivatives	-	-	-
MEDN553	2-Methylbenzoic acid	Benzene and substituted derivatives	C07215	Common	kegg
MEDN555	Hydroxyphenyllactic acid	Carbohydrate metabolomics	C03672	human	vmh
MEDN560	MARMESIN	Carbohydrate metabolomics	C09276	-	-
MEDN562	INDOLE-3-CARBINOL	Indole And Its Derivatives	-	-	-
MEDN563	DL-Benzylsuccinic acid	Lipids_Fatty Acids	C09816	Common	kegg
MEDN568	2-Methylguanosine	Nucleotide metabolomics	-	-	-
MEDN569	DL-o-Tyrosine	Organic Acid And Its Derivatives	-	-	-
MEDN570	L-Erythrulose	Carbohydrate metabolomics	C02045	human	vmh
MEDN575	3-Hydroxypicolinic acid	Pyridine And Pyridine Derivatives	C18620	-	-
MEDN576	1,2,3-Trihydroxybenzene	Benzene and substituted derivatives	C01108	bacterium	kegg
MEDN579	N-lactoyl-phenylalanine	Organic Acid And Its Derivatives	-	-	-
MEDN587	N-Acetylvaline	Organic Acid And Its Derivatives	-	-	-
MEDN589	Cyclamic acid	Organic Acid And Its Derivatives	C02824	bacterium	kegg
MEDN593	D-(+)-Malic acid	Amino Acid metabolomics	C00497	Common	kegg
MEDN602	deoxyguanosine 5'-monophosphate (dGMP)	Nucleotide metabolomics	C00362	Common	kegg
MEDN604	Tetradecanedioic acid	Lipids_Fatty Acids	C11002	-	-
MEDN606	5-Methoxytryptophol	Indole And Its Derivatives	-	human	vmh
MEDN609	Uridine triphosphate (UTP)	Nucleotide metabolomics	C00075	Common	kegg
MEDN611	6β-hydroxytestosterone	Hormones	C14497	human	vmh
MEDN615	Carbamoyl phosphate	Organic Acid And Its Derivatives	C00169	Common	kegg
MEDN620	Glucotropaeolin	Carbohydrate metabolomics	C02153	Common	kegg
MEDN621	Indoxylsulfuric acid	Organic Acid And Its Derivatives	-	-	-
MEDN622	Porphobilinogen	Organic Acid And Its Derivatives	C00931	Common	kegg
MEDN623	Salicyluric acid	Benzene and substituted derivatives	C07588	-	-
MEDN625	Formononetin	Carbohydrate metabolomics	C00858	bacterium	kegg
MEDN632	N-Oleoyl Glycine	Organic Acid And Its Derivatives	-	-	-
MEDN647	Hydroquinone	Phenols And Its Derivatives	C00530	Common	kegg
MEDN649	Anthranilic acid	Benzene and substituted derivatives	C00108	Common	kegg
MEDN651	Succinic anhydride	Organic Acid And Its Derivatives	C19524	-	-
MEDN654	3-Methylsalicylic acid	Organic Acid And Its Derivatives	C14088	bacterium	kegg
MEDN656	Indoleacetaldehyde	Indole And Its Derivatives	C00637	Common	kegg
MEDN657	D-Xylulose 5-phosphate	Carbohydrate metabolomics	C00231	Common	kegg
MEDN658	Hexadecanedioic acid	Lipids_Fatty Acids	C19615	Common	kegg
MEDN659	Pyrophosphate	Organic Acid And Its Derivatives	C00013	Common	kegg
MEDN661	Vanillylmandelic acid	Benzene and substituted derivatives	C05584	Common	kegg
MEDN662	Gamma-Glu-Leu	Organic Acid And Its Derivatives	-	-	-
MEDN675	Methylstearate	Fatty acyls	-	-	-
MEDN678	Ethylsalicylate	Organic Acid And Its Derivatives	-	-	-
MEDN679	Maltol	Heterocyclic compound	C11918	bacterium	kegg
MEDN682	Octadecanamide	Fatty acyls	C13846	-	-
MEDN694	2-nonanol	Alcohol	-	-	-
MEDN698	1-Naphthol	Phenols And Its Derivatives	C11714	human	kegg
MEDN704	Oxaloacetic acid	Organic Acid And Its Derivatives	C00036	Common	kegg
MEDN706	Butyl??Acetate	Fatty acyls	C12304	-	-
MEDN719	2-n-Pentylfuran	Heterocyclic compound	-	-	-
MEDN725	Sorbic acid	Organic Acid And Its Derivatives	-	-	-
MEDN727	Methyl hexadecanoate	Fatty acyls	C16995	-	-
MEDN729	Phenoxyacetic acid	Benzene and substituted derivatives	C02181	-	-
MEDN731	4-tert-Octylphenol	Phenols And Its Derivatives	C14205	-	-
MEDN732	RICINOLEIC ACID	Fatty acyls	C08365	-	-
MEDN733	PHENYL-BETA-D-GLUCOPYRANOSIDE	Carbohydrate metabolomics	C11611	-	-
MEDN734	Cis-3-Hexenylacetate	Fatty acyls	C19757	Common	kegg
MEDN736	2-(Methylthio)ethanol	Alcohol	-	-	-
MEDN741	Methanesulfonic acid	Others	C11145	Common	kegg
MEDN743	2-Nonanone	Ketones	-	-	-
MEDN745	Propylparaben	Benzoic Acid And Its Derivatives	-	-	-
MEDN747	2,4-Di-tert-butylphenol	Phenols And Its Derivatives	-	-	-
MEDN748	Methylparaben	Benzoic Acid And Its Derivatives	-	-	-
MEDN750	(±)12-HEPE [(±)-12-hydroxy-5Z,8Z,10E,14Z,17Z-eicosapentaenoic acid]	Oxidized lipid	-	-	-
MEDN751	(±)12-HETE [(±)12-hydroxy-5Z,8Z,10E,14Z-eicosatetraenoic acid]	Oxidized lipid	-	-	-
MEDN758	(±)4-HDHA [(±)4-hydroxy-5E,7Z,10Z,13Z,16Z,19Z-docosahexaenoic acid]	Oxidized lipid	-	-	-
MEDN760	(±)5-HETE [(±)5-hydroxy-6E,8Z,11Z,14Z-eicosatetraenoic acid]	Oxidized lipid	-	-	-
MEDN763	(±)9-HETE [(±)-9-hydroxy-5Z,7E,11Z,14Z-eicosatetraenoic acid]	Oxidized lipid	-	-	-
MEDN765	11,12-EET [(±)11,(12)-epoxy-5Z,8Z,14Z-eicosatrienoic acid]	Oxidized lipid	-	-	-
MEDN767	12,13-EpOME [(±)12(13)epoxy-9Z-octadecenoic acid]	Oxidized lipid	C14826	Common	kegg
MEDN768	13-oxoODE [13-oxo-9Z,11E-octadecadienoic acid]	Oxidized lipid	C14765	Common	kegg
MEDN769	14(S)-HDHA [14S-hydroxy-4Z,7Z,10Z,12E,16Z,19Z-docosahexaenoic acid]	Oxidized lipid	-	-	-
MEDN771	15-oxoETE [15-oxo-5Z,8Z,11Z,13E-eicosatetraenoic acid]	Oxidized lipid	C04577	Common	kegg
MEDN776	5(S),15(S)-DiHETE [5S,15S-dihydroxy-6E,8Z,10Z,13E-eicosatetraenoic acid]	Oxidized lipid	-	-	-
MEDN783	9,10-EpOME [(±)9,10-epoxy-12Z-octadecenoic acid]	Oxidized lipid	-	-	-
MEDN784	9-oxoODE [9-oxo-10E,12Z-octadecadienoic acid]	Oxidized lipid	C14766	Common	kegg
MEDN785	LTB4 [5S,12R-dihydroxy-6Z,8E,10E,14Z-eicosatetraenoic acid]	Oxidized lipid	C02165	Common	kegg
MEDN795	PGF2α [9α,11α,15S-trihydroxy-prosta-5Z,13E-dien-1-oic acid]	Oxidized lipid	-	-	-
MEDN798	PGK1 [9,11-dioxo-15S-hydroxy-prost-13E-en-1-oic acid]	Oxidized lipid	-	-	-
MEDN806	Nα-Acetyl-L-glutamine	Carboxylic acids and derivatives	-	-	-
MEDN813	Xylose	Carbohydrate metabolomics	C01394	-	-
MEDN816	4-Hydroxyhippurate	Benzene and substituted derivatives	-	-	-
MEDN818	N-acetyl-beta-alanine	Amino Acid metabolomics	C01073	Common	kegg
MEDN821	Scyllo inositol	Alcohol	C06153	Common	kegg
MEDN824	7-ketodeoxycholic acid	Lipids	-	-	-
MEDN826	3-(3-Hydroxyphenyl)-3-hydroxypropanoic acid	Organic Acid And Its Derivatives	-	-	-
MEDN827	N-acetylornithine	Organic Acid And Its Derivatives	C00437	Common	kegg
MEDN828	Nonadecylic acid	Lipids_Fatty Acids	C16535	human	vmh
MEDN843	N-Amidino-L-Aspartate	Amino Acid metabolomics	C03139	-	-
MEDN846	Lumichrome	Others	C01727	Common	kegg
MEDN854	Mono-Methyl Glutarate	Organic Acid And Its Derivatives	-	-	-
MEDN860	3,3',5'-Triiodothyronine	Organic Acid And Its Derivatives	C07639	human	kegg
MEDN861	1-Hydroxy-2-Naphthoate	Organic Acid And Its Derivatives	C03203	Common	kegg
MEDN862	Phenylpyruvate	Benzene and substituted derivatives	C00166	Common	kegg
MEDP002	D-Homocysteine	Amino Acid metabolomics	C00155	Common	kegg
MEDP006	Glycine	Amino Acid metabolomics	C00037	Common	kegg
MEDP007	L-Cystine	Amino Acid metabolomics	C00491	Common	kegg
MEDP009	L-Tyrosine	Amino Acid metabolomics	C00082	Common	kegg
MEDP011	L-Lysine	Amino Acid metabolomics	C00047	Common	kegg
MEDP012	L-Ornithine	Amino Acid metabolomics	C00077	Common	kegg
MEDP013	L-Alanine	Amino Acid metabolomics	C00041	Common	kegg
MEDP014	L-Aspartic Acid	Amino Acid metabolomics	C00049	Common	kegg
MEDP017	L-Histidine	Amino Acid metabolomics	C00135	Common	kegg
MEDP019	L-Leucine	Amino Acid metabolomics	C00123	Common	kegg
MEDP020	L-Methionine	Amino Acid metabolomics	C00073	Common	kegg
MEDP021	L-Phenylalanine	Amino Acid metabolomics	C00079	Common	kegg
MEDP022	L-Proline	Amino Acid metabolomics	C00148	Common	kegg
MEDP025	L-Tryptophan	Amino Acid metabolomics	C00078	Common	kegg
MEDP026	L-Valine	Amino Acid metabolomics	C00183	Common	kegg
MEDP028	(5-L-Glutamyl)-L-Amino Acid	Amino Acid metabolomics	C03740	Common	kegg
MEDP031	3-Chloro-L-Tyrosine	Amino Acid metabolomics	-	-	-
MEDP032	3-Hydroxy-3-Methylpentane-1,5-Dioic Acid	Amino Acid metabolomics	C03761	-	-
MEDP034	3-N-Methyl-L-Histidine	Amino Acid metabolomics	C01152	Common	kegg
MEDP036	5-Oxoproline	Amino Acid metabolomics	C02237	Common	kegg
MEDP039	Betaine	Alkaloid	C00719	Common	kegg
MEDP044	Glutathione Reducedform	Amino Acid metabolomics	C00051	Common	kegg
MEDP058	L-Saccharopine	Amino Acid metabolomics	C00449	Common	kegg
MEDP059	L-Theanine	Amino Acid metabolomics	-	-	-
MEDP061	N,N-Dimethylglycine	Amino Acid metabolomics	C01026	Common	kegg
MEDP062	N6-Acetyl-L-Lysine	Amino Acid metabolomics	C02727	Common	kegg
MEDP066	N-Acetyl-L-Tyrosine	Amino Acid metabolomics	C01657	-	-
MEDP067	N-Acetylmannosamine	Amino Acid metabolomics	C00645	Common	kegg
MEDP068	N-Acetylneuraminic Acid	Amino Acid metabolomics	C19910	Common	vmh
MEDP069	N-Acetylputrescine	Organic Acid And Its Derivatives	C02714	Common	kegg
MEDP071	N-Glycyl-L-Leucine	Amino Acid metabolomics	C02155	Common	vmh
MEDP075	Nα-Acetyl-L-Arginine	Amino Acid metabolomics	-	-	-
MEDP077	Phenylacetyl-L-Glutamine	Amino Acid metabolomics	C05595	Common	kegg
MEDP078	Phe-Phe	Amino Acid metabolomics	-	-	-
MEDP079	S-(5-Adenosy)-L-Homocysteine	Amino Acid metabolomics	C00021	Common	kegg
MEDP082	S-Sulfo-L-Cysteine	Amino Acid metabolomics	C05824	Common	kegg
MEDP084	Trimethylamine N-Oxide	Amino Acid metabolomics	C01104	Common	kegg
MEDP086	Urea	Amino Acid metabolomics	C00086	Common	kegg
MEDP087	L-Alanyl-L-Lysine	Amino Acid metabolomics	-	-	-
MEDP089	N-Acetylhistamine	Organic Acid And Its Derivatives	C05135	Common	kegg
MEDP101	P-Coumaric Acid	Benzene and substituted derivatives	C00811	Common	kegg
MEDP102	Syringic Acid	Benzene and substituted derivatives	C10833	bacterium	kegg
MEDP111	3-(4-Hydroxyphenyl)-Propionic Acid	Benzene and substituted derivatives	C01744	bacterium	vmh
MEDP112	4-Ethylbenzoic Acid	Benzene and substituted derivatives	-	-	-
MEDP114	Phthalic Acid	Benzene and substituted derivatives	C01606	Common	kegg
MEDP115	1,4-Dihydro-1-Methyl-4-Oxo-3-Pyridinecarboxamide	Pyridine And Pyridine Derivatives	C05843	Common	kegg
MEDP118	4-Pyridoxic Acid	Pyridine And Pyridine Derivatives	C00847	Common	kegg
MEDP120	Theobromine	Nucleotide metabolomics	C07480	Common	kegg
MEDP123	Acetylcholine Chloride	Cholines	-	-	-
MEDP125	Choline	Cholines	C00114	Common	kegg
MEDP127	Putrescine	Polyamine	C00134	Common	kegg
MEDP128	Diethanolamine	Polyamine	C06772	Common	kegg
MEDP129	Phenethylamine	Polyamine	C05332	Common	kegg
MEDP130	4-Nitrophenol	Phenols And Its Derivatives	C00870	bacterium	kegg
MEDP134	Inositol	Carbohydrate metabolomics	-	-	-
MEDP135	Myoinositol	Carbohydrate metabolomics	C00137	Common	kegg
MEDP140	Vanillin	Phenols And Its Derivatives	C00755	Common	kegg
MEDP145	1,7-Dimethylxanthine	Nucleotide metabolomics	C13747	Common	kegg
MEDP147	1-Methylhistidine	Amino Acid metabolomics	C01152	Common	kegg
MEDP150	2'-Deoxyinosine	Nucleotide metabolomics	C05512	Common	kegg
MEDP152	3'-Aenylic Acid	Nucleotide metabolomics	C01367	Common	kegg
MEDP153	3-Methylxanthine	Nucleotide metabolomics	C16357	Common	kegg
MEDP154	5,6-Dihydro-5-Methyluracil	Nucleotide metabolomics	C00906	Common	vmh
MEDP156	5-Methyluridine	Nucleotide metabolomics	-	-	-
MEDP157	7-Methylxanthine	Nucleotide metabolomics	C16353	Common	kegg
MEDP158	8-Hydroxyguanosine	Nucleotide metabolomics	-	-	-
MEDP159	Adenine	Nucleotide metabolomics	C00147	Common	kegg
MEDP160	Adenosine	Nucleotide metabolomics	C00212	Common	kegg
MEDP164	Cytidine-5-Monophosphate	Nucleotide metabolomics	C00055	Common	kegg
MEDP171	Inosine	Nucleotide metabolomics	C00294	Common	kegg
MEDP174	Purine	Nucleotide metabolomics	C15587	-	-
MEDP177	Thymine	Nucleotide metabolomics	C00178	Common	kegg
MEDP178	Uracil	Nucleotide metabolomics	C00106	Common	kegg
MEDP184	3,3',5-Triiodo-L-Thyronine	Hormones	C02465	Common	kegg
MEDP186	L-Thyroxine	Hormones	C01829	Common	kegg
MEDP188	Norepinephrine	Hormones	C00547	Common	kegg
MEDP205	L-Carnitine	Camitine	C00318	human	kegg
MEDP211	Melatonin	Tryptamines And Its Derivatives	C01598	Common	kegg
MEDP224	D-Fructose	Carbohydrate metabolomics	C10906	-	-
MEDP227	D-Mannose	Carbohydrate metabolomics	C00159	Common	kegg
MEDP229	Lactose	Carbohydrate metabolomics	C00243	Common	kegg
MEDP230	Maltose	Carbohydrate metabolomics	C00208	Common	kegg
MEDP232	N-Acetyl-D-Glucosamine	Carbohydrate metabolomics	C00140	Common	kegg
MEDP233	Raffinose	Carbohydrate metabolomics	C00492	Common	kegg
MEDP236	Gluconic Acid	Carbohydrate metabolomics	C00257	Common	kegg
MEDP239	L-Ascorbate	CoOthersEnzyme Factor & vitamin	C00072	Common	kegg
MEDP242	Nicotinamide	CoOthersEnzyme Factor & vitamin	C00153	Common	kegg
MEDP246	Nicotinic Acid	CoOthersEnzyme Factor & vitamin	C00253	Common	kegg
MEDP247	Nicotinuric Acid	CoOthersEnzyme Factor & vitamin	C05380	Common	kegg
MEDP249	Pantothenol	CoOthersEnzyme Factor & vitamin	C05944	Common	kegg
MEDP250	Riboflavin	CoOthersEnzyme Factor & vitamin	C00255	Common	kegg
MEDP251	Trigonelline	CoOthersEnzyme Factor & vitamin	C01004	Common	kegg
MEDP270	3-Indolebutyric Acid	Indole And Its Derivatives	C11284	-	-
MEDP271	3-Indolepropionic Acid	Indole And Its Derivatives	-	-	-
MEDP272	5-Hydroxyindole-3-Acetic Acid	Indole And Its Derivatives	C05635	Common	kegg
MEDP274	Indole-2-Carboxylic Acid	Indole And Its Derivatives	-	-	-
MEDP275	Indole-3-Acetic Acid	Indole And Its Derivatives	C00954	Common	kegg
MEDP276	Indole-3-Carboxaldehyde	Indole And Its Derivatives	C08493	-	-
MEDP277	Methyl Indole-3-Acetate	Indole And Its Derivatives	-	-	-
MEDP285	2,6-Diaminooimelic Acid	Organic Acid And Its Derivatives	C00666	Common	kegg
MEDP291	3,7-Dimethyluric Acid	Organic Acid And Its Derivatives	-	-	-
MEDP294	3-Methylcrotonyl Glycine	Organic Acid And Its Derivatives	-	-	-
MEDP295	4-Acetamidobutyric Acid	Organic Acid And Its Derivatives	C02946	Common	kegg
MEDP296	4-Guanidinobutyric Acid	Organic Acid And Its Derivatives	C01035	Common	kegg
MEDP297	5-Aminovaleric Acid	Organic Acid And Its Derivatives	C00431	Common	kegg
MEDP298	6-Aminocaproic Acid	Organic Acid And Its Derivatives	C02378	Common	kegg
MEDP299	7-Methyluric Acid	Organic Acid And Its Derivatives	C16355	Common	kegg
MEDP303	Chlorogenic Acid	Organic Acid And Its Derivatives	C00852	bacterium	kegg
MEDP305	Creatinine	Organic Acid And Its Derivatives	C00791	Common	kegg
MEDP307	Dl-2-Aminooctanoic Acid	Organic Acid And Its Derivatives	-	-	-
MEDP310	D-Pipecolinic Acid	Organic Acid And Its Derivatives	-	-	-
MEDP313	Guanidineacetic Acid	Organic Acid And Its Derivatives	C00581	Common	kegg
MEDP315	Hippuric Acid	Organic Acid And Its Derivatives	C01586	Common	kegg
MEDP316	Homovanillic Acid	Organic Acid And Its Derivatives	C05582	Common	kegg
MEDP317	Hydrocinnamic Acid	Organic Acid And Its Derivatives	C05629	Common	kegg
MEDP321	L-Dihydroorotic Acid	Organic Acid And Its Derivatives	C00337	Common	kegg
MEDP322	L-Homoserine	Organic Acid And Its Derivatives	C00263	Common	kegg
MEDP325	Maleic Acid	Organic Acid And Its Derivatives	C01384	Common	kegg
MEDP326	N'-Formylkynurenine	Organic Acid And Its Derivatives	C02406	-	-
MEDP328	P-Aminohippuric Acid	Organic Acid And Its Derivatives	-	-	-
MEDP330	Sebacate	Organic Acid And Its Derivatives	C08277	human	vmh
MEDP332	Cinnamic Acid	Organic Acid And Its Derivatives	C00423	Common	kegg
MEDP333	Uric Acid	Organic Acid And Its Derivatives	C00366	Common	kegg
MEDP336	Lysopc 14:0	LipidsOthersPhospholipid	C04230	Common	kegg
MEDP338	Lysopc 16:0	LipidsOthersPhospholipid	C04230	Common	kegg
MEDP340	Lysopc 16:1	LipidsOthersPhospholipid	C04230	Common	kegg
MEDP342	Lysopc 18:0	LipidsOthersPhospholipid	C04230	Common	kegg
MEDP344	Lysopc 18:1	LipidsOthersPhospholipid	C04230	Common	kegg
MEDP346	Lysopc 18:2	LipidsOthersPhospholipid	C04230	Common	kegg
MEDP350	Lysopc 20:1	LipidsOthersPhospholipid	C04230	Common	kegg
MEDP352	Lysopc 20:2	LipidsOthersPhospholipid	C04230	Common	kegg
MEDP361	4-Hydroxybenzaldehyde	Benzene and substituted derivatives	C00633	Common	kegg
MEDP365	Cotinine N-Oxide	Benzene and substituted derivatives	-	-	-
MEDP368	Taurocholic Acid Sodium Salt Hydrate	Organic Acid And Its Derivatives	-	-	-
MEDP370	2-(Formylamino)Benzoic Acid	Benzene and substituted derivatives	C05653	Common	kegg
MEDP371	Acetaminophen Glucuronide	Carbohydrate metabolomics	-	human	vmh
MEDP372	Uridine 5-Monophosphate	Nucleotide metabolomics	C00105	Common	kegg
MEDP373	N-Acetylglycine	Amino Acid metabolomics	-	-	-
MEDP374	Cyclic Amp	Nucleotide metabolomics	C00575	Common	kegg
MEDP378	N6-Succinyl Adenosine	Nucleotide metabolomics	-	-	-
MEDP380	2-(Dimethylamino)Guanosine	Nucleotide metabolomics	-	-	-
MEDP381	7-Methylguanine	Nucleotide metabolomics	C02242	-	-
MEDP384	Isoxanthopterin	Pteridines and derivatives	C03975	-	-
MEDP386	N-Acetylthreonine	Amino Acid metabolomics	-	-	-
MEDP387	H-Homoarg-Oh	Amino Acid metabolomics	C01924	-	-
MEDP389	Pantetheine	CoOthersEnzyme Factor & vitamin	C00831	Common	kegg
MEDP391	Menaquinone	CoOthersEnzyme Factor & vitamin	-	-	-
MEDP394	4-Hydroxyretinoic Acid	CoOthersEnzyme Factor & vitamin	C16677	Common	kegg
MEDP395	L-Pipecolic Acid	Amino Acid metabolomics	C00408	Common	kegg
MEDP401	5'-Deoxy-5'-(Methylthio) Adenosine	Nucleotide metabolomics	C00170	Common	kegg
MEDP404	Sarcosine	Amino Acid metabolomics	C00213	Common	kegg
MEDP405	3-Aminoisobutanoic Acid	Amino Acid metabolomics	C05145	-	-
MEDP408	11-Cis-Retinol	CoOthersEnzyme Factor & vitamin	C00899	human	kegg
MEDP410	Trans-Citridic Acid	Organic Acid And Its Derivatives	C02341	Common	kegg
MEDP416	6-Phosphogluconic Acid Trisodium Salt	Carbohydrate metabolomics	-	-	-
MEDP428	Cholesterol	Lipids	C00187	Common	kegg
MEDP429	Punicic Acid	Lipids_Fatty Acids	C08364	-	-
MEDP430	2-Aminoadipic Acid	Organic Acid And Its Derivatives	C00956	Common	kegg
MEDP431	Hordenine	Benzene and substituted derivatives	C06199	Common	kegg
MEDP434	Lysopc 17:0	LipidsOthersPhospholipid	C04230	Common	kegg
MEDP435	6-Methylmercaptopurine	Nucleotide metabolomics	C16614	Common	kegg
MEDP437	Ergothioneine	Organic Acid And Its Derivatives	C05570	Common	kegg
MEDP440	Methoxyindoleacetic Acid	Indole And Its Derivatives	C05660	Common	kegg
MEDP442	Sn-Glycero-3-Phosphocholine	Cholines	C00670	Common	kegg
MEDP443	10-Formyl-Thf	Pteridines and derivatives	C00234	Common	kegg
MEDP450	P-Aminobenzoate	Benzene and substituted derivatives	C00568	Common	kegg
MEDP453	Indole	Indole And Its Derivatives	C00463	Common	kegg
MEDP454	Isoquinoline	Benzene and substituted derivatives	C06323	-	-
MEDP456	Piperidine	Benzene and substituted derivatives	C01746	human	kegg
MEDP457	5-Aminolevulinate	Organic Acid And Its Derivatives	C00430	Common	kegg
MEDP494	Lysopc 15:0	LipidsOthersPhospholipid	C04230	Common	kegg
MEDP498	Lysopc 18:3	LipidsOthersPhospholipid	-	-	-
MEDP507	2-Hydroxycinnamic acid	Benzene and substituted derivatives	C01772	Common	kegg
MEDP509	trans-3-Indoleacrylic acid	Organic Acid And Its Derivatives	-	-	-
MEDP510	Acetyl-L-carnitine	Camitine	C02571	human	kegg
MEDP513	Hexadecanamide	Lipids_Fatty Acids	-	-	-
MEDP514	Thiamine	CoOthersEnzyme Factor & vitamin	C00378	Common	kegg
MEDP517	Palmitoylcarnitine	Camitine	-	-	-
MEDP518	DL-Stachydrine	Organic Acid And Its Derivatives	-	-	-
MEDP519	L-Norleucine	Amino Acid metabolomics	C01933	-	-
MEDP523	DL-Carnitine	Camitine	-	-	-
MEDP525	N-Acetyl-L-alanine	Organic Acid And Its Derivatives	-	human	vmh
MEDP529	Indole-3-acetamide	Indole And Its Derivatives	C02693	Common	kegg
MEDP535	Triethyl phosphate	Organic Acid And Its Derivatives	-	-	-
MEDP537	PAF C-16	Lipids	-	-	-
MEDP540	7,8-dihydro-L-Biopterin	Pteridines and derivatives	C02953	Common	kegg
MEDP541	δ-Valerolactam	Pyridine And Pyridine Derivatives	-	-	-
MEDP545	2-Pyrrolidinone	Benzene and substituted derivatives	C11118	-	-
MEDP546	Oxindole	Indole And Its Derivatives	C12312	bacterium	kegg
MEDP561	Farnesene	Lipids_Fatty Acids	C09665	bacterium	kegg
MEDP574	Oleamide	Lipids_Fatty Acids	C19670	-	-
MEDP575	5-amino-1-[3,4-dihydroxy-5-(hydroxymethyl)oxolan-2-yl]imidazole-4-carboxamide	Nucleotide metabolomics	-	-	-
MEDP576	N1-Acetylspermine	Organic Acid And Its Derivatives	C02567	human	vmh
MEDP577	Isobutyryl carnitine	Camitine	-	-	-
MEDP578	alpha-Cadinene	Lipids_Fatty Acids	C16815	-	-
MEDP579	gamma-Muurolene	Lipids_Fatty Acids	-	-	-
MEDP581	10E,12Z-Octadecadienoic acid	Lipids_Fatty Acids	-	-	-
MEDP583	Asp-Phe methyl ester	Organic Acid And Its Derivatives	C11045	human	kegg
MEDP584	Pterine	Pteridines and derivatives	C00715	-	-
MEDP585	Stearidonic Acid	Lipids_Fatty Acids	C16300	Common	kegg
MEDP586	N-Acetylphenylalanine	Organic Acid And Its Derivatives	C03519	Common	kegg
MEDP587	N-Alpha-acetyllysine	Organic Acid And Its Derivatives	C12989	-	-
MEDP590	p-Mentha-1,3,8-triene	Lipids_Fatty Acids	-	-	-
MEDP594	Dihydroactinidiolide	Benzene and substituted derivatives	-	-	-
MEDP598	2'-Hydroxy-5'-methylacetophenone	Benzene and substituted derivatives	-	-	-
MEDP602	1-(4-Methoxyphenyl)-2-propanone	Benzene and substituted derivatives	-	-	-
MEDP603	Cuminaldehyde	Lipids_Fatty Acids	C06577	Common	kegg
MEDP606	2-(3,4-dimethoxyphenyl)ethanamine	Benzene and substituted derivatives	-	-	-
MEDP611	N-Acetyl-L-Histidine	Organic Acid And Its Derivatives	C02997	-	-
MEDP612	(S)-2,3-epoxysqualene	Terpenoid	C01054	Common	kegg
MEDP617	2-Furoylglycine	Amino Acid metabolomics	-	-	-
MEDP618	2-Methylbutyroylcarnitine	Lipids_Fatty Acids	-	-	-
MEDP627	Isonicotinic acid	Organic Acid And Its Derivatives	C07446	Common	kegg
MEDP631	Dimethyl fumarate	Lipids_Fatty Acids	-	-	-
MEDP632	beta-Cubebene	Lipids_Fatty Acids	C09648	-	-
MEDP634	cis-gondoic acid	Lipids_Fatty Acids	C16526	Common	kegg
MEDP636	Furfural	Organic Acid And Its Derivatives	C14279	Common	kegg
MEDP637	L-phenylalanyl-L-proline	Organic Acid And Its Derivatives	-	-	-
MEDP638	LysoPE(16:1(9Z)-0:0)	Lipids_Fatty Acids	-	-	-
MEDP642	3-Hydroxy-DL-kynurenine	Amino Acid metabolomics	C02794	Common	vmh
MEDP652	Methyl cinnamate	Benzene and substituted derivatives	C06358	-	-
MEDP653	Benzylcinnamate	Benzene and substituted derivatives	-	-	-
MEDP654	2-Phenylacetamide	Benzene and substituted derivatives	C02505	Common	kegg
MEDP656	Isoamyl butyrate	Fatty acyls	-	-	-
MEDP658	Ethyl dodecanoate	Fatty acyls	-	-	-
MEDP659	Propylpropionate	Fatty acyls	-	-	-
MEDP660	1,4-Xylene	Benzene and substituted derivatives	C06756	Common	kegg
MEDP668	m-Cresol	Phenols And Its Derivatives	C01467	bacterium	kegg
MEDP670	2,6-Dimethylpyridine	Pyridine And Pyridine Derivatives	-	-	-
MEDP672	Cyclohexylamine	Amines	C00571	bacterium	kegg
MEDP676	Butyl 3-methylbutanoate	Fatty acyls	-	-	-
MEDP677	Butylamine	Amines	-	-	-
MEDP681	2,2,2-Trichloroethanol	Alcohol	C07490	Common	kegg
MEDP682	Hydroxyacetone	Ketones	C05235	Common	kegg
MEDP685	Methylcysteine	Amino Acid metabolomics	-	-	-
MEDP686	2-Acetylfuran	Heterocyclic compound	-	-	-
MEDP688	Benzophenone	Benzene and substituted derivatives	C06354	-	-
MEDP689	TranexamicAcid	Organic Acid And Its Derivatives	-	-	-
MEDP695	Methyl tetradecanoate	Fatty acyls	-	-	-
MEDP697	2,6-Di-tert-butyl-4-methylphenol	Benzene and substituted derivatives	C14693	-	-
MEDP701	(E)-2-Octen-1-ol	Alcohol	-	-	-
MEDP707	2-Pentadecanone	Ketones	-	-	-
MEDP709	Methyl dihydrojasmonate	Organic Acid And Its Derivatives	-	-	-
MEDP710	Hexyl butyrate	Fatty acyls	-	-	-
MEDP716	cis-Citral	Aldehyde	C09847	bacterium	kegg
MEDP718	Methylisobutyrate	Organic Acid And Its Derivatives	-	-	-
MEDP719	N-Nitrosodiethylamine	Polyamine	C14422	-	-
MEDP724	3,5-Dinitrosalicylic acid	Organic Acid And Its Derivatives	C11319	-	-
MEDP729	Barbituric acid	Heterocyclic compound	C00813	Common	kegg
MEDP733	o-Xylene	Benzene and substituted derivatives	C07212	Common	kegg
MEDP736	1,3-diisopropylbenzene	Benzene and substituted derivatives	-	-	-
MEDP738	carene	Heterocyclic compound	-	-	-
MEDP739	Hexyl??Acetate	Fatty acyls	-	-	-
MEDP740	Farnesol	Alcohol	C01493	-	-
MEDP742	Terpinolene	Terpenoid	C06075	-	-
MEDP746	gamma-Terpinene	Terpenoid	C09900	-	-
MEDP747	alpha-Terpinene	Terpenoid	C09898	-	-
MEDP752	DL-Leucine	Amino Acid metabolomics	C00123	Common	kegg
MEDP759	Glycyrrhetinic acid	Terpenoid	C02283	-	-
MEDP760	9-Fluorenone	Ketones	C06712	Common	kegg
MEDP765	3-(Methylthio)-1-propanol	Alcohol	-	-	-
MEDP767	Aspirin	Organic Acid And Its Derivatives	C01405	human	kegg
MEDP778	Ethyl butyrate	Fatty acyls	-	-	-
MEDP781	2-Undecanone	Ketones	C01875	-	-
MEDP783	10-UNDECENOIC ACID	Fatty acyls	C13910	-	-
MEDP784	Undecanal	Aldehyde	-	-	-
MEDP789	2-Pentyl-3-phenyl-2-propenal	Aldehyde	C12288	-	-
MEDP791	4-aminophenol	Phenols And Its Derivatives	C02372	bacterium	kegg
MEDP792	PYRROLIDINE	Heterocyclic compound	-	-	-
MEDP794	Octanal	Aldehyde	C01545	-	-
MEDP796	Pyrene	Benzene and substituted derivatives	C14335	bacterium	kegg
MEDP799	(-)-Menthone	Ketones	C00843	bacterium	kegg
MEDP811	2-(Methylthio)benzothiazole	Benzene and substituted derivatives	C10910	-	-
MEDP812	5-METHYLFURFURAL	Aldehyde	C11115	-	-
MEDP814	METHYL VALERATE	Fatty acyls	-	-	-
MEDP815	N-ETHYLACETAMIDE	Amines	-	-	-
MEDP817	PROPYL HEXANOATE	Fatty acyls	-	-	-
MEDP818	1-PENTADECANOL	Alcohol	-	-	-
MEDP828	2-Methyl-1-propanol	Alcohol	C14710	-	-
MEDP831	1-Aminopropan-2-ol	Alcohol	C05771	bacterium	vmh
MEDP836	Dibutyl phthalate	Benzene and substituted derivatives	C14214	-	-
MEDP839	Pulegone	Ketones	C09893	bacterium	kegg
MEDP843	ETHYL ISOBUTYRATE	Fatty acyls	-	-	-
MEDP844	FURFURYL ALCOHOL	Alcohol	C20441	bacterium	kegg
MEDP845	1-Phenylethanol	Benzene and substituted derivatives	C07112	-	-
MEDP853	Choline chloride	Others	-	-	-
MEDP855	caprate (10:0)	Lipids	C02530	Common	kegg
MEDP856	Isobutyl decanoate	Fatty acyls	-	-	-
MEDP859	glycylphenylalanine	Amino Acid metabolomics	-	-	-
MEDP860	L-Glutamic acid	Amino Acid metabolomics	C00025	Common	kegg
MEDP863	proline betaine	Organic Acid And Its Derivatives	C00719	Common	kegg
MEDP865	Bisphenol propane	Benzene and substituted derivatives	C13624	Common	kegg
MEDP867	Vitamin E	CoOthersEnzyme Factor & vitamin	C02477	Common	kegg
MEDP868	N-methylalanine	Amino Acid metabolomics	-	-	-
MEDP871	sphinganine	Lipids	C00836	Common	kegg
MEDP872	Glycerophosphatidylcholine	Lipids	C00670	Common	kegg
MEDP873	3'-UMP	Nucleotide metabolomics	C01368	Common	kegg
MEDP874	tryptophan betaine	Organic Acid And Its Derivatives	C09213	-	-
MEDP876	O-Succinyl-L-Homoserine	Amino Acid metabolomics	C01118	Common	kegg
MEDP877	Cytidine 5'-Diphosphocholine	Nucleotide metabolomics	C00307	Common	kegg
MEDP878	N-Methyl-L-Glutamate	Amino Acid metabolomics	C01046	Common	kegg
MEDP879	N-Methyl-D-Aspartic Acid	Amino Acid metabolomics	C12269	-	-
MEDP881	Phosphocholine	Nucleotide metabolomics	C00588	Common	kegg
MEDP883	2,4-Dihydroxypteridine	Pteridines and derivatives	C03212	-	-
MEDP884	L-Methionine Sulfoximine	Organic Acid And Its Derivatives	C03510	-	-
MEDP888	2'-Deoxycytidine 5'-Diphosphate	Nucleotide metabolomics	C00705	Common	kegg
MEDP889	Cortisol	Lipids	C00735	Common	kegg
MEDP891	L-Tryptophanamide	Amino Acid metabolomics	C00977	-	-
MEDP904	Oleate	Lipids	C00712	Common	kegg
