# Supplementary material for: Untargeted metabolomics for uncovering plasma biological markers of wet age-related macular degeneration
Source: Aging (Albany NY). 2021 May 4;13(10):13968–4000. doi: 10.18632/aging.203006 (PMC8202859; doi:10.18632/aging.203006)
Supplement: Supplementary File 6 [file aging-13-203006-s006.docx]

**Supplementary File 6. The effects of sodium cyclamate on the activity and cytotoxicity of HRPECs.**

|  | **Group** | **Mean±SEM (%)** | **Comparing group  *P* value** | |
| --- | --- | --- | --- | --- |
| Cell activity (24h) | | Con | | --- | | DMSO | | Cur | | S-50 | | S-100 | | S-150 | | S-200 | | | 1.107 ± 0.016 | | --- | | 1.040 ± 0.027 | | 0.787 ± 0.026 | | 0.702 ± 0.027 | | 0.379 ± 0.003 | | 0.228 ± 0.007 | | 0.196 ± 0.003 | | | Con vs DMSO | | --- | | DMSO vs Cur | | S-50 vs Con | | S-100 vs Con | | S-150 vs Con | | S-200 vs Con | | S-50 vs Cur | | S-100 vs Cur | | S-150 vs Cur | | S-200 vs Cur | | | 0.077 | | --- | | 0.006 | | 0.000 | | 0.000 | | 0.000 | | 0.000 | | 0.065 | | 0.000 | | 0.000 | | 0.000 | |
| Cell activity (48h) | | Con | | --- | | DMSO | | Cur | | S-50 | | S-100 | | S-150 | | S-200 | | | 1.669 ± 0.061 | | --- | | 1.680 ± 0.026 | | 1.563 ± 0.009 | | 0.969 ± 0.077 | | 0.404 ± 0.011 | | 0.190 ± 0.002 | | 0.178 ± 0.002 | | | Con vs DMSO | | --- | | DMSO vs Cur | | S-50 vs Con | | S-100 vs Con | | S-150 vs Con | | S-200 vs Con | | S-50 vs Cur | | S-100 vs Cur | | S-150 vs Cur | | S-200 vs Cur | | | 0.876 | | --- | | 0.006 | | 0.000 | | 0.000 | | 0.000 | | 0.000 | | 0.000 | | 0.000 | | 0.000 | | 0.000 | |
| Inhibition rate (24h) | | Cur | | --- | | S-50 | | S-100 | | S-150 | | S-200 | | | 13.229 ± 0.829 | | --- | | 27.172 ± 0.780 | | 28.919 ± 0.540 | | 30.581 ± 0.910 | | 36.554 ± 0.419 | | | S-50 vs Cur | | --- | | S-100 vs Cur | | S-150 vs Cur | | S-200 vs Cur | | | 0.000 | | --- | | 0.000 | | 0.000 | | 0.000 | |
| Inhibition rate (48h) | | Cur | | --- | | S-50 | | S-100 | | S-150 | | S-200 | | | 16.174 ± 0.310 | | --- | | 28.413 ± 0.975 | | 28.934 ± 0.764 | | 32.410 ± 0.153 | | 37.059 ± 0.216 | | | S-50 vs Cur | | --- | | S-100 vs Cur | | S-150 vs Cur | | S-200 vs Cur | | | 0.000 | | --- | | 0.000 | | 0.000 | | 0.000 | |

The effects of sodium cyclamate on apoptosis and necrosis of HRPECs

|  | **Group** | **Mean±SEM (%)** | **Comparing group  *P* value** | |
| --- | --- | --- | --- | --- |
| Apoptosis rate (24h) | | Con | | --- | | DMSO | | Cur | | S-50 | | S-100 | | S-150 | | S-200 | | | 3.863 ± 0.669 | | --- | | 4.414 ± 0.400 | | 11.720 ± 0.165 | | 4.271 ± 0.296 | | 9.725 ± 0.580 | | 29.950 ± 0.968 | | 32.840 ± 6.615 | | | Con vs DMSO | | --- | | DMSO vs Cur | | S-50 vs Con | | S-100 vs Con | | S-150 vs Con | | S-200 vs Con | | S-50 vs Cur | | S-100 vs Cur | | S-150 vs Cur | | S-200 vs Cur | | | 0.518 | | --- | | 0.000 | | 0.607 | | 0.003 | | 0.000 | | 0.012 | | 0.000 | | 0.030 | | 0.000 | | 0.013 | |
| Apoptosis rate (48h) | | Con | | --- | | DMSO | | Cur | | S-50 | | S-100 | | S-150 | | S-200 | | | 6.449 ± 0.370 | | --- | | 7.611 ± 0.315 | | 13.22 ± 0.763 | | 5.187 ± 0.552 | | 12.180 ± 1.173 | | 31.550 ± 4.388 | | 35.850 ± 0.263 | | | Con vs DMSO | | --- | | DMSO vs Cur | | S-50 vs Con | | S-100 vs Con | | S-150 vs Con | | S-200 vs Con | | S-50 vs Cur | | S-100 vs Cur | | S-150 vs Cur | | S-200 vs Cur | | | 0.227 | | --- | | 0.009 | | 0.015 | | 0.000 | | 0.002 | | 0.008 | | 0.001 | | 0.008 | | 0.009 | | 0.003 | |
| Necrosis rate (24h) | | Con | | --- | | DMSO | | Cur | | S-50 | | S-100 | | S-150 | | S-200 | | | 0.127 ± 0.001 | | --- | | 0.127 ± 0.001 | | 1.411 ± 0.243 | | 1.413 ± 0.311 | | 2.962 ± 0.201 | | 24.850 ± 3.528 | | 25.310 ± 5.083 | | | Con vs DMSO | | --- | | DMSO vs Cur | | S-50 vs Con | | S-100 vs Con | | S-150 vs Con | | S-200 vs Con | | S-50 vs Cur | | S-100 vs Cur | | S-150 vs Cur | | S-200 vs Cur | | | 0.075 | | --- | | 0.003 | | 0.130 | | 0.010 | | 0.005 | | 0.000 | | 0.001 | | 0.497 | | 0.015 | | 0.000 | |
| Necrosis rate (48h) | | Con | | --- | | DMSO | | Cur | | S-50 | | S-100 | | S-150 | | S-200 | | | 0.133 ± 0.025 | | --- | | 0.133 ± 0.025 | | 4.167 ± 1.381 | | 1.675 ± 0.159 | | 3.485 ± 1.101 | | 26.510 ± 4.733 | | 27.010 ± 4.354 | | | Con vs DMSO | | --- | | DMSO vs Cur | | S-50 vs Con | | S-100 vs Con | | S-150 vs Con | | S-200 vs Con | | S-50 vs Cur | | S-100 vs Cur | | S-150 vs Cur | | S-200 vs Cur | | | 0.154 | | --- | | 0.043 | | 0.001 | | 0.039 | | 0.005 | | 0.004 | | 0.148 | | 0.719 | | 0.011 | | 0.008 | |

| **Group** | **Mean±SEM** | **Comparing group  *P* value** | |
| --- | --- | --- | --- |
| | Con | | --- | | DMSO | | Bev | | S-50 | | S-100 | | S-150 | | S-200 | | | 59.161 ± 2.126 | | --- | | 60.348 ± 0.180 | | 48.624 ± 0.637 | | 33.697 ± 0.564 | | 23.102 ± 0.361 | | 0.000 ± 0.000 | | 0.000 ± 0.000 | | | Con vs DMSO | | --- | | Con vs Bev | | S-50 vs Con | | S-100 vs Con | | S-150 vs Con | | S-200 vs Con | | S-50 vs Bev | | S-100 vs Bev | | S-150 vs Bev | | S-200 vs Bev | | | 0.608 | | --- | | 0.009 | | 0.000 | | 0.000 | | 0.000 | | 0.000 | | 0.000 | | 0.000 | | 0.000 | | 0.000 | |

The effects of sodium cyclamate on migration rate of HRECs
